# Supplementary material for: Design-rules for stapled peptides with in vivo activity and their application to Mdm2/X antagonists
Source: PubMed Central journal article supplement (PMC10786919; doi:10.1038/s41467-023-43346-4), 2024-01-12
Supplement: 41467_2023_43346_MOESM1_ESM.pdf [file 41467_2023_43346_MOESM1_ESM.pdf]

**Supplementary Information for:**

**Design-Rules for Stapled Peptides with in vivo Activity and their Application to Mdm2/X antagonists**

Arun Chandramohan<sup>1</sup>, Hubert Josien<sup>2</sup>, Tsz Ying Yuen<sup>3</sup>, Ruchia Duggal<sup>4</sup>, Diana Spiegelberg<sup>5</sup>, Lin Yan<sup>2</sup>, Yu-Chi Angela Juang<sup>1</sup>, Lan Ge<sup>2</sup>, Pietro G. Aronica<sup>6</sup>, Hung Yi Kristal Kaan<sup>1</sup>, Yee Hwee Lim<sup>3</sup>, Andrea Peier<sup>2</sup>, Brad Sherborne<sup>2</sup>, Jerome Hochman<sup>7</sup>, Songnian Lin<sup>2</sup>, Kaustav Biswas<sup>4</sup>, Marika Nestor<sup>8</sup>, Chandra S Verma<sup>6</sup>, David P. Lane<sup>9</sup>, Tomi K. Sawyer<sup>4</sup>, Robert Garbaccio<sup>2</sup>, Brian Henry<sup>1,\*</sup>, Srinivasaraghavan Kannan<sup>6,\*</sup>, Christopher J. Brown<sup>9,\*</sup>, Charles W. Johannes<sup>3,\*</sup>, Anthony William Partridge<sup>1,ψ,\*</sup>

<sup>1</sup> MSD International, Singapore 138665, Singapore.

<sup>2</sup> Merck & Co., Inc., Kenilworth, New Jersey 07033, United States.

<sup>3</sup> Institute of Sustainability for Chemicals, Energy and Environment, Agency for Science, Technology and Research (ASTAR), 8 Biomedical Grove, #07, Neuros Building, Singapore 138665

<sup>4</sup> Merck & Co., Inc., Boston, Massachusetts 02115, United States.

<sup>5</sup> Department of Surgical Sciences, Uppsala University, Sweden

<sup>6</sup> Bioinformatics Institute, Agency for Science, Technology and Research (ASTAR), 30 Biopolis Street, #07-01 Matrix, Singapore 138671, Singapore

<sup>7</sup> Merck & Co., Inc., West Point, Pennsylvania, 19486, United States

<sup>8</sup> Department of Immunology, Genetics and Pathology, Uppsala University, Uppsala, Sweden.

<sup>9</sup> Institute of Molecular and Cell Biology, Singapore, 138673, Singapore.

ψ Current Address: Genentech, South San Francisco, CA

\* To whom correspondence should be addressed: [brian.henry3@msd.com](mailto:brian.henry3@msd.com), [raghvk@bii.a-star.edu.sg](mailto:raghvk@bii.a-star.edu.sg), [CJBrown@imcb.a-star.edu.sg](mailto:CJBrown@imcb.a-star.edu.sg), [cwjohannes@gmail.com](mailto:cwjohannes@gmail.com), [partridge.anthony@gene.com](mailto:partridge.anthony@gene.com)

### AlogP98 distribution

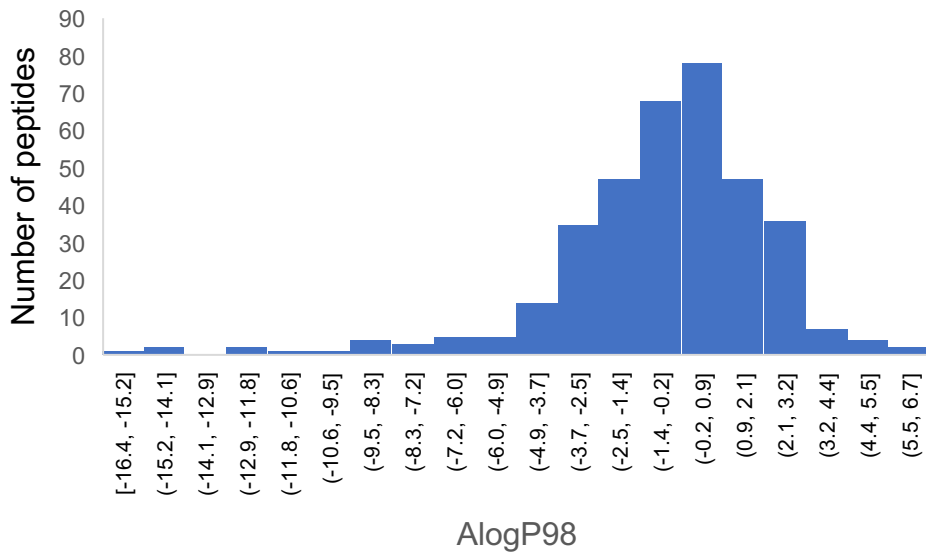

### LogD distribution

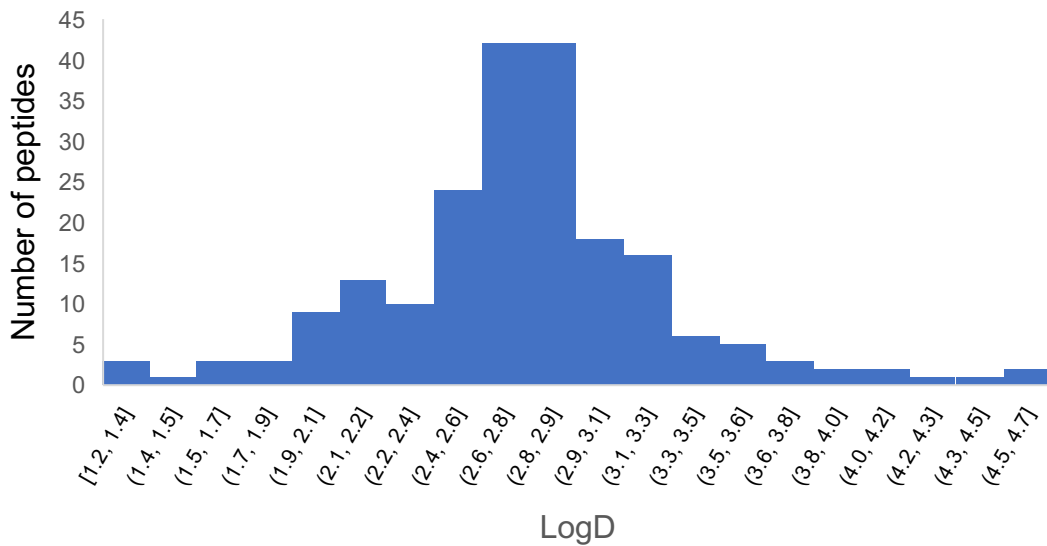

### Counterscreen EC50 distribution

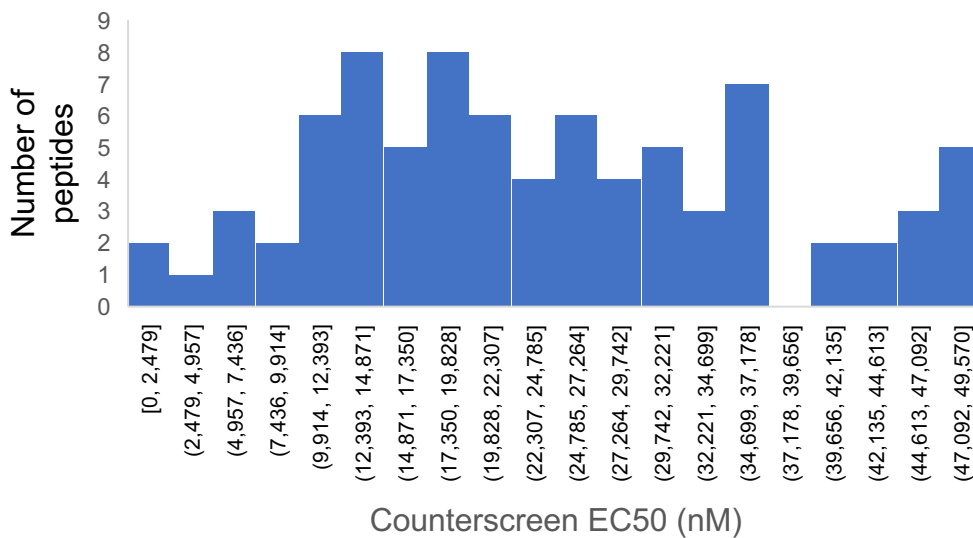

Supplementary Figure 1: Library of ATSP-7041 analogs have diverse values for polarity(AlogP98 and LogD), Counterscreen potency, LDH release activity, p53 activation, and biochemical binding

### LDH EC50 distribution

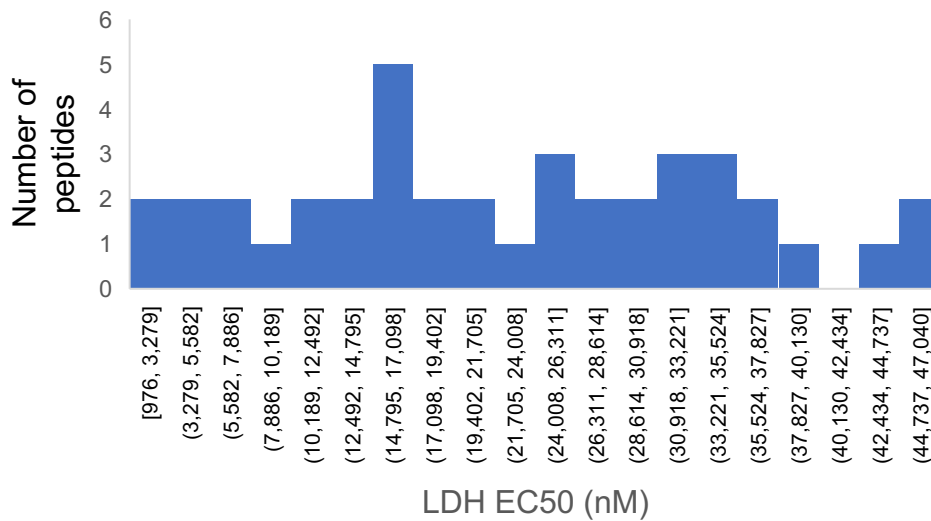

### p53 activation EC50 distribution

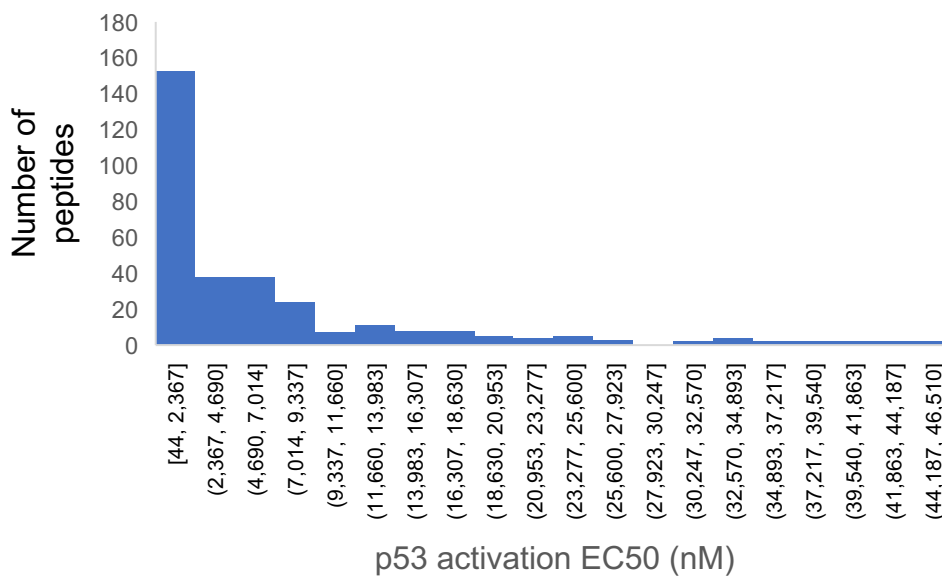

### Biochemical p53 binding KD distribution

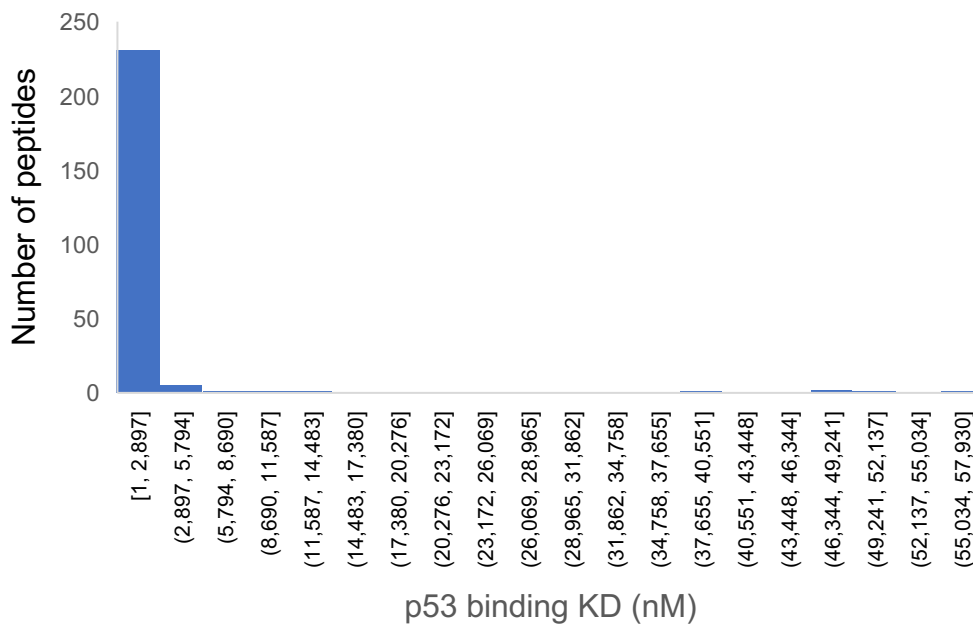

A)

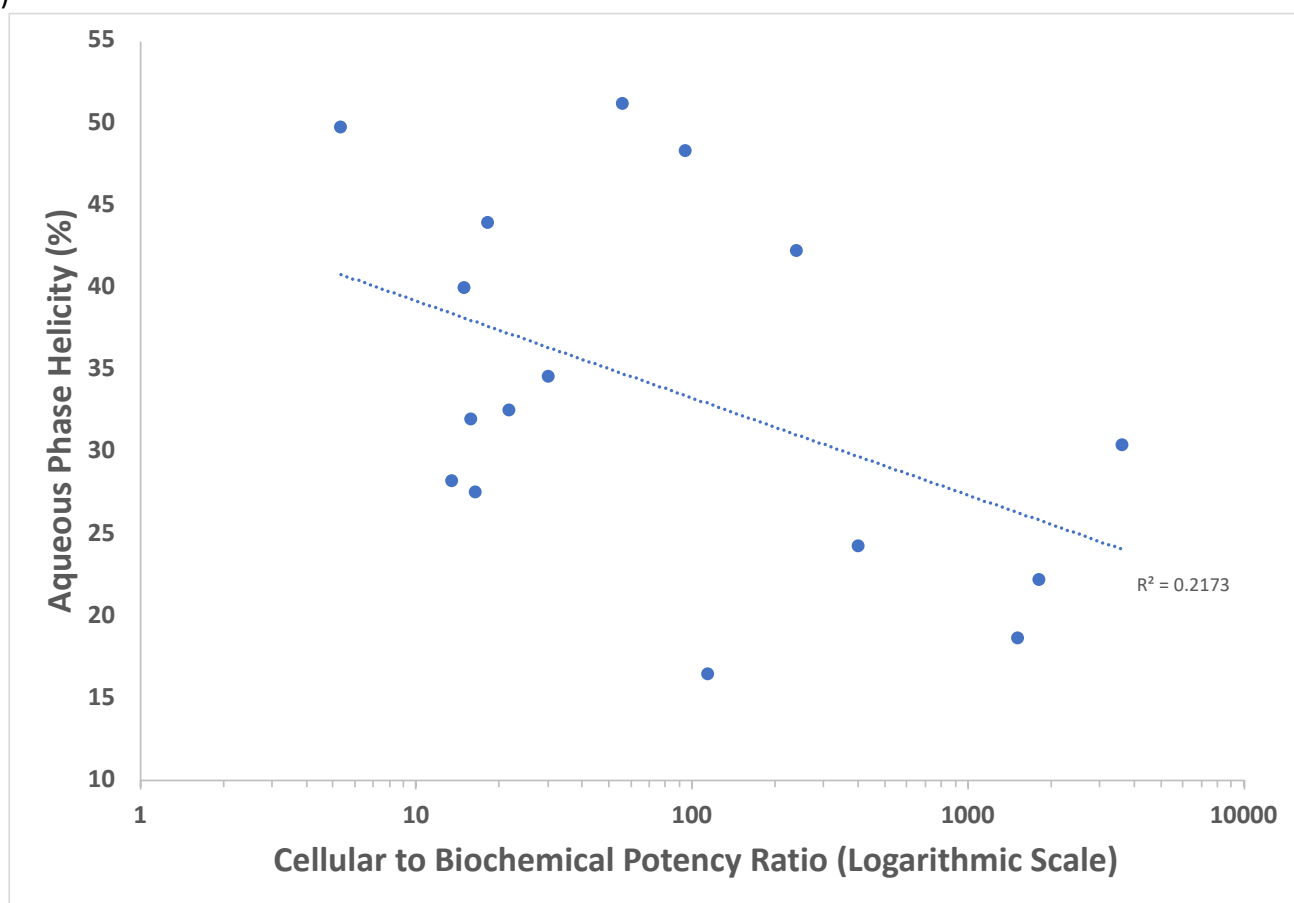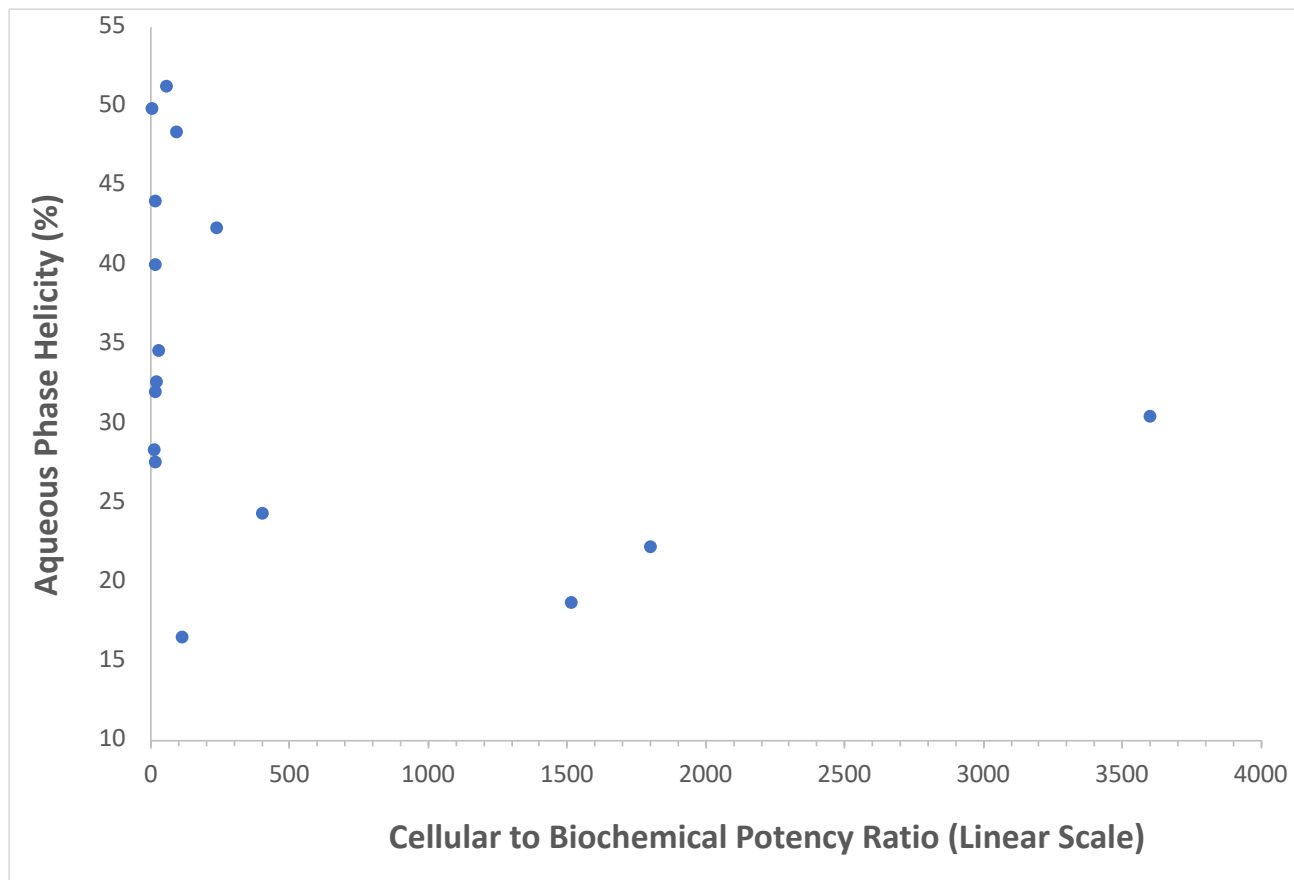

Supplementary Figure 2: Azide-ATSP-7041 analogs demonstrated weak correlations for between their aqueous phase helicity and cellular to biochemical ratios (A) Nanoclick activities and logD values (B) and a moderate correlation between logD values and cellular activities (C)

B

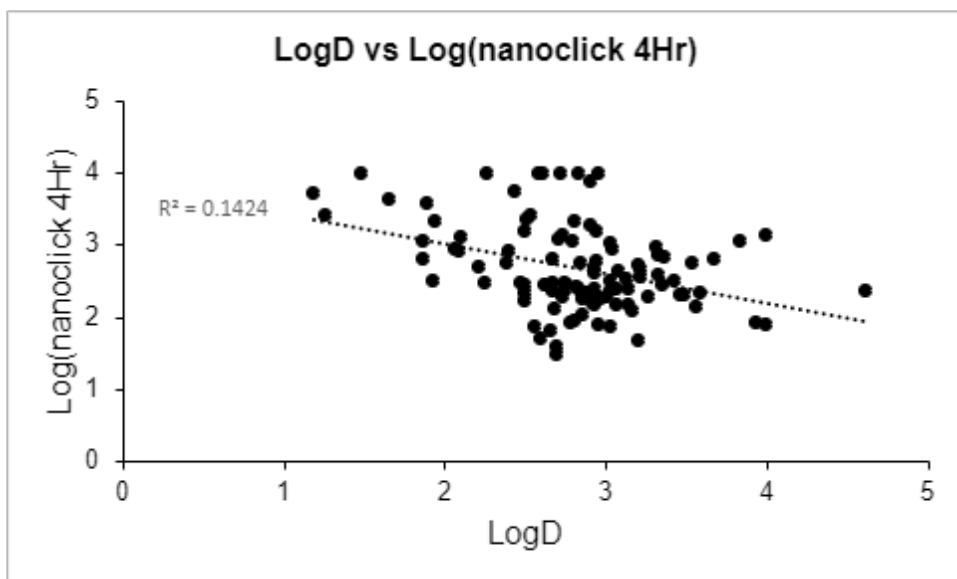

C

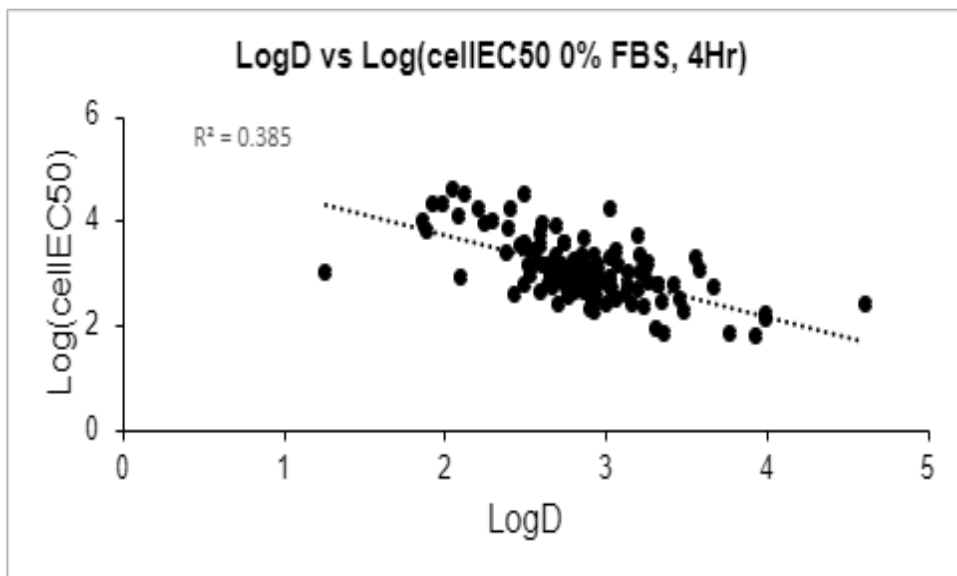

Supplementary Figure 2 cont: Azide-ATSP-7041 analogs demonstrated weak correlations for between their aqueous phase helicity and cellular to biochemical ratios (A) Nanoclick activities and logD values (B) and a moderate correlation between logD values and cellular activities (C)

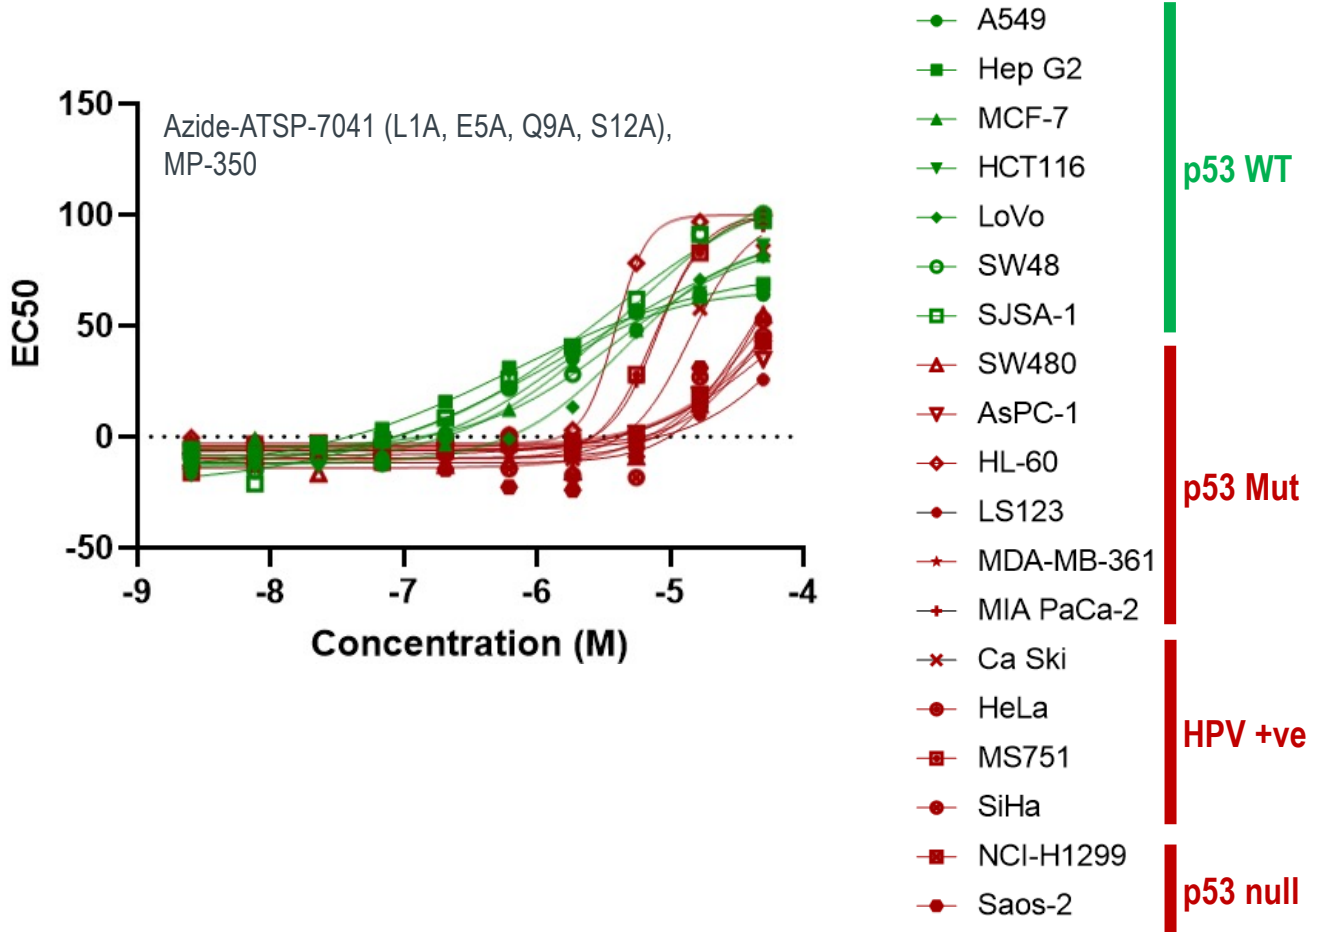

Supplementary Figure 3: A highly apolar azide-ATSP-7041 analog with alanine substitutions at positions L1, E5, Q9, and S12 (MP-350) shows cellular proliferation activities in p53 deficient cell lines (i.e., p53 null, mutant, or p53-depleted through HPV infection, red) that overlap with those in cell lines that are p53 wild-type (green), indicating significant off-target toxicity

Stability of MP-464 in Rat Plasma

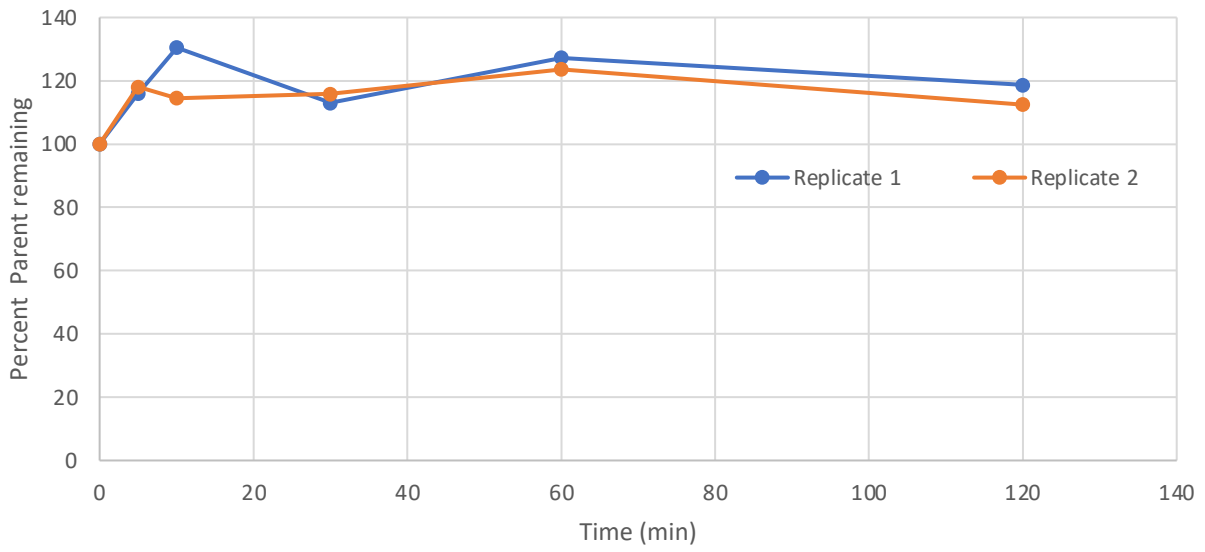

Supplementary Figure 4: Stability of MP-464 in Rat Plasma

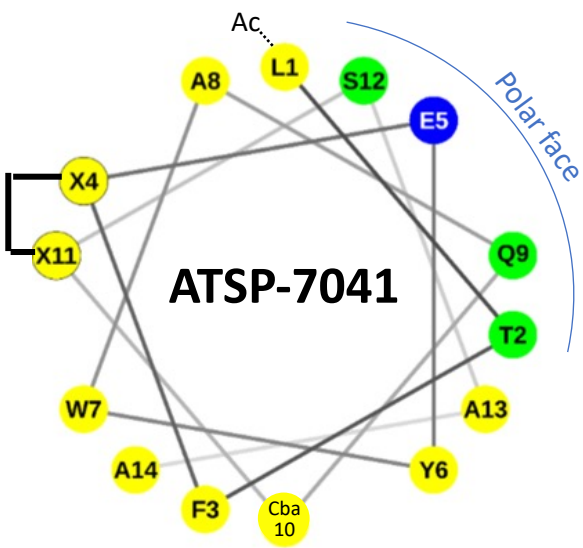

VS

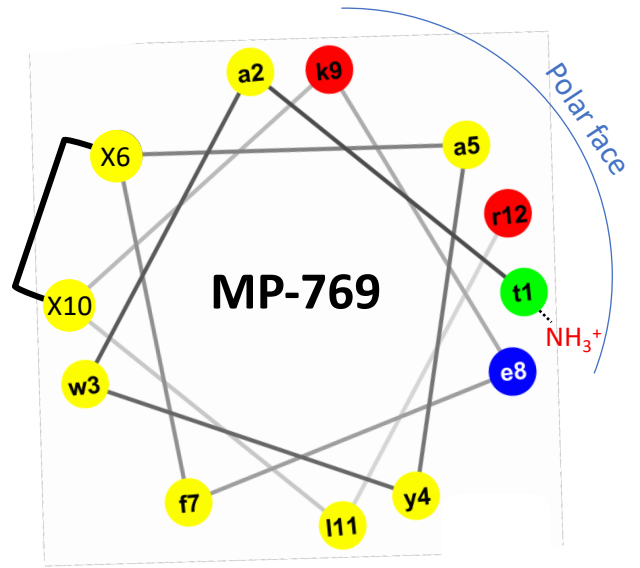

Supplementary Figure 5: Comparison of amphipathicity of all-L (ATSP-7041) and all-D (MP-769) stapled peptides. Residue in yellow are apolar, residues in green are polar uncharged, residues in blue are anionic, and residues in red are cationic



Supplementary Table 1: Summary of activities for azide-ATSP-7041 variant peptides (see Supplementary Data 1 for peptide sequences). Cellular assays (TETCHO, LDH, p53 reporter) were done with 0% serum and measured at the 4-hour time point. P.B. = poorly behaved in solubility assay conditions, result inconclusive. N.D. = No data available.

| Peptide ID | Trivial Name                 | Net Charge | Solubility ( $\mu\text{M}$ ) | TETCHO: Counter-screen EC50 ( $\mu\text{M}$ ) | LDH: Cytotoxicity assay EC50 ( $\mu\text{M}$ ) | p53 reporter assay: EC50 ( $\mu\text{M}$ ) | FP binding $K_D$ (nM) |
|------------|------------------------------|------------|------------------------------|-----------------------------------------------|------------------------------------------------|--------------------------------------------|-----------------------|
| MP-081     | AZIDE-ATSP-7041              | -1         | 105                          | >50                                           | >50                                            | 0.49                                       | 5.0                   |
| MP-952     | AZIDE-ATSP-7041 (L1A)        | -1         | 109                          | >50                                           | >50                                            | 0.78                                       | 10.7                  |
| MP-953     | AZIDE-ATSP-7041 (T2A)        | -1         | 186                          | >50                                           | >50                                            | 1.0                                        | 80.5                  |
| MP-892     | AZIDE-ATSP-7041 (F3A)        | -1         | 101                          | >50                                           | >50                                            | >50                                        | 13240                 |
| MP-954     | AZIDE-ATSP-7041 (E5A)        | 0          | P.B.                         | >50                                           | >50                                            | 0.28                                       | 47.7                  |
| MP-893     | AZIDE-ATSP-7041(W7A)         | -1         | 51                           | 18.4                                          | 15.0                                           | 20.7                                       | 4595                  |
| MP-955     | AZIDE-ATSP-7041 (Q9A)        | -1         | 86.5                         | >50                                           | >50                                            | 0.36                                       | 54.3                  |
| MP-894     | AZIDE-ATSP-7041 (CBA10 TO A) | -1         | 93                           | 7.7                                           | >50                                            | 14.4                                       | 114.7                 |
| MP-8956    | AZIDE-ATSP-7041 (S12A)       | -1         | 108                          | >50                                           | >50                                            | 0.34                                       | 36.2                  |
| MP-546     | AZIDE-ATSP-7041 (L1K)        | 0          | 2                            | >50                                           | >50                                            | 1.6                                        | 3.8                   |
| MP-547     | AZIDE-ATSP-7041 (T2K)        | 0          | 3                            | >50                                           | >50                                            | 2.1                                        | 5.4                   |
| MP-548     | AZIDE-ATSP-7041 (E5K)        | 0          | 5                            | 24.0                                          | 12.2                                           | 2.7                                        | 115.1                 |
| MP-549     | AZIDE-ATSP-7041 (A8K)        | 0          | 4.5                          | >50                                           | >50                                            | 3.6                                        | 11.1                  |
| MP-550     | AZIDE-ATSP-7041 (Q9K)        | 0          | 4                            | >50                                           | >50                                            | 1.4                                        | 8.2                   |
| MP-551     | AZIDE-ATSP-7041 (S12K)       | 0          | 2                            | 34.5                                          | >50                                            | 1.8                                        | 39.7                  |

|        |                                 |    |      |      |      |      |       |
|--------|---------------------------------|----|------|------|------|------|-------|
| MP-552 | AZIDE-ATSP-7041<br>(L1R)        | 0  | 2    | >50  | >50  | 1.8  | 62.9  |
| MP-553 | AZIDE-ATSP-7041<br>(T2R)        | 0  | P.B. | 27.1 | >50  | 2.1  | 30.6  |
| MP-554 | AZIDE-ATSP-7041<br>(E5R)        | +1 | P.B. | 16.7 | 30.4 | 2.3  | 33.0  |
| MP-555 | AZIDE-ATSP-7041<br>(A8R)        | 0  | 2    | >50  | >50  | 2.3  | 69.4  |
| MP-556 | AZIDE-ATSP-7041<br>(Q9R)        | 0  | 1    | 14.3 | >50  | 1.0  | 45.9  |
| MP-557 | AZIDE-ATSP-7041<br>(S12R)       | 0  | P.B. | >50  | >50  | 1.3  | 78.7  |
| MP-896 | AZIDE-ATSP-7041<br>(L1hR)       | 0  | 2.5  | >50  | >50  | 0.88 | 8.6   |
| MP-897 | AZIDE-ATSP-7041<br>(T2hR)       | 0  | 9    | >50  | >50  | 0.78 | 2.8   |
| MP-898 | AZIDE-ATSP-7041<br>(E5hR)       | +1 | 2    | >50  | 12.4 | 1.9  | 35.5  |
| MP-899 | AZIDE-ATSP-7041<br>(A8hR)       | 0  | 2    | >50  | >50  | 1.6  | N.D.  |
| MP-900 | AZIDE-ATSP-7041<br>(Q9hR)       | 0  | 10   | >50  | >50  | 0.81 | 28.5  |
| MP-901 | AZIDE-ATSP-7041<br>(S12hR)      | 0  | P.B. | >50  | >50  | 1.1  | 5.0   |
| MP-881 | AZIDE-ATSP-7041<br>(A13hR)      | 0  | 2    | >50  | >50  | 0.89 | 42.5  |
| MP-902 | AZIDE-ATSP-7041<br>(A14hR)      | 0  | 6    | >50  | >50  | 0.90 | 8.6   |
| MP-168 | AZIDE-ATSP-7041<br>(L1 TO AIB)  | -1 | 79.5 | >50  | >50  | 0.49 | 16.1  |
| MP-169 | AZIDE-ATSP-7041<br>(T2 TO AIB)  | -1 | 61.5 | >50  | >50  | 2.9  | 231.4 |
| MP-170 | AZIDE-ATSP-7041<br>(A8 TO AIB)  | -1 | 92.5 | >50  | >50  | 1.5  | 47.6  |
| MP-171 | AZIDE-ATSP-7041<br>(Q9 TO AIB)  | -1 | 34   | >50  | >50  | 0.25 | 36.6  |
| MP-172 | AZIDE-ATSP-7041<br>(S12 TO AIB) | -1 | 140  | >50  | 13.4 | 0.25 | 22.7  |

|        |                                 |      |       |      |     |      |         |
|--------|---------------------------------|------|-------|------|-----|------|---------|
| MP-257 | AZIDE-ATSP-7041<br>(A13 TO AIB) | -1   | 25    | >50  | 4.5 | 0.49 | 15.2    |
| MP-173 | AZIDE-ATSP-7041<br>(L1H)        | -0.5 | 5     | 21.7 | >50 | 4.2  | 0.7     |
| MP-174 | AZIDE-ATSP-7041<br>(T2H)        | -0.5 | 1     | 5.9  | >50 | 8.1  | 64.2    |
| MP-175 | AZIDE-ATSP-7041<br>(E5H)        | +0.5 | 2     | 10.6 | >50 | 0.62 | 21.1    |
| MP-496 | AZIDE-ATSP-7041<br>(A8H)        | -0.5 | 20    | 2.8  | >50 | 1.6  | 22.7    |
| MP-176 | AZIDE-ATSP-7041<br>(Q9H)        | -0.5 | 2     | 24.4 | >50 | 9.3  | 9.6     |
| MP-177 | AZIDE-ATSP-7041<br>(S12H)       | -0.5 | 6.5   | 12.0 | >50 | 4.3  | 4.5     |
| MP-178 | AZIDE-ATSP-7041<br>(L1E)        | -2   | 169   | >50  | >50 | 3.3  | 1.9     |
| MP-179 | AZIDE-ATSP-7041<br>(T2E)        | -2   | 102.5 | >50  | >50 | 33.2 | 42.4    |
| MP-843 | AZIDE-ATSP-7041<br>(F3E)        | -2   | 151   | >50  | >50 | >50  | 11220   |
| MP-842 | AZIDE-ATSP-7041<br>(Y6E)        | -2   | 157   | >50  | >50 | >50  | 5.1     |
| MP-956 | AZIDE-ATSP-7041<br>(W7E)        | -2   | 175   | >50  | >50 | >50  | >101000 |
| MP-180 | AZIDE-ATSP-7041<br>(A8E)        | -2   | 93    | >50  | >50 | 0.37 | 3.2     |
| MP-181 | AZIDE-ATSP-7041<br>(Q9E)        | -2   | 179   | >50  | >50 | 3.7  | 34.6    |
| MP-841 | AZIDE-ATSP-7041<br>(CBA10E)     | -2   | 162   | >50  | >50 | >50  | 311.6   |
| MP-182 | AZIDE-ATSP-7041<br>(S12E)       | -2   | 163   | >50  | >50 | 0.58 | 0.73    |
| MP-898 | AZIDE-ATSP-7041(A13E)           | -2   | 145   | >50  | >50 | 7.0  | 14.2    |
| MP-524 | AZIDE-ATSP-7041<br>(A14E)       | -2   | 148   | >50  | >50 | 0.86 | 0.7     |
| MP-183 | AZIDE-ATSP-7041<br>(L1W)        | -1   | 19    | >50  | >50 | 0.54 | 16.5    |

|         |                                  |    |      |      |     |      |         |
|---------|----------------------------------|----|------|------|-----|------|---------|
| MP-1184 | AZIDE-ATSP-7041<br>(T2W)         | -1 | 28.5 | >50  | >50 | 2.13 | 204     |
| MP-185  | AZIDE-ATSP-7041<br>(E5W)         | -1 | 2    | >50  | >50 | 0.14 | 98.5    |
| MP-186  | AZIDE-ATSP-7041<br>(A8W)         | -1 | 1    | >50  | >50 | 0.69 | 8.5     |
| MP-187  | AZIDE-ATSP-7041<br>(Q9W)         | -1 | 3.5  | >50  | >50 | 0.52 | 86.0    |
| MP-188  | AZIDE-ATSP-7041<br>(S12W)        | -1 | 50   | >50  | >50 | 0.62 | 48.0    |
| MP-258  | AZIDE-ATSP-7041<br>(T2V)         | -1 | 79   | 30.0 | >50 | 0.65 | 71.5    |
| MP-259  | AZIDE-ATSP-7041<br>(L1P)         | -1 | 90.5 | >50  | >50 | 0.71 | 22.6    |
| MP-8834 | AZIDE-ATSP-7041<br>(E5P)         | 0  | 1    | >50  | >50 | 16.4 | 7837    |
| MP-260  | AZIDE-ATSP-7041<br>(Q9P)         | -1 | P.B. | >50  | >50 | 3.2  | 45.8    |
| MP-184  | AZIDE-ATSP-7041<br>(S12P)        | -1 | P.B. | >50  | >50 | 3.2  | 50.1    |
| MP-261  | AZIDE-ATSP-7041<br>(L1G)         | -1 | 89   | >50  | >50 | 1.36 | 9.5     |
| MP-210  | AZIDE-ATSP-7041<br>(E5G)         | 0  | 2    | >50  | >50 | 0.28 | 68.2    |
| MP-262  | AZIDE-ATSP-7041<br>(Q9G)         | -1 | 87   | 30.5 | >50 | 0.78 | 19.1    |
| MP-798  | AZIDE-ATSP-7041<br>(S12G)        | -1 | 80   | >50  | >50 | 0.63 | 12.4    |
| MP-028  | AZIDE-ATSP-7041<br>(Y6F)         | -1 | 6    | 13.0 | 8.4 | 0.50 | 3.3     |
| MP-202  | AZIDE-ATSP7041 (F3<br>to D-PHE)  | -1 | 143  | 40.8 | >50 | 33.4 | >101000 |
| MP-7470 | AZIDE-ATSP-7041<br>(L1 TO D-ALA) | -1 | 90   | >50  | >50 | 0.73 | 8.0     |
| MP-7471 | AZIDE-ATSP-7041<br>(T2 TO D-ALA) | -1 | 93.5 | >50  | >50 | 1.44 | 70.5    |
| MP-473  | AZIDE-ATSP-7041<br>(E5 TO D-ALA) | 0  | P.B. | >50  | >50 | 0.18 | 11.5    |

|        |                                                              |    |       |      |      |      |       |
|--------|--------------------------------------------------------------|----|-------|------|------|------|-------|
| MP-511 | AZIDE-ATSP-7041<br>(A8 TO D-ALA)                             | -1 | N.D.  | >50  | >50  | 0.92 | 65.4  |
| MP-474 | AZIDE-ATSP-7041<br>(Q9 TO D-ALA)                             | -1 | 156   | >50  | >50  | 0.32 | 18.5  |
| MP-475 | AZIDE-ATSP-7041<br>(S12 TO D-ALA)                            | -1 | 17    | >50  | >50  | 0.46 | 4.8   |
| MP-030 | AZIDE-ATSP-7041<br>(W7 TO<br>TRIFLUOROMETHYL-<br>PHE)        | -1 | P.B.  | >50  | >50  | 0.26 | 1.0   |
| MP-765 | AZIDE-ATSP-7041<br>(W7 TO 3,4-<br>DICHLORO-PHE)              | -1 | P.B.  | 11.8 | >50  | 0.90 | 5.3   |
| MP-004 | AZIDE-ATSP-7041<br>(W7 TO 6-FLURO-1-<br>TRP)                 | -1 | 110   | >50  | 23.9 | 0.20 | 1.0   |
| MP-495 | AZIDE-ATSP-7041<br>(L1D, E5D, A8D)                           | -3 | 78.67 | >50  | >50  | 21.3 | 5.2   |
| MP-359 | AZIDE-ATSP-7041<br>(L1N, E5N, A8N,<br>S12N, A13N, A14N)      | -1 | 53.67 | >50  | >50  | 32.3 | 15.0  |
| MP-537 | AZIDE-ATSP-7041<br>(L1R, Q9R, S12K)                          | +2 | 140   | 18.7 | 7.3  | 3.9  | 64.6  |
| MP-538 | AZIDE-ATSP-7041<br>(L1R, Y6F, L9R)                           | +1 | 5     | >50  | 6.8  | 4.92 | 116.8 |
| MP-539 | AZIDE-ATSP-7041<br>(L1R, A8R, A13R)                          | +2 | 97.5  | 50.0 | 13.4 | 7.12 | 9.1   |
| MP-878 | NH2-GRSRRRAA-<br>AZIDE-ATSP-<br>7041(L1A, E5A,<br>Q9A, S12A) | +5 | P.B.  | 6.7  | 32.9 | 0.65 | 49.1  |
| MP-879 | NH2-PAAKRVKLDG-<br>AZIDE-ATSP-7041                           | +3 | 162   | 35.8 | >50  | 2.4  | 38.7  |
| MP-950 | NH2-EEE-AZIDE-<br>SGS-PM2-EEE                                | -6 | 118   | >50  | >50  | >50  | 2.4   |

Supplementary Table 2 (see Supplementary Data 1 for peptide sequences): Histidine substitutions generally result in more potent and higher efficacious counterscreen activity.

| Peptide ID | Trivial Name           | TETCHO Counterscreen (4 hours, 0% serum) |          |
|------------|------------------------|------------------------------------------|----------|
|            |                        | EC50 ( $\mu$ M)                          | % Effect |
| MP-081     | AZIDE-ATSP-7041        | >50                                      | 15.0     |
| MP-173     | AZIDE-ATSP-7041 (L1H)  | 21.7                                     | 172.1    |
| MP-174     | AZIDE-ATSP-7041 (T2H)  | 5.9                                      | 277.4    |
| MP-175     | AZIDE-ATSP-7041 (E5H)  | 10.6                                     | 78.52    |
| MP-176     | AZIDE-ATSP-7041 (Q9H)  | 24.4                                     | 222.1    |
| MP-177     | AZIDE-ATSP-7041 (S12H) | 12.0                                     | 234.8    |
| MP-197     | ATSP-7041 (L1H)        | 21.5                                     | 154.7    |
| MP-198     | ATSP-7041 (T2H)        | 13.1                                     | 258.7    |
| MP-199     | ATSP-7041 (E5H)        | 22.7                                     | 110.5    |
| MP-200     | ATSP-7041 (L9H)        | 9.9                                      | 48.83    |
| MP-201     | ATSP-7041 (S12H)       | 16.5                                     | 217.7    |
| MP-496     | AZIDE-ATSP-7041 (A8H)  | 2.8                                      | 34.53    |
| MP-501     | ATSP-7041 (Q8H)        | 18.9                                     | 216      |

Supplementary Table 3 (see Supplementary Data 1 for peptide sequences). P.B. = poor behaved (no value could be discerned). N.D. = No data available

| Peptide ID | Trivial name                              | Partition Coeff | AlogP98 | TETCHO:       | LDH:               | p53 reporter     |              | FP Binding     | Solubility |
|------------|-------------------------------------------|-----------------|---------|---------------|--------------------|------------------|--------------|----------------|------------|
|            |                                           |                 |         | Counterscreen | Cytotoxicity assay | assay: EC50 (nM) |              | (nM)           |            |
|            |                                           |                 |         | 0% FBS 4Hr    | 0% FBS 4Hr         | 0% FBS 4Hr       | 10% FBS 4 Hr | Tween-20       |            |
|            |                                           | LogD            | AlogP98 | EC50 (μM)     | EC50 (μM)          | EC50 (μM)        |              | K <sub>D</sub> | (μM)       |
| MP-081     | AZIDE-ATSP-7041                           | 2.82            | -0.054  | >50           | >50                | 0.49             | 2.5          | 5              | 105        |
| MP-953     | AZIDE-ATSP-7041 (T2A)                     | 2.93            | 0.456   | >50           | >50                | 1.0              | N.D.         | 80.5           | 186        |
| MP-954     | AZIDE-ATSP-7041 (E5A)                     | P.B.            | 1.718   | >50           | >50                | 0.28             | 1.4          | 48.7           | P.B.       |
| MP-955     | AZIDE-ATSP-7041 (Q9A)                     | 2.94            | 0.871   | >50           | >50                | 0.36             | 2.9          | 54.3           | 86.5       |
| MP-8956    | AZIDE-ATSP-7041 (S12A)                    | 2.925           | 0.834   | >50           | >50                | 0.34             | 5.1          | 36.2           | 108        |
| MP-957     | AZIDE-ATSP-7041 (L1A,T2A)                 | 2.695           | -0.775  | >50           | 17.1               | 2.2              | N.D.         | 26.47          | 101        |
| MP-958     | AZIDE-ATSP-7041 (L1A,E5A)                 | 3.13            | 0.486   | >50           | >50                | 0.40             | N.D.         | 41.74          | 5          |
| MP-959     | AZIDE-ATSP-7041 (L1A,Q9A)                 | 2.785           | -0.36   | >50           | 0.98               | 0.44             | N.D.         | 21.14          | 105.5      |
| MP-960     | AZIDE-ATSP-7041 (L1A,S12A)                | 2.76            | -0.398  | >50           | >50                | 0.52             | N.D.         | 16.06          | 101.5      |
| MP-961     | AZIDE-ATSP-7041 (T2A,E5A)                 | P.B.            | 2.228   | >50           | >50                | 0.46             | N.D.         | 272.3          | P.B.       |
| MP-962     | AZIDE-ATSP-7041 (T2A,Q9A)                 | 2.96            | 1.382   | 14.8          | >50                | 0.90             | N.D.         | 79.47          | 77.5       |
| MP-963     | AZIDE-ATSP-7041 (T2A,S12A)                | 2.97            | 1.345   | 35.9          | >50                | 0.66             | N.D.         | 37.07          | 100        |
| MP-964     | AZIDE-ATSP-7041 (E5A,Q9A)                 | 3.77            | 2.643   | >50           | >50                | 0.072            | 0.84         | 37.99          | P.B.       |
| MP-965     | AZIDE-ATSP-7041 (E5A,S12A)                | P.B.            | 2.606   | 41.0          | >50                | 0.044            | 0.96         | 30.9           | P.B.       |
| MP-693     | AZIDE-ATSP-7041 (E5L, A8L)                | 2.925           | 0.834   | >50           | >50                | 0.34             | 5.1          | 36.2           | <1         |
| MP-8966    | AZIDE-ATSP-7041 (Q9A,S12A)                | 2.92            | 1.76    | >50           | >50                | 0.28             | 4.7          | 45.27          | 111        |
| MP-967     | AZIDE-KK-ATSP-7041 (L1A,T2A,E5A,Q9A,S12A) | 2.75            | -0.27   | 18.5          | 16.8               | 14.5             | N.D.         | 156.1          | P.B.       |
| MP-209     | AZIDE-ATSP-7041 (L1A, E5A, Q9A)           | 3.32            | 1.411   | >50           | >50                | 0.089            | 3.0          | 95.99          | 2          |

|        |                                                                      |       |       |      |     |       |      |       |    |
|--------|----------------------------------------------------------------------|-------|-------|------|-----|-------|------|-------|----|
| MP-350 | AZIDE-ATSP-7041 (L1A, E5A, Q9A, S12A)                                | 3.367 | 2.3   | >50  | >50 | 0.068 | 0.17 | 53.93 | 2  |
| MP-694 | AZIDE-ATSP-7041 (L1Y, E5Y, A8Y)                                      | 3.22  | 4.428 | >50  | >50 | 1.0   | 3.8  | 371.1 | 9  |
| MP-490 | AZIDE-ATSP-7041 (L1V, E5V, A8V)                                      | 4     | 3.015 | >50  | >50 | 0.17  | 2.5  | 122.5 | 3  |
| MP-492 | AZIDE-ATSP-7041 (L1F, E5F, A8F)                                      | 4.21  | 5.154 | >50  | >50 | 0.76  | 27.9 | N.D.  | 3  |
| MP-493 | AZIDE-ATSP-7041 (L1 TO D-LEU, E5A, Q9A, W7 TO 6-CLTRP, A13 TO D-ALA) | 3.93  | 3.308 | 19.5 | >50 | 0.062 | 0.46 | 16.9  | <1 |



Supplementary Results: Peptide QC files

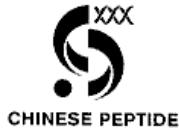

## Certificate of Analysis

**Product Name:** azide-ATSP-7041 (alkyne staple, AA(a-Me-E)AAa tail) **Barcode#:** 0955848658

**Product #:** 994408 **Lot #:** CU-06-00367

**Sequence:** Ac-Lys(N3)-BetaAla-Leu-Thr-Phe-((R)-2-amino-2-methyloct-7-ynoic acid)-Glu-Tyr-Trp-Ala-Gln-Cba-((S)-2-amino-2-methylhept-6-ynoic acid)-Ala-Ala-(alpha MethylGlu)-Ala-Ala-D<sub>2</sub>Ala-NH<sub>2</sub> (alkyne coupling between (R)-2-amino-2-methyloct-7-ynoic acid and (S)-2-amino-2-methylhept-6-ynoic acid)

**Molecular Weight:** 2233.5

**Mass Spectral Analysis:** Electrospray "Exhibits correct MW"  
(see attached MS spectrogram)

**HPLC Analysis:** Peptide purity: 93.7%  
(see attached RP-HPLC chromatogram)

**Solubility:** 1 mg/ml in DMSO

**Appearance:** White lyophilized powder

**Counter Ion:** Ammonium salt

**Cert. of Analysis Remarks:**

**Remarks:** Not for human use, research purpose only.

Quality Assurance By: Hawk Zhu Date: 06/29/21  
Quality Control Department

### Chinese Peptide Company

No. 69,12 Street, Hangzhou Economic & Technological Development Zone, China 310018  
Tel: 86-571-86737011 86737118-8686  
Fax: 86-571-86737013  
Email: sales@chinesepeptide.com  
Website: www.chinesepeptide.com

# QC files for MP-467

**Data file:** D:\DATE\210629\20210629-1 2021-06-29 09-58-04\994408.D  
**Sample name:** 994408  
**Description:** Lot#:CU-06-00367  
MW:2233.5  
Sample Type:Final  
**Acq. method:** 290-2000-Negative-Frag 130v.M

6/29/2021 11:57:10 AM

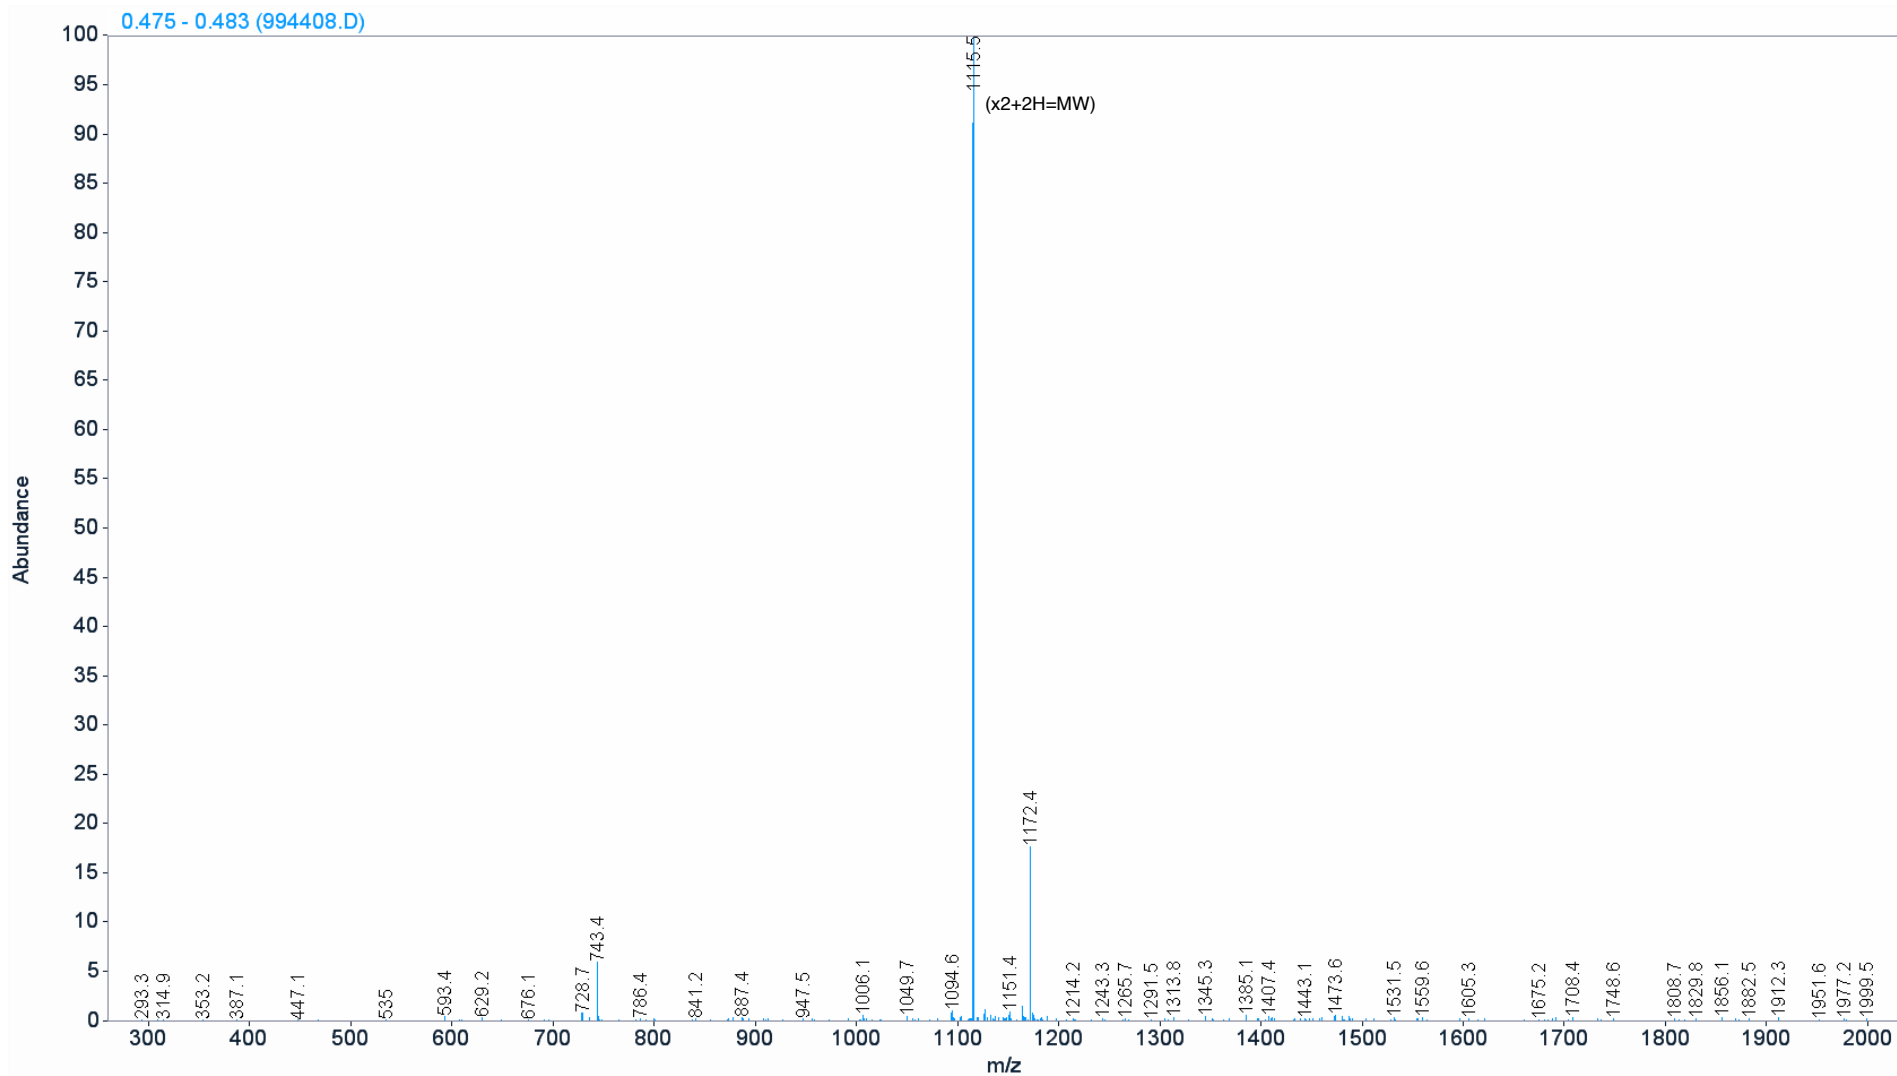

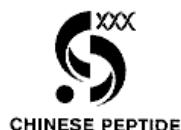

## Certificate of Analysis

**Product Name:** Acetyl-dPMI(5-12 alkyne staple, K9Q, 6xdAla tail) **Barcode#:** 0955845343  
0154692830

**Product #:** 991274 **Lot #:** CT-12-01579

**Sequence:** Ac-DThr-DAla-DTrp(6-F)-DTyr-(S)-2-amino-2-methylhept-6-ynoic acid-DAsn-DPhe(4-CF3)-DGlu-DGln-DLeu-DLeu-(R)-2-amino-2-methyloct-7-ynoic acid-DAla-DAla-DAla-DAla-DAla-DAla-NH<sub>2</sub>(oalkyne coupling between (R)-2-amino-2-methyloct-7-ynoic acid and (S)-2-amino-2-methylhept-6-ynoic acid)

**Molecular Weight:** 2124.3

**Mass Spectral Analysis:** Electrospray "Exhibits correct MW"  
(see attached MS spectrogram)

**HPLC Analysis:** Peptide purity: 94.2%  
(see attached RP-HPLC chromatogram)

**Solubility:** 1 mg/ml in DMSO

**Appearance:** White lyophilized powder

**Counter Ion:** Ammonium salt

**Cert. of Analysis Remarks:**

**Remarks:** Not for human use, research purpose only.

Quality Assurance By: Hawk Zhu Date: 03/09/21  
Quality Control Department

### Chinese Peptide Company

No. 69,12 Street, Hangzhou Economic & Technological Development Zone, China 310018  
Tel: 86-571-86737011 86737118-8686  
Fax: 86-571-86737013  
Email: sales@chinesepeptide.com  
Website: www.chinesepeptide.com

Sample ID:991274 Lot:CT-12-01579

Mobile phase:A:0.1% TFA in H2O

B:0.09% TFA in (80%ACN+20%H2O)

Flow:1.0 ml/min 54.0%-64.0% B buffer in 20 min

Column:Phenomenex C18(2) 5u 100A 4.6\*150mm A1112#

QC files for MP-793

```

===== >
Injection Date   : 3/8/2021                Location      :      Vial 61
Sample Name     : Final                    Inj. Vol.    :      10 µl
Acq Operator    : ZWJ
Acq. Method     : Final.M
Analysis Method : C:\HPCHEM\1\METHODS\FINAL.M
  
```

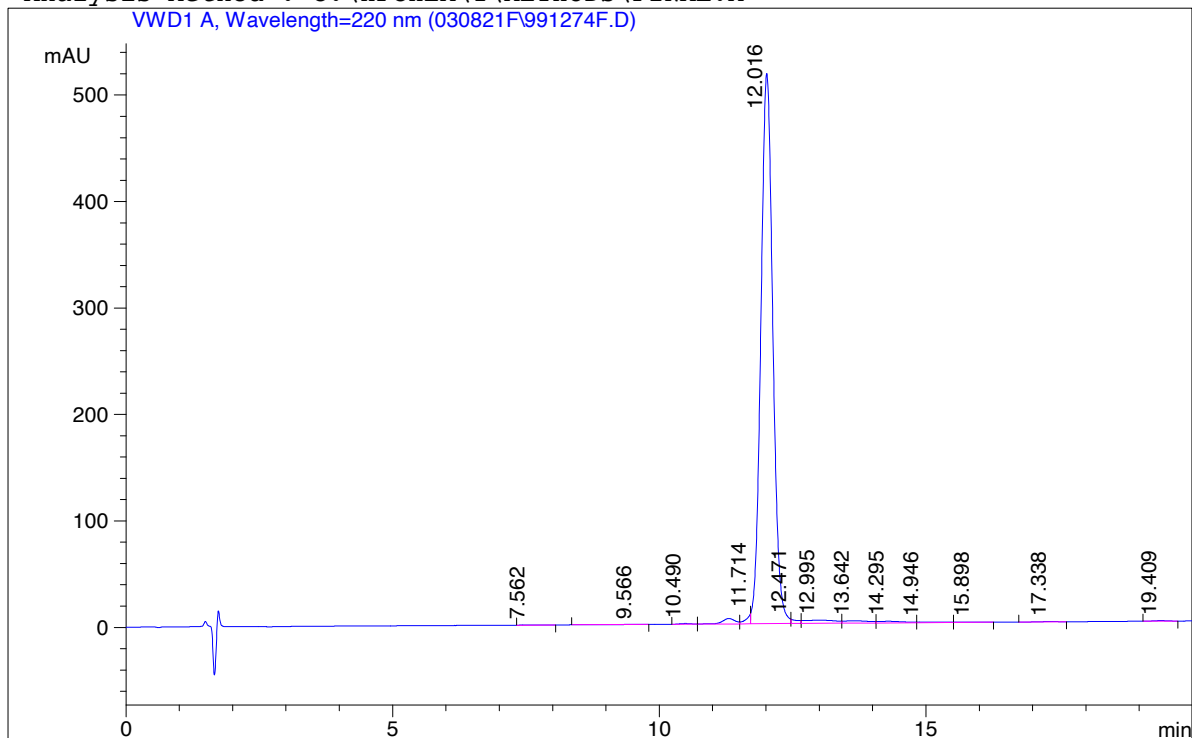

```

===== >

```

| Peak # | Signal RT [min] | 1:VWD1 A, Type | Wavelength=220 nm Width [min] | Height  | Area     | Area % |
|--------|-----------------|----------------|-------------------------------|---------|----------|--------|
| 1      | 7.562           | MM             | 0.280                         | 0.193   | 3.242    | 0.038  |
| 2      | 9.566           | MM             | 0.728                         | 0.169   | 7.401    | 0.086  |
| 3      | 10.490          | BV             | 0.237                         | 0.680   | 10.436   | 0.122  |
| 4      | 11.306          | VV             | 0.255                         | 5.136   | 86.728   | 1.013  |
| 5      | 11.714          | VV             | 0.088                         | 10.049  | 52.796   | 0.617  |
| 6      | 12.016          | VF             | 0.241                         | 515.641 | 8068.768 | 94.270 |
| 7      | 12.471          | VV             | 0.144                         | 4.066   | 35.154   | 0.411  |
| 8      | 12.995          | VV             | 0.595                         | 3.022   | 122.490  | 1.431  |
| 9      | 13.642          | VV             | 0.455                         | 2.346   | 75.005   | 0.876  |
| 10     | 14.295          | VV             | 0.479                         | 1.575   | 52.057   | 0.608  |
| 11     | 14.946          | VV             | 0.446                         | 0.529   | 17.055   | 0.199  |
| 12     | 15.898          | VV             | 0.476                         | 0.264   | 9.566    | 0.112  |
| 13     | 17.338          | VV             | 0.377                         | 0.350   | 8.518    | 0.100  |
| 14     | 19.409          | VP             | 0.297                         | 0.527   | 10.010   | 0.117  |

```

===== >

```

\*\*\* End of Report \*\*\*

# QC files for MP-793

**Data file:** D:\DATE\210308\20210308-3 2021-03-08 14-02-21\991274F.D  
**Sample name:** 991274  
**Description:** Lot#:CT-12-01579  
MW:2124.3  
Sample Type:Final  
**Acq. method:** 290-2000-Negative-Frag 130v.M

3/8/2021 2:17:02 PM

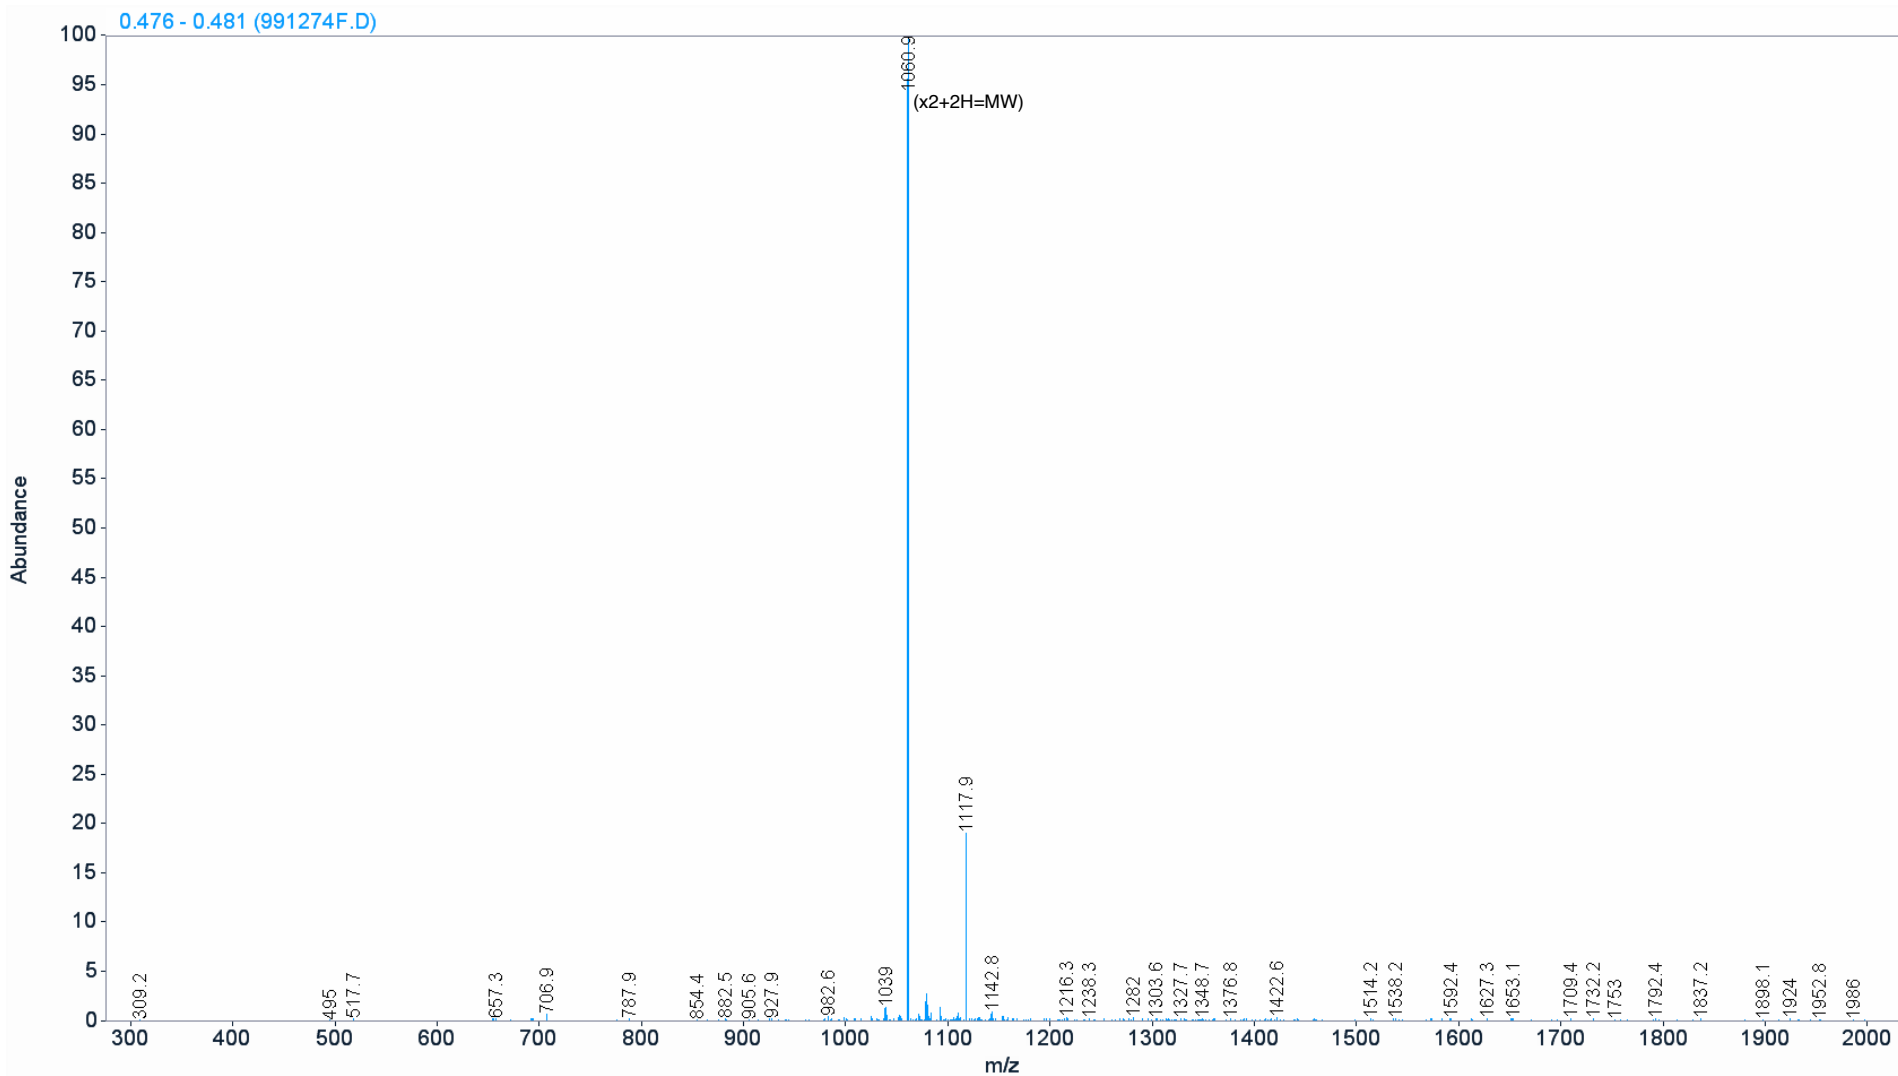

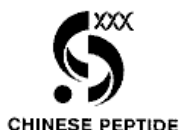

## Certificate of Analysis

**Product Name:** azide-ATSP-7041(alkyne staple, AAAAAa tail) **Barcode#:** 0955842052  
0154692762

**Product #:** 986286 **Lot #:** CT-11-00100

**Sequence:** Ac-Lys(N3)-BetaAla-Leu-Thr-Phe-((R)-2-amino-2-methyloct-7-ynoic acid)-Glu-Tyr-Trp-Ala-Gln-Cba-((S)-2-amino-2-methylhept-6-ynoic acid)-Ala-Ala-Ala-Ala-Ala-D\_Al-NH2 (alkyne coupling between (R)-2-amino-2-methyloct-7-ynoic acid and (S)-2-amino-2-methylhept-6-ynoic acid)

**Molecular Weight:** 2161.5

**Mass Spectral Analysis:** Electrospray "Exhibits correct MW"  
(see attached MS spectrogram)

**HPLC Analysis:** Peptide purity: 95.1%  
(see attached RP-HPLC chromatogram)

**Solubility:** 1 mg/ml in DMSO

**Appearance:** White lyophilized powder

**Counter Ion:** No Salt

**Cert. of Analysis Remarks:**

**Remarks:** Not for human use, research purpose only.

Quality Assurance By: Hawk Zhu Date: 02/19/21  
Quality Control Department

### Chinese Peptide Company

No. 69,12 Street, Hangzhou Economic & Technological Development Zone, China 310018  
Tel: 86-571-86737011 86737118-8686  
Fax: 86-571-86737013  
Email: sales@chinesepeptide.com  
Website: www.chinesepeptide.com

Data file:C:\HPCHEM\1\DATA\021921F\986286F.D  
 Sample ID:986286 Lot:CT-11-00100  
 Mobile phase:A:0.1% TFA in H2O  
 B:0.09% TFA in (80%ACN+20%H2O)  
 Flow:1.0 ml/min 70.0%-80.0% B buffer in 20 min  
 Column:Phenomenex C18(2) 5u 100A 4.6\*150mm A1112#

Sample Name:FINAL

QC files for MP-616

=====>  
 Injection Date : 2/19/2021 Location : Vial 32  
 Sample Name : Final Inj. Vol. : 7 µl  
 Acq Operator : ZWJ  
 Acq. Method : Final.M  
 Analysis Method : C:\HPCHEM\1\METHODS\FINAL.M

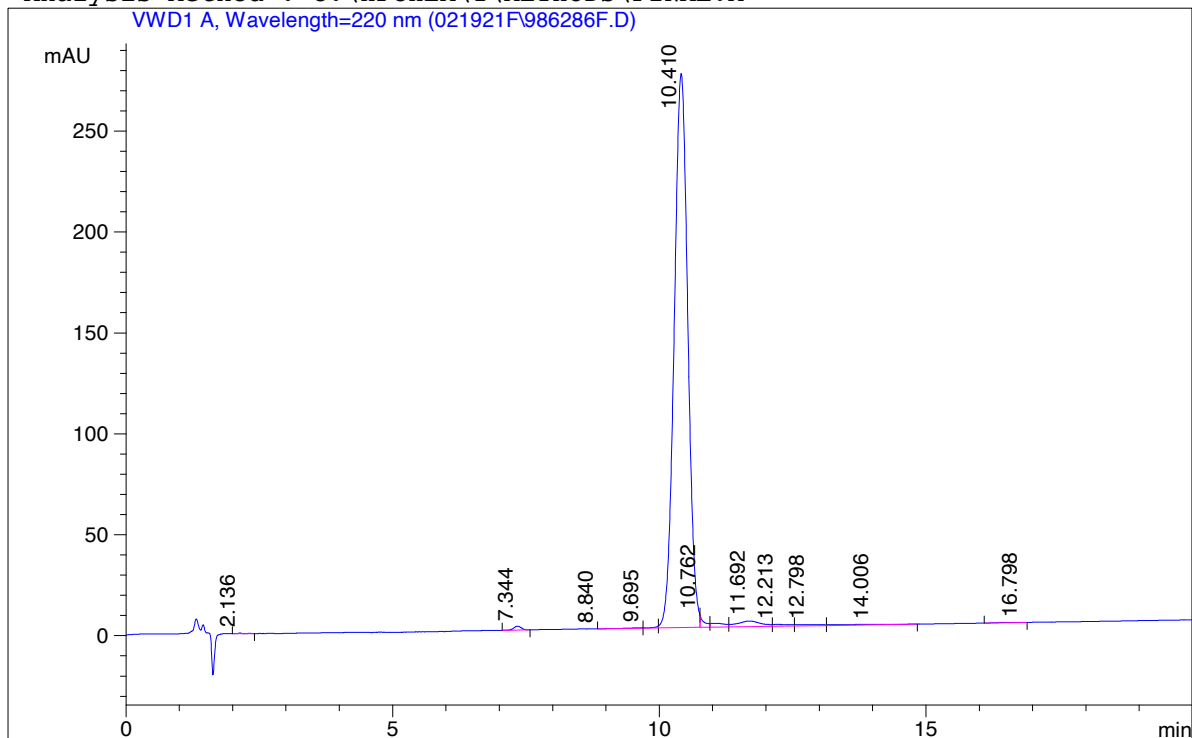

=====>

| Peak # | Signal RT [min] | 1:VWD1 A, Type | Wavelength=220 nm Width [min] | Height  | Area     | Area % |
|--------|-----------------|----------------|-------------------------------|---------|----------|--------|
| 1      | 2.136           | MM             | 0.168                         | 0.342   | 3.436    | 0.067  |
| 2      | 7.344           | VV             | 0.162                         | 1.973   | 20.430   | 0.400  |
| 3      | 8.840           | VV             | 2.985                         | 0.030   | 5.389    | 0.106  |
| 4      | 9.695           | VV             | 0.576                         | 0.160   | 5.545    | 0.109  |
| 5      | 10.410          | VF             | 0.277                         | 274.189 | 4859.660 | 95.143 |
| 6      | 10.762          | VV             | 0.087                         | 6.073   | 31.673   | 0.620  |
| 7      | 11.058          | VV             | 0.265                         | 1.916   | 35.790   | 0.701  |
| 8      | 11.692          | VV             | 0.452                         | 2.800   | 87.456   | 1.712  |
| 9      | 12.213          | VV             | 0.305                         | 0.867   | 19.211   | 0.376  |
| 10     | 12.798          | VV             | 0.455                         | 0.546   | 18.036   | 0.353  |
| 11     | 14.006          | VV             | 1.281                         | 0.162   | 17.435   | 0.341  |
| 12     | 16.798          | MM             | 1.552                         | 0.039   | 3.674    | 0.072  |

=====>

\*\*\* End of Report \*\*\*



# QC files for MP-616

**Data file:** D:\DATE\210219\20210219-1 2021-02-19 10-00-20\986286F.D  
**Sample name:** 986286  
**Description:** Lot#:CT-11-00100  
MW:2161.5  
Sample Type:Final  
**Acq. method:** 290-2000-Negative-Frag 130v.M

2/19/2021 12:48:02 PM

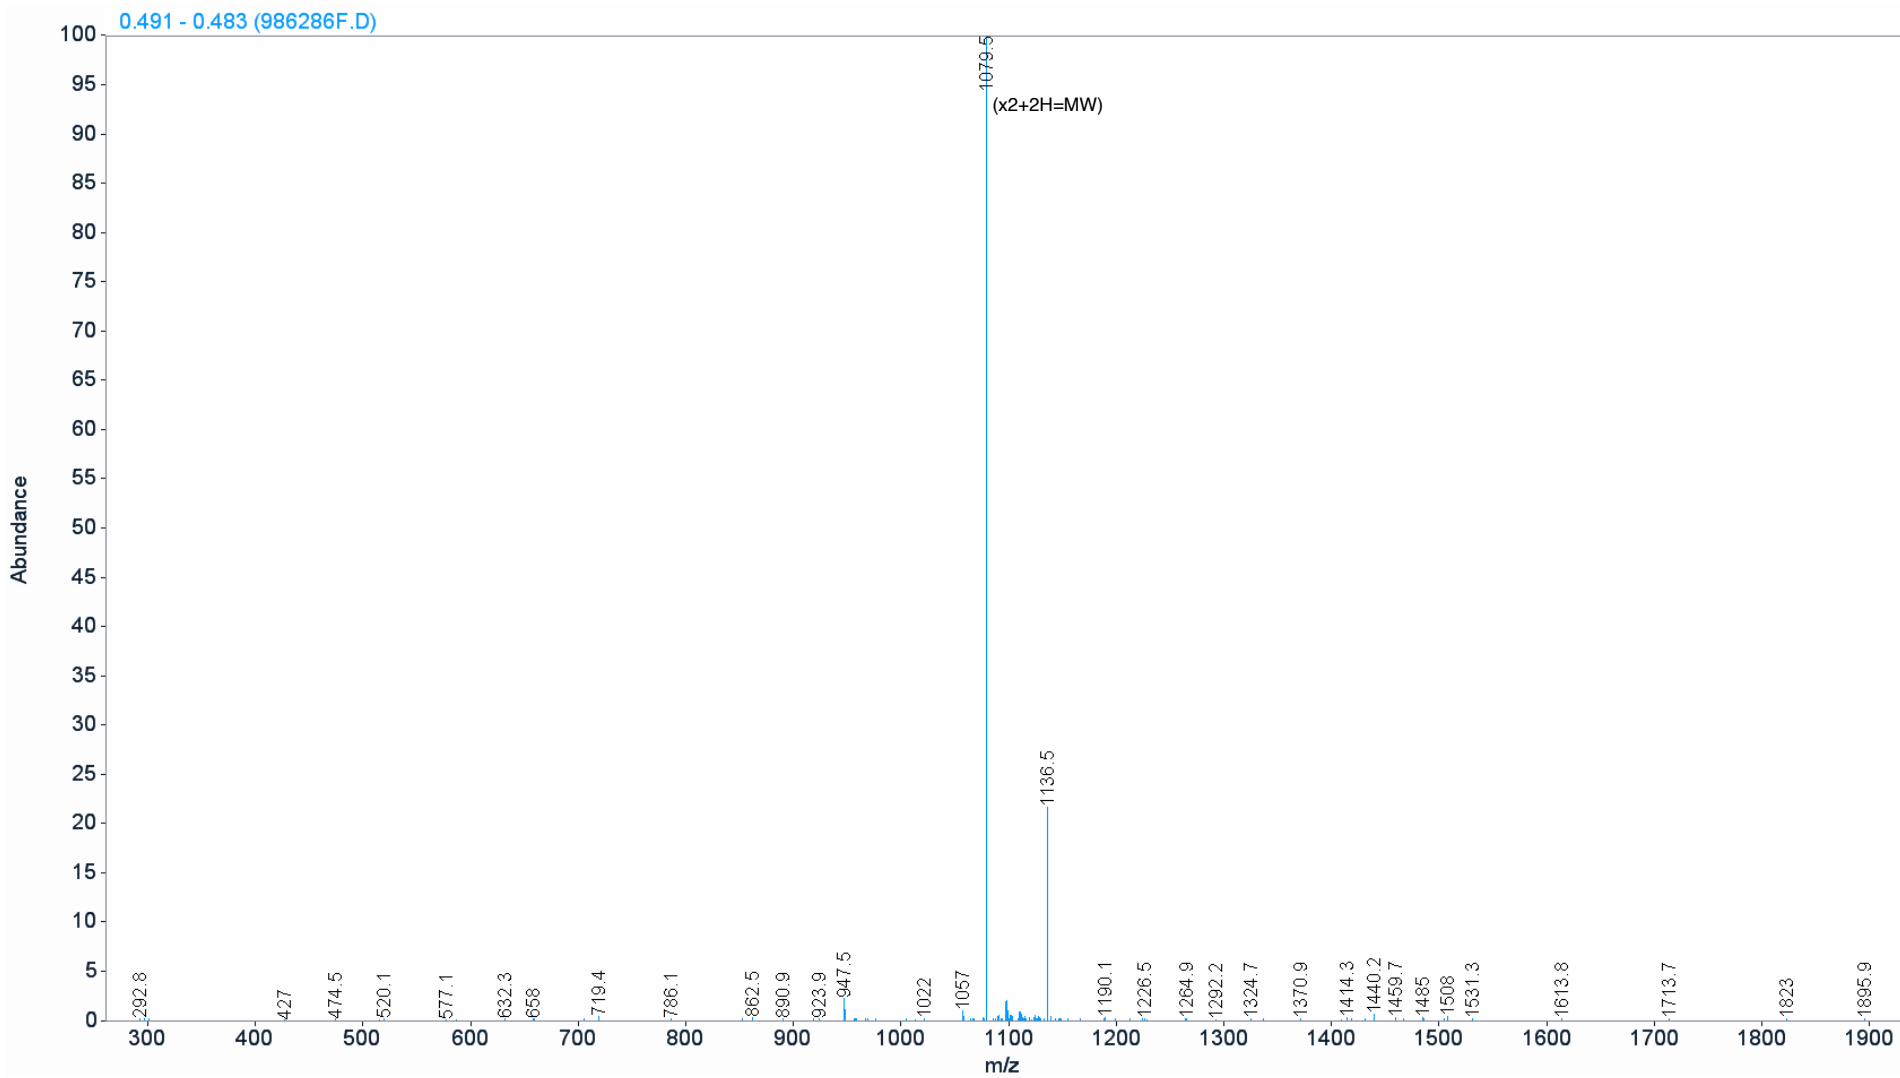

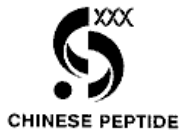

## Certificate of Analysis

**Product Name:** putative-6924      **Barcode#:** 0955841567  
0154691598

**Product #:** 991264      **Lot #:** CT-12-01589

**Sequence:** Ac-Leu-Thr-Phe-R8-Glu-Tyr-Trp-Ala-Gln-Leu-S5-Ala-Ala  
-Ala-Ala-Ala-DAla-NH2 (olefin staple from R8 to S5)

**Molecular Weight:** 1930.3

**Mass Spectral Analysis:** Electrospray "Exhibits correct MW"  
(see attached MS spectrogram)

**HPLC Analysis:** Peptide purity: 97.8%  
(cis/trans isomers mixture see attached RP-HPLC chromatogram)

**Solubility:** 1 mg/ml in DMSO

**Appearance:** White lyophilized powder

**Counter Ion:** Ammonium salt

**Cert. of Analysis Remarks:**

**Remarks:** Not for human use, research purpose only.

Quality Assurance By: Hawk Zhu      Date: 01/19/21  
Quality Control Department

### Chinese Peptide Company

No. 69,12 Street, Hangzhou Economic & Technological Development Zone, China 310018  
Tel: 86-571-86737011 86737118-8686  
Fax: 86-571-86737013  
Email: sales@chinesepeptide.com  
Website: www.chinesepeptide.com

Data file:C:\HPCHEM\1\DATA\011821F\991264F.D  
 Sample ID:991264 Lot:CT-12-01589  
 Mobile phase:A:0.1% TFA in H2O  
 B:0.09% TFA in (80%ACN+20%H2O)  
 Flow:1.0 ml/min 82.0%-92.0% B buffer in 20 min  
 Column:Phenomenex C18(2) 5u 100A 4.6\*150mm A1112#

Sample Name:FINAL

QC files for MP-4897 (ALRN-6924)

=====>  
 Injection Date : 1/18/2021 Location : Vial 3  
 Sample Name : Final Inj. Vol. : 10 µl  
 Acq Operator : ZWJ  
 Acq. Method : Final.M  
 Analysis Method : C:\HPCHEM\1\METHODS\FINAL.M

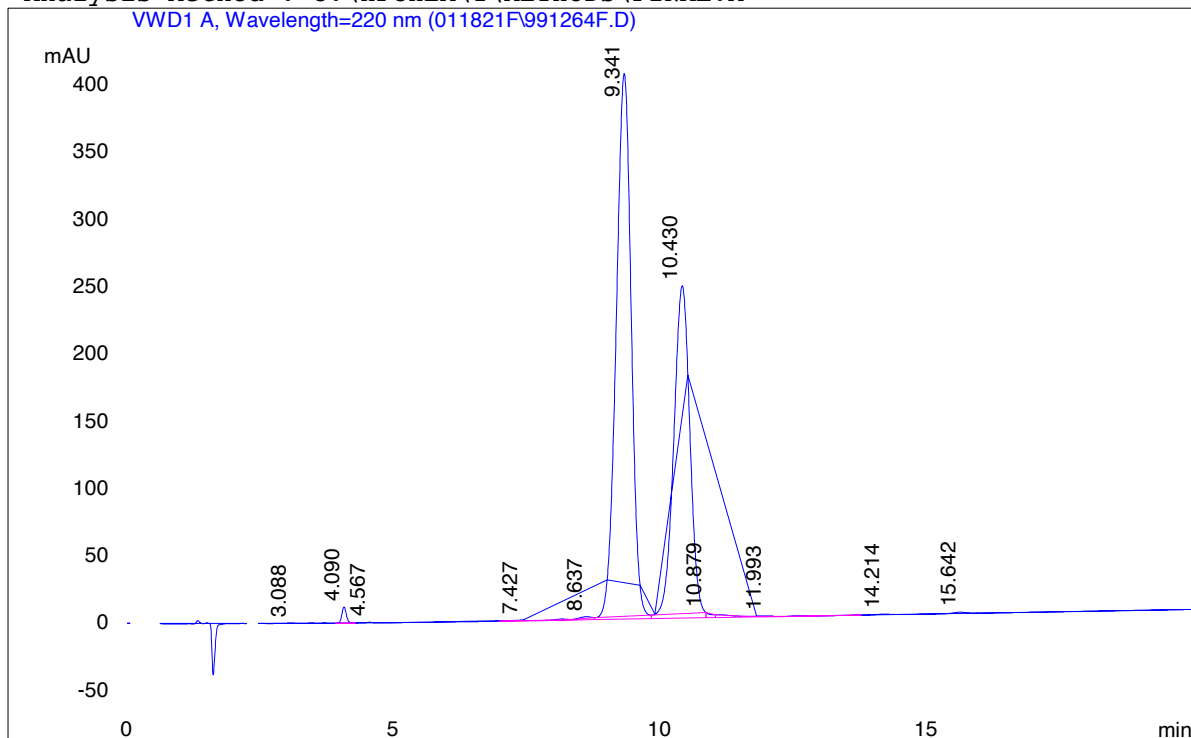

=====>

| Peak # | Signal RT [min] | 1:VWD1 A, Wavelength=220 nm Type | Width [min] | Height  | Area     | Area % |
|--------|-----------------|----------------------------------|-------------|---------|----------|--------|
| 1      | 3.088           | MM                               | 0.454       | 0.298   | 8.105    | 0.060  |
| 2      | 4.090           | VV                               | 0.099       | 11.928  | 71.092   | 0.526  |
| 3      | 4.567           | VP                               | 0.158       | 0.551   | 5.527    | 0.041  |
| 4      | 7.427           | VV                               | 0.239       | 0.449   | 7.156    | 0.053  |
| 5      | 8.183           | VV                               | 0.296       | 0.886   | 17.648   | 0.131  |
| 6      | 8.637           | VV                               | 0.272       | 2.340   | 41.712   | 0.309  |
| 7      | 9.341           | VV                               | 0.311       | 404.993 | 7968.135 | 58.992 |
| 8      | 10.430          | VF                               | 0.330       | 246.875 | 5249.694 | 38.866 |
| 9      | 10.879          | VF                               | 0.118       | 3.806   | 26.946   | 0.199  |
| 10     | 11.053          | VV                               | 0.375       | 2.140   | 48.158   | 0.357  |
| 11     | 11.993          | VV                               | 0.426       | 0.614   | 18.754   | 0.139  |
| 12     | 13.791          | VV                               | 2.450       | 0.099   | 14.518   | 0.107  |
| 13     | 14.214          | VV                               | 0.283       | 0.616   | 11.556   | 0.086  |
| 14     | 15.642          | VV                               | 0.280       | 1.008   | 18.158   | 0.134  |

=====  
 \*\*\* End of Report \*\*\*

# QC files for MP-4897 (ALRN-6924)

**Data file:** D:\DATE\210118\20210118-1 2021-01-18 11-19-51\991264.D  
**Sample name:** 991264  
**Description:** Lot#:CT-12-01589  
MW:1930.3  
Sample Type:Final  
**Acq. method:** 290-2000-Negative-Frag 130v.M

1/18/2021 3:35:59 PM

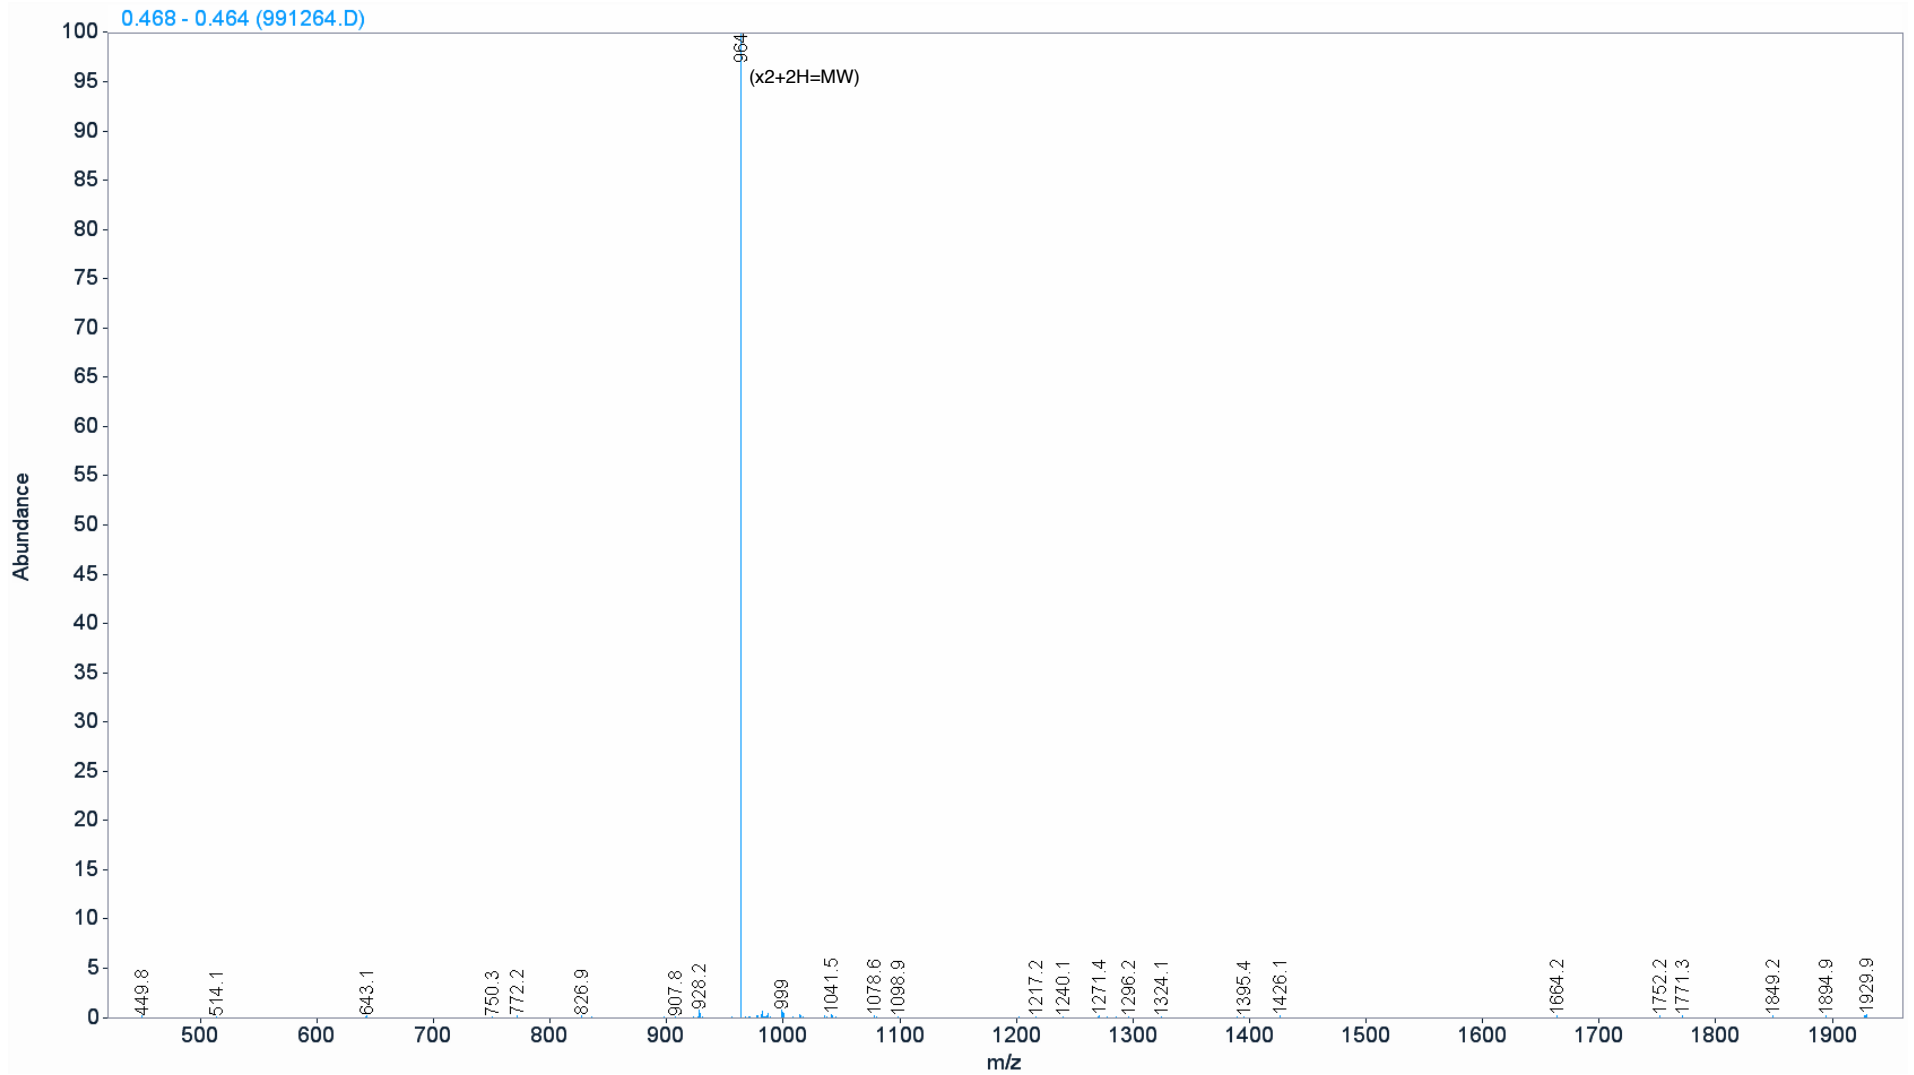



## Certificate of Analysis

**Product Name:** DPMI (6-10) (K9Q, R12S, dAdAdAdAdAdA tail) **Barcode#:** 0953968464

**Product #:** 988999 **Lot #:** CT-08-00054

**Sequence:** Ac-DThr-DAla-DTrp(6-F)-DTyr-DAla-R5-DPhe(4-CF3)  
-DGlu-DGln-R5-DLeu-DSer-DAla-DAla-DAla-DAla-DAla  
-DAla-NH<sub>2</sub>(olefin staple from R5 to R5)

**Molecular Weight:** 2019.2

**Mass Spectral Analysis:** Electrospray "Exhibits correct MW"  
(see attached MS spectrogram)

**HPLC Analysis:** Peptide purity: 90.2%  
(see attached RP-HPLC chromatogram)

**Solubility:** 1 mg/ml in DMSO

**Appearance:** White lyophilized powder

**Counter Ion:** No Salt

**Cert. of Analysis Remarks:**

**Remarks:** Not for human use, research purpose only.

Quality Assurance By: Hawk Zhu Date: 09/09/20  
Quality Control Department

### Chinese Peptide Company

No. 69,12 Street, Hangzhou Economic & Technological Development Zone, China 310018  
Tel: 86-571-86737011 86737118-8686  
Fax: 86-571-86737013  
Email: sales@chinesepeptide.com  
Website: www.chinesepeptide.com

Sample ID:988999 Lot:CT-08-00054

Mobile phase:A:0.1% TFA in H2O

B:0.09% TFA in (80%ACN+20%H2O)

Flow:1.0 ml/min 62.0%-72.0% B buffer in 20 min

Column:Phenomenex C18(2) 5u 100A 4.6\*150mm A1112#

QC files for MP-042

```

===== >
Injection Date   : 9/7/2020                Location      :      Vial 34
Sample Name     : Final                    Inj. Vol.    :      10 µl
Acq Operator    : ZWJ
Acq. Method     : Final.M
Analysis Method : C:\HPCHEM\1\METHODS\FINAL.M
  
```

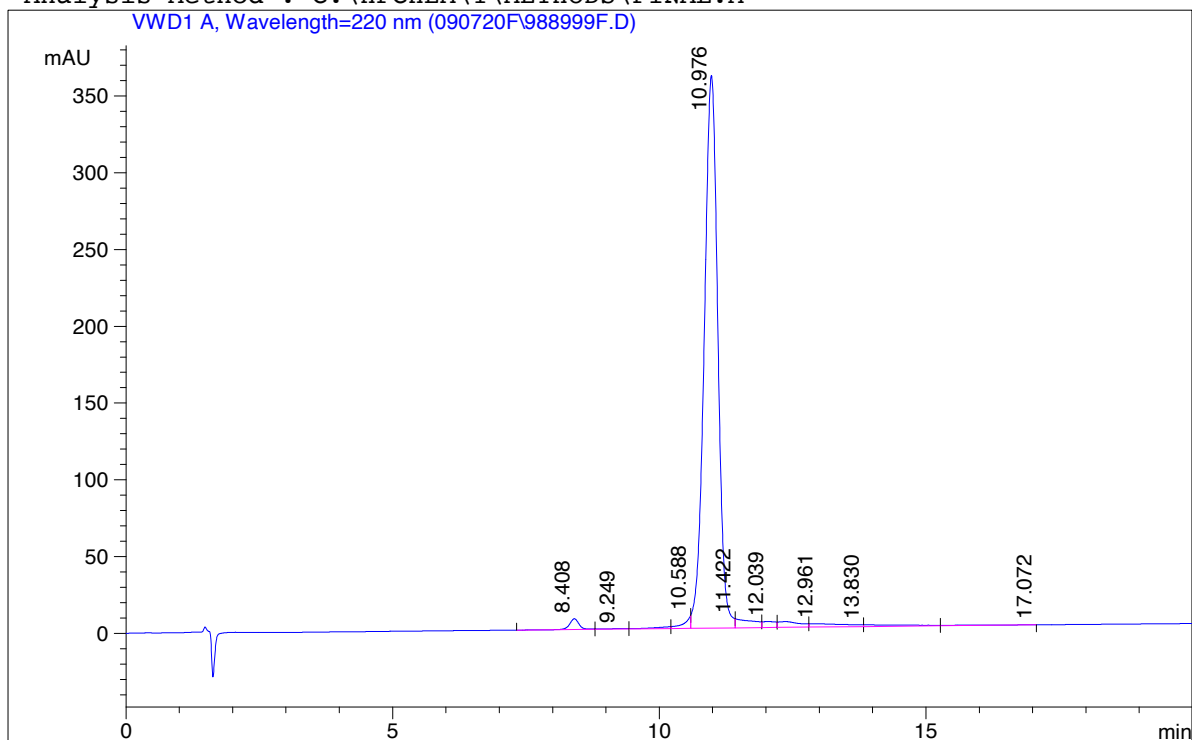

```

===== >
  
```

| Peak # | Signal RT [min] | 1:VWD1 A, Type | Wavelength=220 nm Width [min] | Height  | Area     | Area % |
|--------|-----------------|----------------|-------------------------------|---------|----------|--------|
| 1      | 8.408           | VV             | 0.194                         | 7.019   | 88.786   | 1.260  |
| 2      | 9.249           | VV             | 0.367                         | 0.366   | 9.870    | 0.140  |
| 3      | 10.219          | VV             | 0.359                         | 1.268   | 27.277   | 0.387  |
| 4      | 10.588          | VV             | 0.133                         | 8.425   | 67.304   | 0.955  |
| 5      | 10.976          | VF             | 0.276                         | 359.441 | 6358.549 | 90.248 |
| 6      | 11.422          | VV             | 0.387                         | 5.992   | 139.228  | 1.976  |
| 7      | 12.039          | VV             | 0.236                         | 3.896   | 65.221   | 0.926  |
| 8      | 12.361          | VV             | 0.401                         | 3.769   | 107.007  | 1.519  |
| 9      | 12.961          | VF             | 0.651                         | 2.124   | 103.732  | 1.472  |
| 10     | 13.830          | VV             | 0.872                         | 1.185   | 61.984   | 0.880  |
| 11     | 17.072          | VV             | 25.829                        | 0.011   | 16.691   | 0.237  |

```

===== >
  
```

```

===== >
*** End of Report ***
  
```

# QC files for MP-042

**Data file:** D:\DATE\200907\20200907-1 2020-09-07 10-34-41\988999.D  
**Sample name:** 988999  
**Description:** Lot#:CT-08-00054  
MW:2019.2  
Sample Type:Final  
**Acq. method:** 290-2000-Negative-Frag 130v.M

9/7/2020 11:42:39 AM

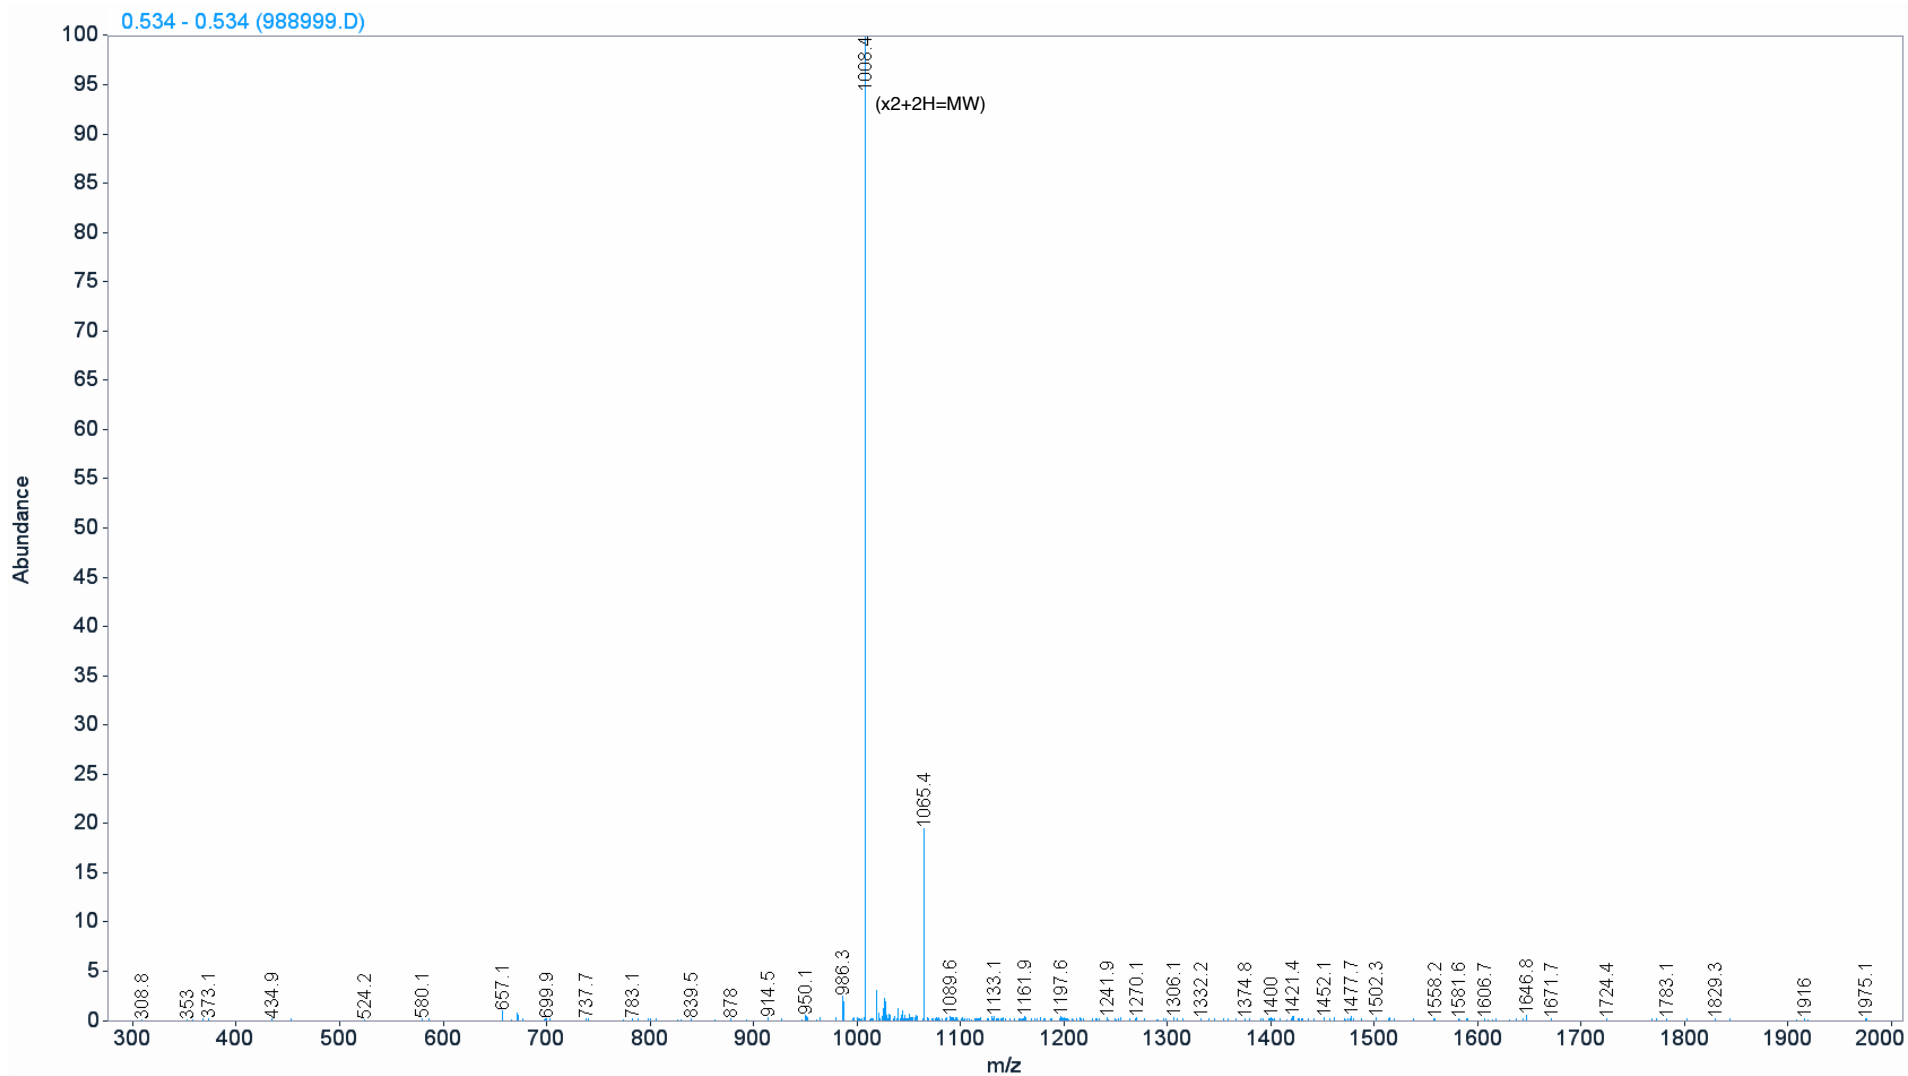



## Certificate of Analysis

**Product Name:** Acetyl-DPML (6-10) (K9Q, R12S)      **Barcode#:** 0955004740  
0154300124

**Product #:** 987308      **Lot #:** CT-04-00926

**Sequence:** Ac-DThr-DAla-DTrp(6-F)-DTyr-DAla-R5-DPhe(4-CF3)-DGlu  
-DGln-R5-DLeu-DSer-NH2 (olefin staple from R5 to R5)

**Molecular Weight:** 1592.7

**Mass Spectral Analysis:** Electrospray "Exhibits correct MW"  
(see attached MS spectrogram)

**HPLC Analysis:** Peptide purity: 91.8%  
(see attached RP-HPLC chromatogram)

**Solubility:** 1 mg/ml in DMSO

**Appearance:** Off-white lyophilized powder

**Counter Ion:** No Salt

**Cert. of Analysis Remarks:**

**Remarks:** Not for human use, research purpose only.

Quality Assurance By: Hawk Zhu      Date: 05/07/20  
Quality Control Department

### Chinese Peptide Company

No. 69,12 Street, Hangzhou Economic & Technological Development Zone, China 310018  
Tel: 86-571-86737011 86737118-8686  
Fax: 86-571-86737013  
Email: sales@chinesepeptide.com  
Website: www.chinesepeptide.com



Sample ID:987308 Lot:CT-04-00926

Mobile phase:A:0.1% TFA in H2O

B:0.09% TFA in (80%ACN+20%H2O)

Flow:1.0 ml/min 56.0%-66.0% B buffer in 20min

Column:Phenomenex C18(2) 5u 100A 4.6\*150mm A1112#

## QC files for MP-797

```

=====
Injection Date   : 5/4/2020                Location    :      Vial 71
Sample Name     : Final                    Inj. Vol.  :      10 µl
Acq Operator    : ZWJ
Acq. Method     : Final.M
Analysis Method : C:\HPCHEM\1\METHODS\FINAL.M
  
```

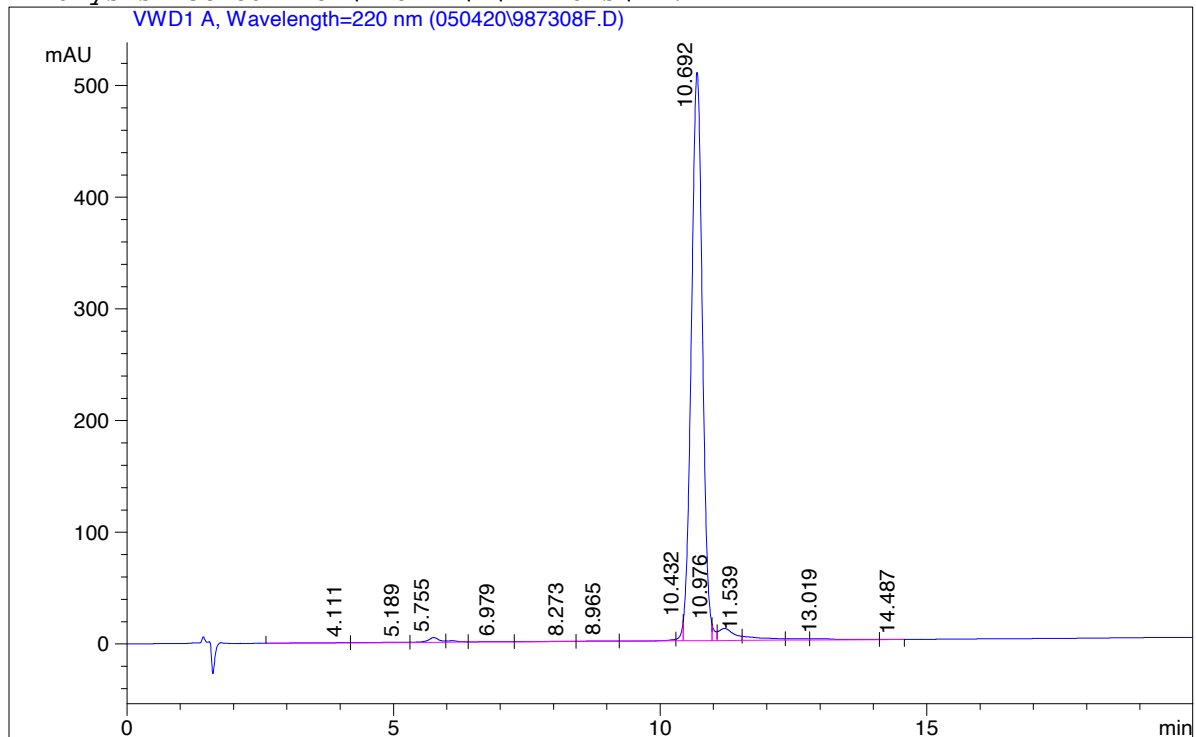

| Peak # | Signal RT [min] | 1:VWD1 A, Type | Wavelength=220 nm Width [min] | Height  | Area     | Area % |
|--------|-----------------|----------------|-------------------------------|---------|----------|--------|
| 1      | 4.111           | VV             | 0.786                         | 0.213   | 13.499   | 0.169  |
| 2      | 5.189           | VV             | 0.650                         | 0.267   | 14.203   | 0.178  |
| 3      | 5.755           | VV             | 0.212                         | 4.280   | 62.723   | 0.788  |
| 4      | 6.099           | VV             | 0.216                         | 1.316   | 19.777   | 0.248  |
| 5      | 6.979           | VV             | 0.459                         | 0.351   | 12.235   | 0.154  |
| 6      | 8.273           | VV             | 0.514                         | 0.195   | 7.832    | 0.098  |
| 7      | 8.965           | VV             | 0.453                         | 0.287   | 10.000   | 0.126  |
| 8      | 10.296          | VV             | 0.159                         | 1.463   | 14.001   | 0.176  |
| 9      | 10.432          | VV             | 0.044                         | 17.260  | 45.820   | 0.575  |
| 10     | 10.692          | VF             | 0.226                         | 507.441 | 7318.391 | 91.892 |
| 11     | 10.976          | VV             | 0.063                         | 14.148  | 53.316   | 0.669  |
| 12     | 11.207          | VF             | 0.280                         | 10.869  | 211.797  | 2.659  |
| 13     | 11.539          | VV             | 0.473                         | 3.646   | 103.571  | 1.300  |
| 14     | 12.579          | VV             | 0.359                         | 1.311   | 33.187   | 0.417  |
| 15     | 13.019          | VV             | 0.482                         | 1.192   | 41.510   | 0.521  |
| 16     | 14.487          | VV             | 0.474                         | 0.066   | 2.236    | 0.028  |

```

=====
*** End of Report ***
  
```

## Qualitative Analysis Report

|                               |                          |                      |                                      |
|-------------------------------|--------------------------|----------------------|--------------------------------------|
| <b>Data Filename</b>          | 987308F1.d               | <b>Sample Name</b>   | 987308                               |
| <b>Sample Type</b>            | Sample                   | <b>Position</b>      | P1-F5                                |
| <b>Instrument Name</b>        | 6530                     | <b>User Name</b>     | SCSCOE6530\justin.jia                |
| <b>Acq Method</b>             | ms1-300-negative.m       | <b>Acquired Time</b> | 5/4/2020 2:44:24 PM                  |
| <b>IRM Calibration Status</b> | Success                  | <b>DA Method</b>     | BioConfirmSyntheticPeptide-Default.m |
| <b>Comment</b>                | Instrument ID:2013110801 |                      |                                      |

|                     |              |                                            |
|---------------------|--------------|--------------------------------------------|
| <b>Sample Group</b> | <b>Info.</b> | Sample:987308 Code:N/A<br>Lot#:CT-04-00926 |
|---------------------|--------------|--------------------------------------------|

**Acquisition SW Version**      6200 series TOF/6500 series  
Q-TOF B.05.01 (B5125.1)

### User Spectra

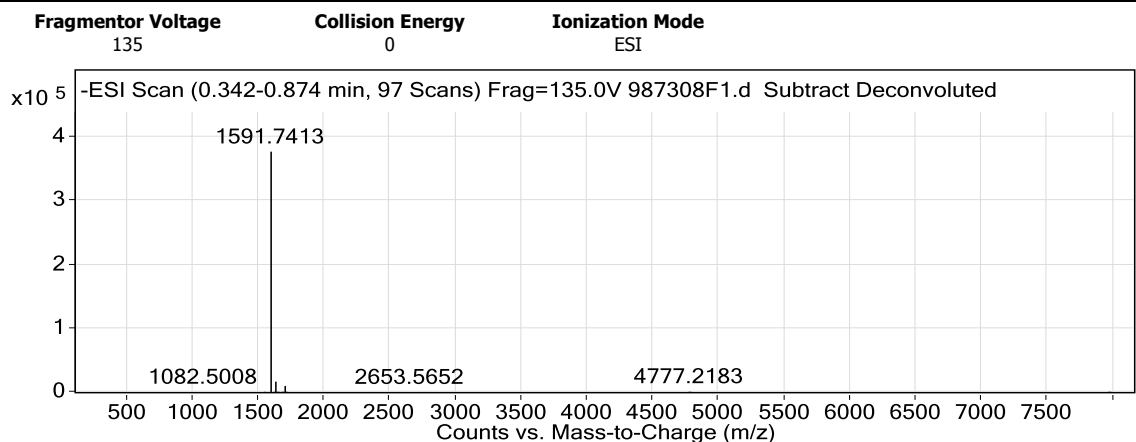

#### Peak List

| <i>m/z</i> | Abund     |
|------------|-----------|
| 1591.7413  | 378216.16 |
| 1592.7443  | 345325.19 |
| 1593.7464  | 166353.91 |
| 1594.7478  | 56887.68  |
| 1595.7486  | 12895.7   |
| 1596.7483  | 2930.2    |
| 1627.7163  | 17661.71  |
| 1628.7188  | 16061.65  |
| 1629.7163  | 14607.41  |
| 1630.7161  | 8851.77   |
| 1631.717   | 3996.8    |
| 1689.7068  | 2919.63   |
| 1705.7442  | 11330.66  |
| 1706.7411  | 10110.76  |
| 1707.7409  | 5045.28   |

--- End Of Report ---



## Certificate of Analysis

**Product Name:** azido-ATSP7041 (F3 to dPhe)      **Barcode#:** 0954308047  
0153962811

**Product #:** 981783      **Lot #:** CS-03-00296

**Sequence:** Ac-Lys(N3)-betaAla-Leu-Thr-DPhe-R8-Glu-Tyr-Trp-Ala-Gln  
-Cba-S5-Ser-Ala-Ala-NH2(olefin staple from R8 to S5)

**Molecular Weight:** 1970.3

**Mass Spectral Analysis:** Electrospray "Exhibits correct MW"  
(see attached MS spectrogram)

**HPLC Analysis:** Peptide purity: 95.2%  
(cis/trans isomers mixture see attached RP-HPLC chromatogram)

**Solubility:** 1 mg/ml in DMSO

**Appearance:** White lyophilized powder

**Counter Ion:** No Salt

**Cert. of Analysis Remarks:**

**Remarks:** Not for human use, research purpose only.

Quality Assurance By: Hawk Zhu      Date: 03/21/19  
Quality Control Department

### Chinese Peptide Company

No. 69,12 Street, Hangzhou Economic & Technological Development Zone, China 310018  
Tel: 86-571-86737011 86737118-8686  
Fax: 86-571-86737013  
Email: sales@chinesepeptide.com  
Website: www.chinesepeptide.com

Data file:C:\HPCHEM\1\DATA\032119\981783F.D  
 Sample ID:981783 Lot:CS-03-00296  
 Mobile phase:A:0.1% TFA in H2O  
 B:0.09% TFA in (80%ACN+20%H2O)  
 Flow:1.0 ml/min 65.0%-75.0% B buffer in 20min  
 Column:Phenomenex C18(2) 5u 100A 4.6\*150mm A1112#

Sample Name:FINAL

QC files for MP-202

=====>  
 Injection Date : 3/21/2019 Location : Vial 22  
 Sample Name : Final Inj. Vol. : 10 µl  
 Acq Operator : ZWJ  
 Acq. Method : Final.M  
 Analysis Method : C:\HPCHEM\1\METHODS\FINAL.M

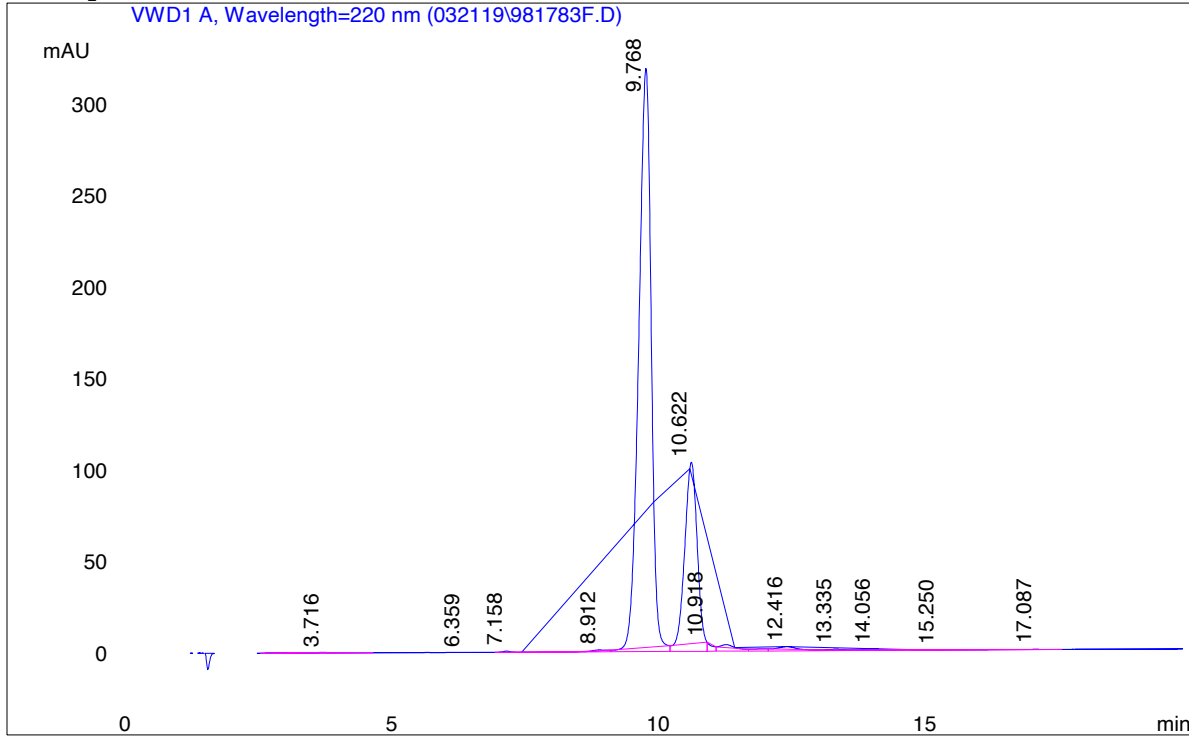

| Peak # | Signal RT [min] | Type | Width [min] | Height  | Area     | Area % |
|--------|-----------------|------|-------------|---------|----------|--------|
| 1      | 3.254           | VV   | 0.398       | 0.256   | 7.579    | 0.104  |
| 2      | 3.716           | VV   | 0.526       | 0.303   | 12.305   | 0.169  |
| 3      | 6.359           | MM   | 1.140       | 0.031   | 2.105    | 0.029  |
| 4      | 6.835           | VV   | 0.205       | 0.092   | 1.200    | 0.016  |
| 5      | 7.158           | VV   | 0.152       | 0.642   | 6.107    | 0.084  |
| 6      | 8.491           | VV   | 0.696       | 0.047   | 1.956    | 0.027  |
| 7      | 8.912           | VV   | 0.335       | 1.023   | 22.193   | 0.305  |
| 8      | 9.768           | VV   | 0.255       | 318.358 | 5212.101 | 71.624 |
| 9      | 10.622          | VF   | 0.265       | 103.188 | 1721.343 | 23.654 |
| 10     | 10.918          | VV   | 0.106       | 4.967   | 31.574   | 0.434  |
| 11     | 11.275          | VV   | 0.333       | 3.565   | 82.208   | 1.130  |
| 12     | 11.951          | VV   | 0.304       | 1.133   | 24.464   | 0.336  |
| 13     | 12.416          | VV   | 0.436       | 2.313   | 71.401   | 0.981  |
| 14     | 13.335          | VV   | 0.473       | 0.747   | 25.440   | 0.350  |
| 15     | 14.056          | VV   | 0.568       | 0.660   | 26.230   | 0.360  |
| 16     | 15.250          | VV   | 0.546       | 0.191   | 8.440    | 0.116  |
| 17     | 17.087          | VV   | 1.349       | 0.181   | 20.423   | 0.281  |

=====  
 \*\*\* End of Report \*\*\*

# QC files for MP-202

**Data file:** D:\DATE\190321\20190321-2 2019-03-21 13-02-59\981783.D  
**Sample name:** 981783  
**Description:** Lot#:CS-03-00296  
MW:1970.3  
Sample Type:Final  
**Acq. method:** 290-2000-Negative-Frag 170v.M

3/21/2019 1:22:50 PM

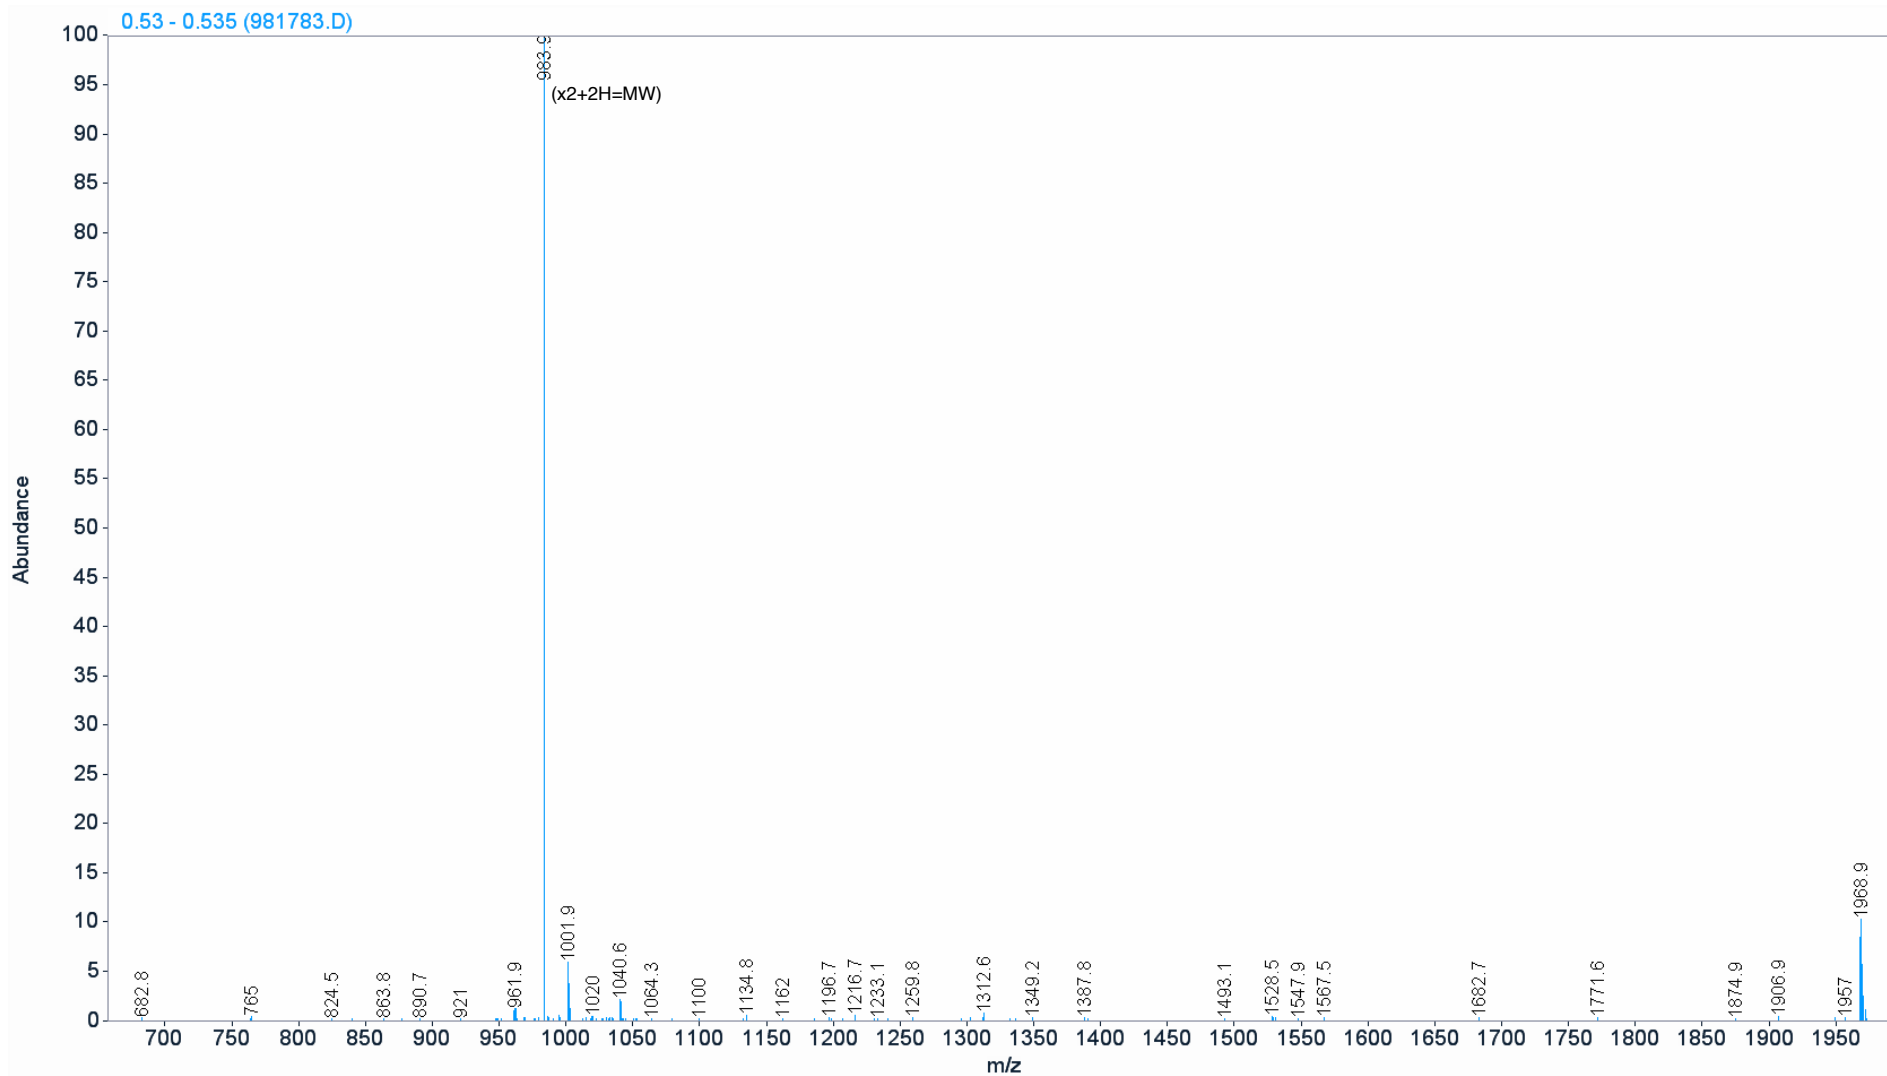



## Certificate of Analysis

**Product Name:** Azide-ATSP-7041 (Mixed)    **Barcode#:** 0953375668  
0153943933

**Product #:** 970027    **Lot #:** CR-12-01058

**Sequence:** Ac-Lys(N3)-betaAla-Leu-Thr-Phe-R8-Glu-Tyr-Trp-Ala-Gln  
-Cba-S5-Ser-Ala-Ala-NH2 (olefin staple from R8 to S5)

**Molecular Weight:** 1970.3

**Mass Spectral Analysis:** Electrospray "Exhibits correct MW"  
(see attached MS spectrogram)

**HPLC Analysis:** Peptide purity: 95.6%  
(cis/trans isomers mixture see attached RP-HPLC chromatogram)

**Solubility:** 1 mg/ml in DMSO

**Appearance:** White lyophilized powder

**Counter Ion:** Ammonium salt

**Cert. of Analysis Remarks:**

**Remarks:** Not for human use, research purpose only.

Quality Assurance By: Hawk Zhu    Date: 01/02/19  
Quality Control Department

### Chinese Peptide Company

No. 69,12 Street, Hangzhou Economic & Technological Development Zone, China 310018  
Tel: 86-571-86737011    86737118-8686  
Fax: 86-571-86737013  
Email: sales@chinesepeptide.com  
Website: www.chinesepeptide.com

Sample ID:970027 Lot:CR-12-01058

Mobile phase:A:0.1% TFA in H2O

B:0.09% TFA in (80%ACN+20%H2O)

Flow:1.0 ml/min 74.0%-84.0% B buffer in 20 min

Column:Phenomenex C18(2) 5u 100A 4.6\*150mm A1112#

QC files for MP-081

```

=====
Injection Date   : 12/29/2018                Location      : Vial 91
Sample Name     : Final                      Inj. Vol.    : 15 µl
Acq Operator    : ZWJ
Acq. Method    : Final.M
Analysis Method : C:\HPCHEM\1\METHODS\FINAL.M
  
```

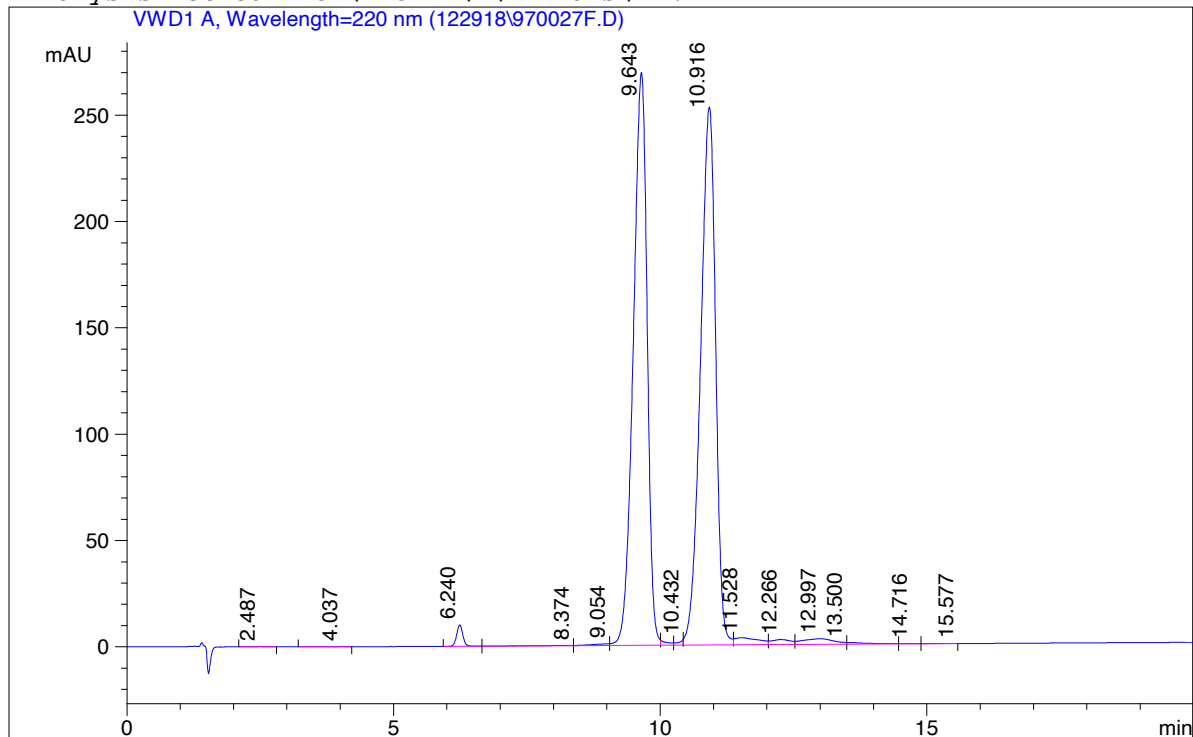

| Peak # | Signal RT [min] | Type | Width [min] | Height  | Area     | Area % |
|--------|-----------------|------|-------------|---------|----------|--------|
| 1      | 2.487           | MM   | 0.217       | 0.173   | 2.248    | 0.022  |
| 2      | 4.037           | MM   | 0.518       | 0.084   | 2.617    | 0.026  |
| 3      | 6.240           | VV   | 0.136       | 9.972   | 81.311   | 0.793  |
| 4      | 8.374           | VV   | 0.728       | 0.112   | 4.914    | 0.048  |
| 5      | 9.054           | VV   | 0.360       | 0.840   | 18.138   | 0.177  |
| 6      | 9.643           | VF   | 0.287       | 268.419 | 4851.902 | 47.299 |
| 7      | 10.005          | VV   | 0.139       | 2.407   | 20.031   | 0.195  |
| 8      | 10.432          | VV   | 0.094       | 2.694   | 15.249   | 0.149  |
| 9      | 10.916          | VV   | 0.311       | 252.755 | 4963.955 | 48.391 |
| 10     | 11.528          | VV   | 0.425       | 3.319   | 102.563  | 1.000  |
| 11     | 12.266          | VV   | 0.359       | 2.367   | 58.577   | 0.571  |
| 12     | 12.997          | VF   | 0.584       | 2.643   | 109.860  | 1.071  |
| 13     | 13.500          | VV   | 0.452       | 0.808   | 21.928   | 0.214  |
| 14     | 14.716          | VV   | 0.356       | 0.110   | 2.759    | 0.027  |
| 15     | 15.577          | VV   | 1.909       | 0.016   | 1.860    | 0.018  |

```

=====
*** End of Report ***
  
```

# QC files for MP-081

**Data file:** D:\DATE\181229\20181229-1 2018-12-29 10-44-55\970027F.D  
**Sample name:** 970027  
**Description:** Lot#:CR-12-01058  
MW:1970.3  
Sample Type:Final  
**Acq. method:** 290-2000-Negative-Frag 170v.M

12/29/2018 1:17:52 PM

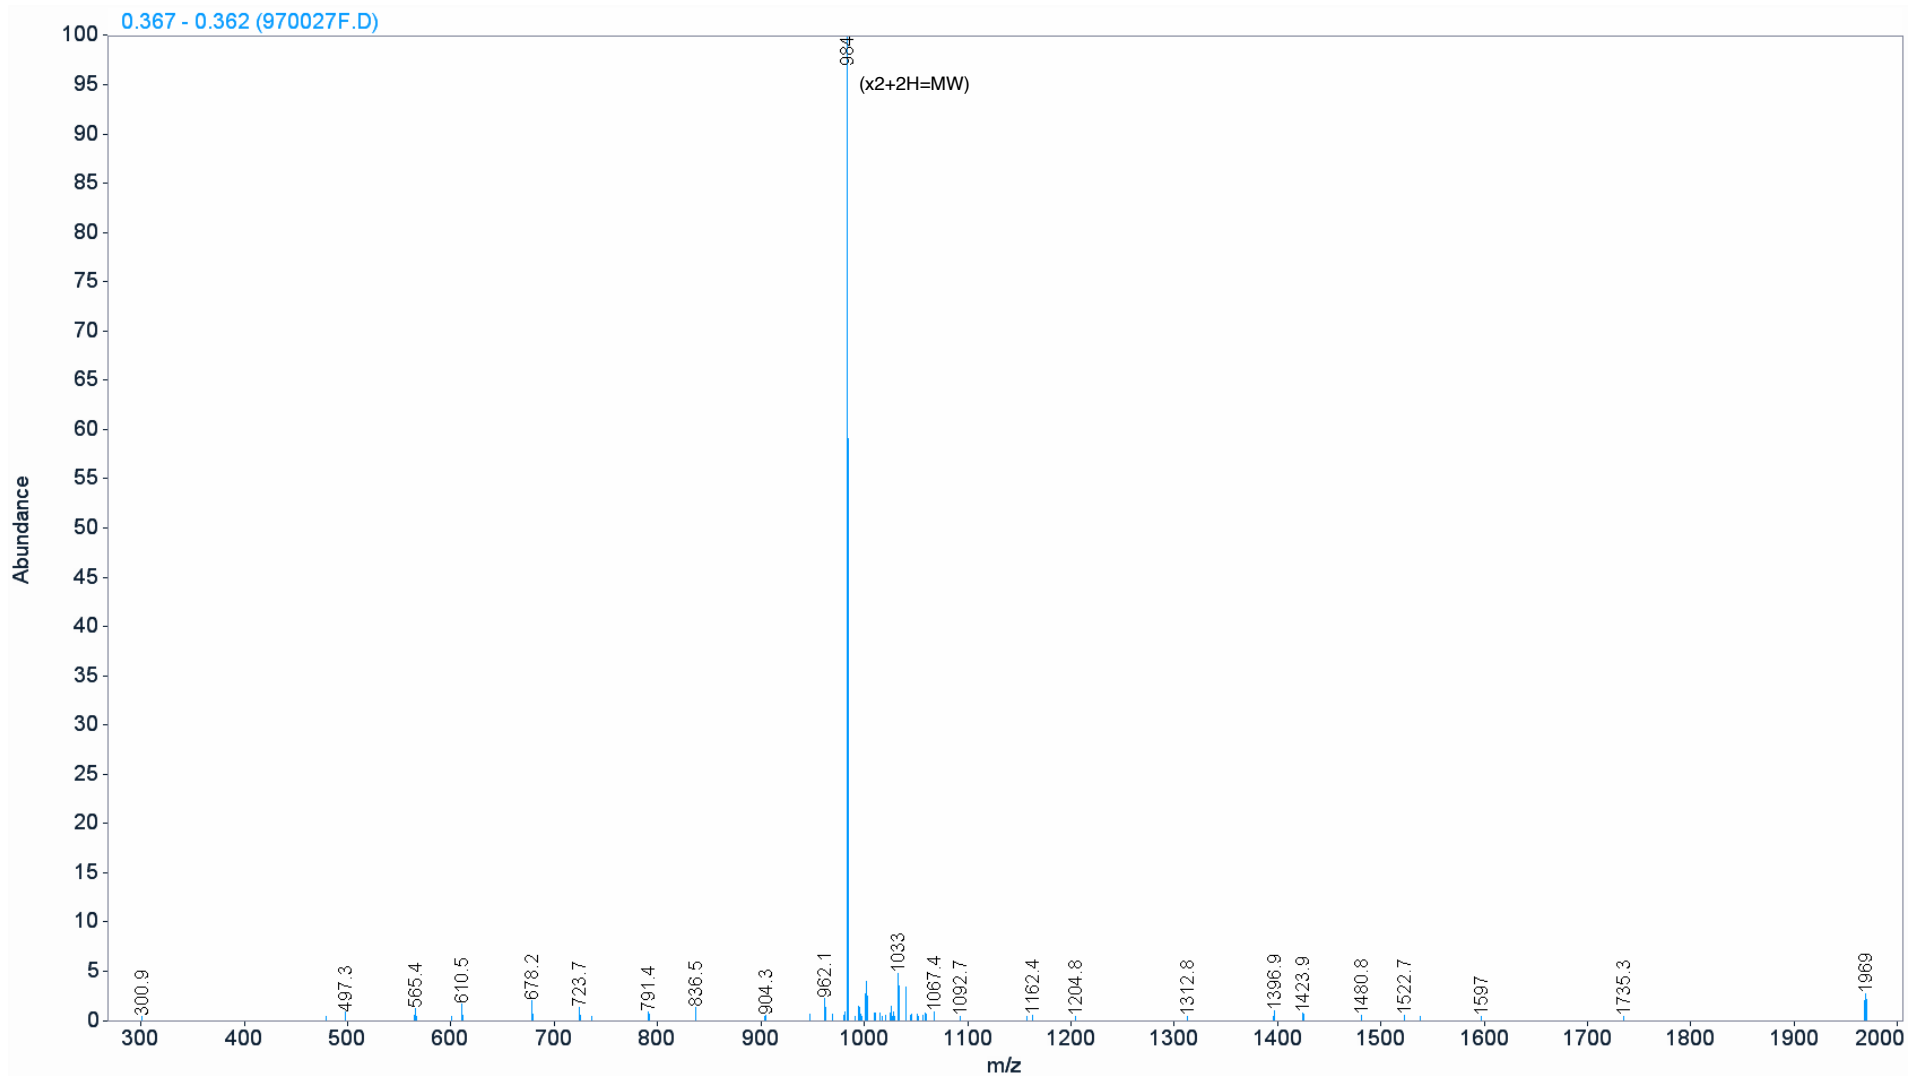





## Certificate of Analysis

**Product Name:** DMPI-delta (5 to 12 staple)    **Barcode#:** 0952506384  
0152555212

**Product #:** 973091    **Lot #:** CQ-03-02804

**Sequence:** H-DThr-DAla-DTrp(6-F)-DTyr-S8-DAsn-DPhe(4-CF3)-DGLu  
-DLys-DLeu-DLeu-R5-NH2 (olefin staple from S8 to R5)

**Molecular Weight:** 1661.9

**Mass Spectral Analysis:** Electrospray "Exhibits correct MW"  
(cis/trans isomers mixture see attached MS spectrogram)

**HPLC Analysis:** Peptide purity: 94.3%  
(see attached RP-HPLC chromatogram)

**Solubility:** 1 mg/ml in DMSO

**Appearance:** White lyophilized powder

**Counter Ion:** Trifluoroacetate

**Cert. of Analysis Remarks:**

**Remarks:** Not for human use, research purpose only.

Quality Assurance By: Hawk Zhu    Date: 04/26/17  
Quality Control Department

### Chinese Peptide Company

No. 69,12 Street, Hangzhou Economic & Technological Development Zone, China 310018  
Tel: 86-571-86737011    86737118-8686  
Fax: 86-571-86737013  
Email: sales@chinesepeptide.com  
Website: www.chinesepeptide.com

Sample ID:973091 Lot#:CQ-03-02804

Mobile Phase:A:0.1% TFA in H2O

B:0.09% TFA in (80%ACN+20%H2O)

Flow:1.0 mL/min 46.0%-56.0% B buffer in 20 min

Column:Phenomenex C18(2) 5u 100A 4.6\*150mm A832# Lot:D0100046

QC files for MP-770

```

=====
Injection Date : 4/25/2017          Location   :      Vial 4
Sample Name    : Final              Inj. Vol.  :      15 µl
Acq Operator   : ZWJ
Acq. Method   : Final.M
Analysis Method : C:\HPCHEM\1\METHODS\FINAL.M
  
```

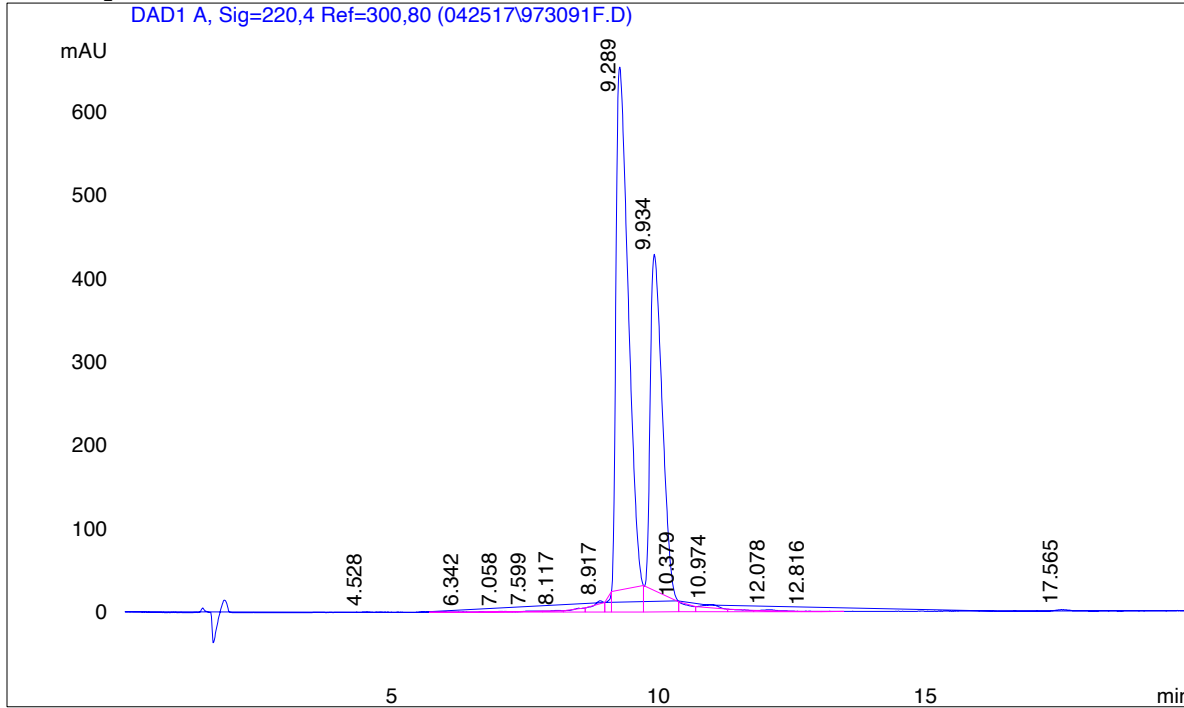

```

=====
Signal 1:DAD1 A, Sig=220,4 Ref=300,80
  
```

| Peak # | RT [min] | Type | Height  | Width [min] | Area      | Area % |
|--------|----------|------|---------|-------------|-----------|--------|
| 1      | 4.528    | BV   | 0.649   | 0.160       | 6.739     | 0.035  |
| 2      | 6.006    | VV   | 0.518   | 0.226       | 7.769     | 0.041  |
| 3      | 6.342    | VV   | 0.509   | 0.224       | 7.253     | 0.038  |
| 4      | 6.694    | VV   | 0.443   | 0.174       | 5.395     | 0.028  |
| 5      | 7.058    | VV   | 0.874   | 0.293       | 17.609    | 0.092  |
| 6      | 7.599    | VV   | 1.356   | 0.311       | 31.691    | 0.166  |
| 7      | 8.117    | VV   | 1.943   | 0.266       | 36.799    | 0.193  |
| 8      | 8.630    | VV   | 4.812   | 0.274       | 79.109    | 0.414  |
| 9      | 8.917    | VV   | 13.452  | 0.211       | 199.111   | 1.042  |
| 10     | 8.993    | VV   | 11.547  | 0.160       | 111.070   | 0.581  |
| 11     | 9.289    | VV   | 646.180 | 0.261       | 10909.525 | 57.089 |
| 12     | 9.934    | VF   | 427.913 | 0.264       | 7117.354  | 37.244 |
| 13     | 10.379   | VV   | 12.189  | 0.215       | 156.887   | 0.821  |
| 14     | 10.974   | VF   | 8.676   | 0.404       | 238.576   | 1.248  |
| 15     | 11.297   | VV   | 3.246   | 0.338       | 65.907    | 0.345  |
| 16     | 12.078   | VV   | 2.212   | 0.442       | 69.253    | 0.362  |
| 17     | 12.816   | VV   | 0.502   | 0.226       | 8.372     | 0.044  |
| 18     | 13.212   | VV   | 0.412   | 0.189       | 5.557     | 0.029  |
| 19     | 17.565   | VV   | 1.720   | 0.314       | 35.847    | 0.188  |

```

=====
  
```

\*\*\* End of Report \*\*\*

973091

Type: Unknown ID: Unknown46 Row: 1

Sample Name:  
Sample Name: 973091  
Lot #: CQ-03-02804  
MW: 1661.9  
Sample Type: FINAL  
Operator: ZWJ  
Instrument Method: D:\data\Method\R&D\MS\MS-290.meth

973091 #9-18 RT: 0.21-0.41 AV: 10 NL: 2.03E8

T: + c ESI Full ms [ 290.00-2000.00]

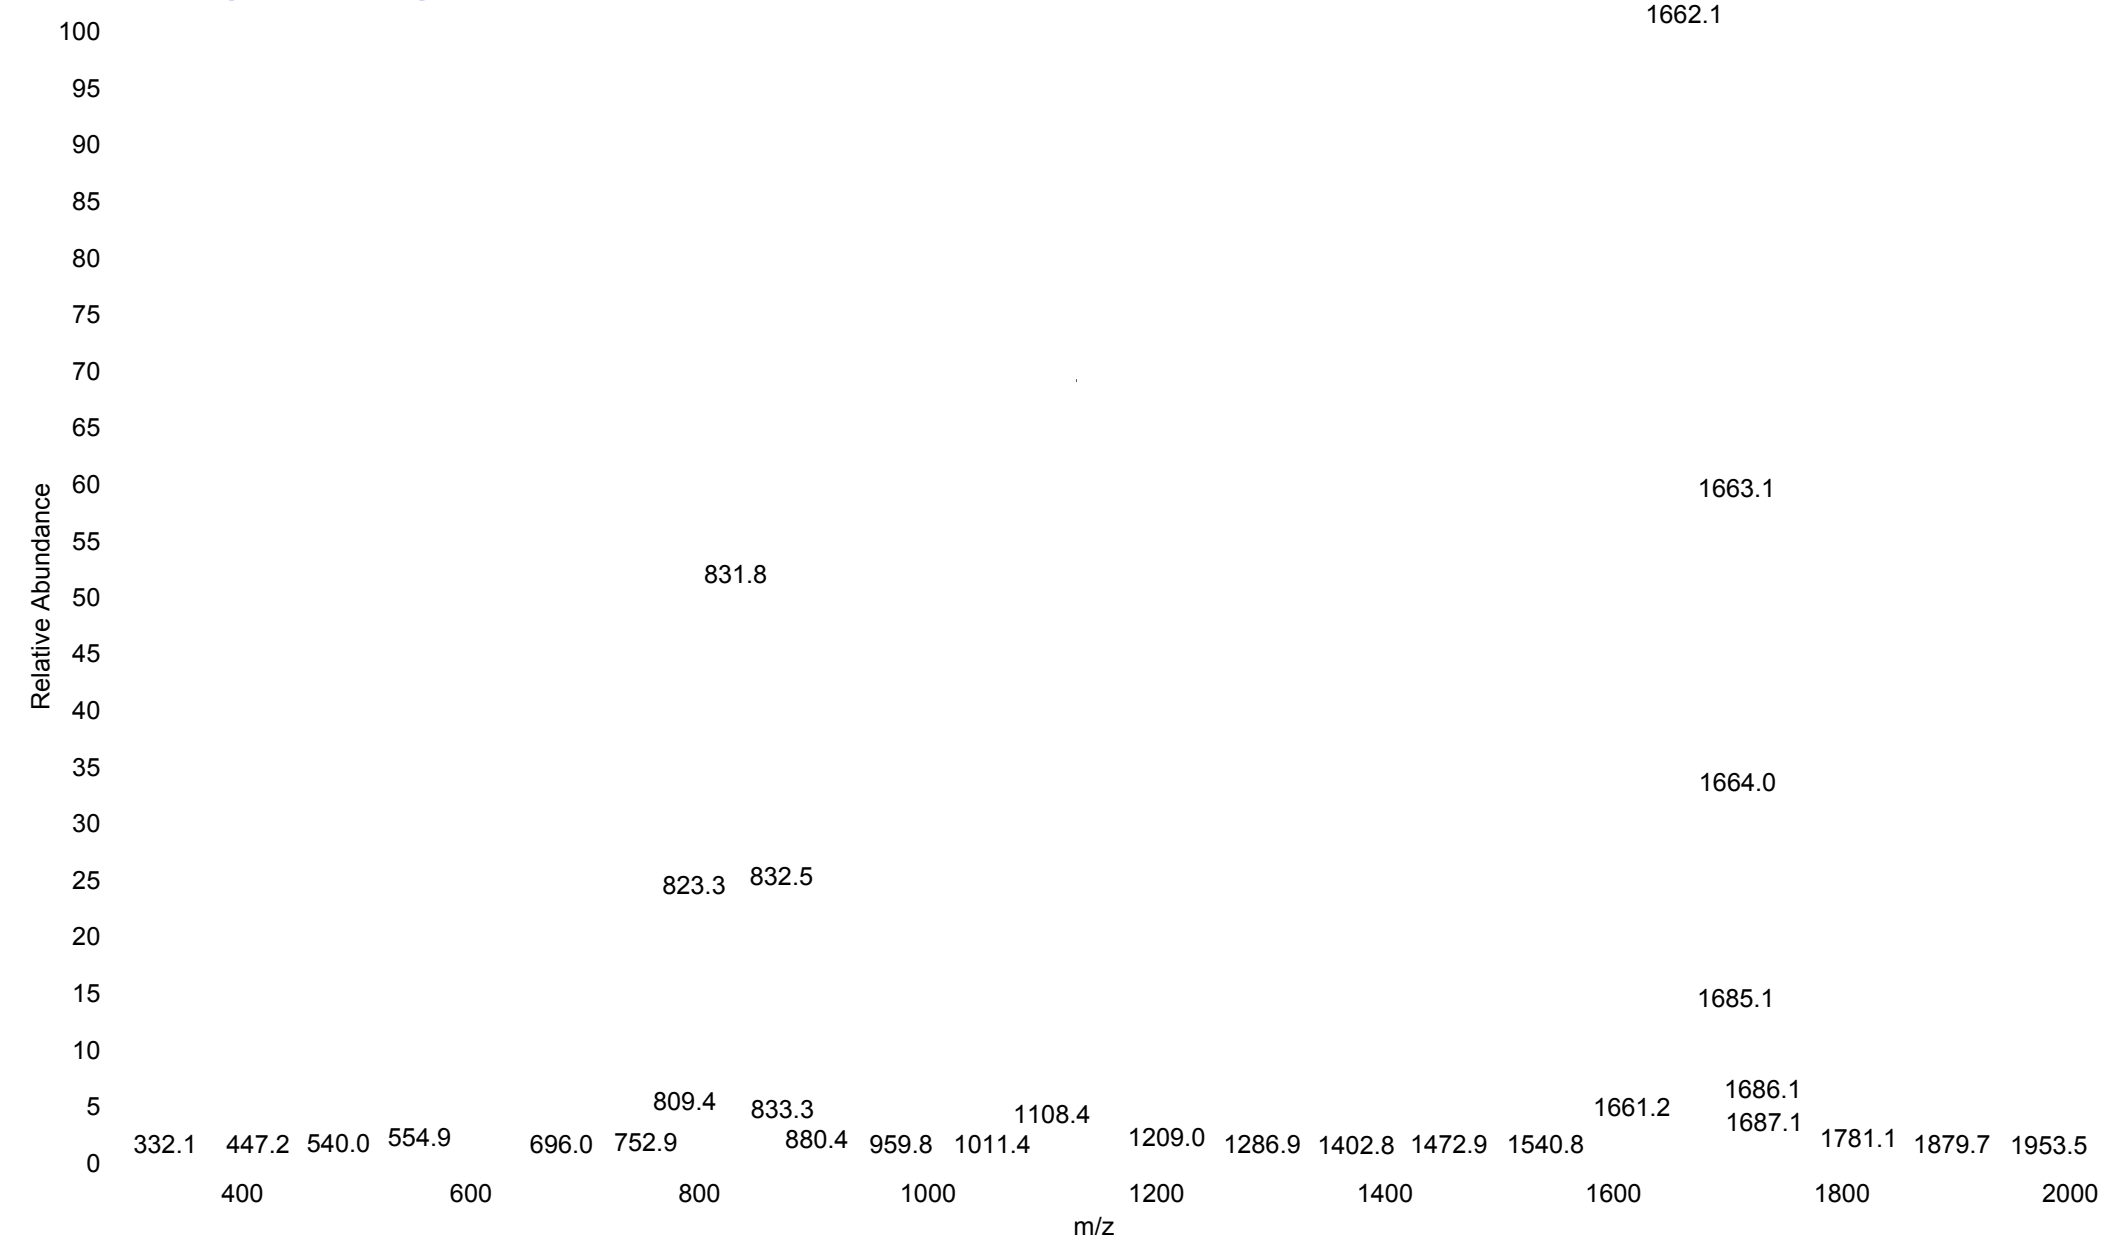



## Certificate of Analysis

**Product Name:** DMPI-delta (6 to 10 staple)    **Barcode#:** 0952506391  
0152555311

**Product #:** 973089    **Lot #:** CQ-03-02802

**Sequence:** H-DThr-DAla-DTrp(6-F)-DTyr-DAla-R5-DPhe(4-CF3)-DGlu  
-DLys-R5-DLeu-DArg-NH2 (olefin staple from R5 to R5)

**Molecular Weight:** 1619.8

**Mass Spectral Analysis:** Electrospray "Exhibits correct MW"  
(see attached MS spectrogram)

**HPLC Analysis:** Peptide purity: 94.6%  
(see attached RP-HPLC chromatogram)

**Solubility:** 1 mg/ml in DMSO

**Appearance:** White lyophilized powder

**Counter Ion:** Trifluoroacetate

**Cert. of Analysis Remarks:**

**Remarks:** Not for human use, research purpose only.

Quality Assurance By: Hawk Zhu    Date: 04/26/17  
Quality Control Department

### Chinese Peptide Company

No. 69,12 Street, Hangzhou Economic & Technological Development Zone, China 310018  
Tel: 86-571-86737011    86737118-8686  
Fax: 86-571-86737013  
Email: sales@chinesepeptide.com  
Website: www.chinesepeptide.com

```

=====
Injection Date : 4/25/2017                Location   :      Vial 5
Sample Name    : Final                    Inj. Vol.  :      10 µl
Acq Operator   : ZWJ
Acq. Method   : Final.M
Analysis Method : C:\HPCHEM\1\METHODS\FINAL.M
    
```

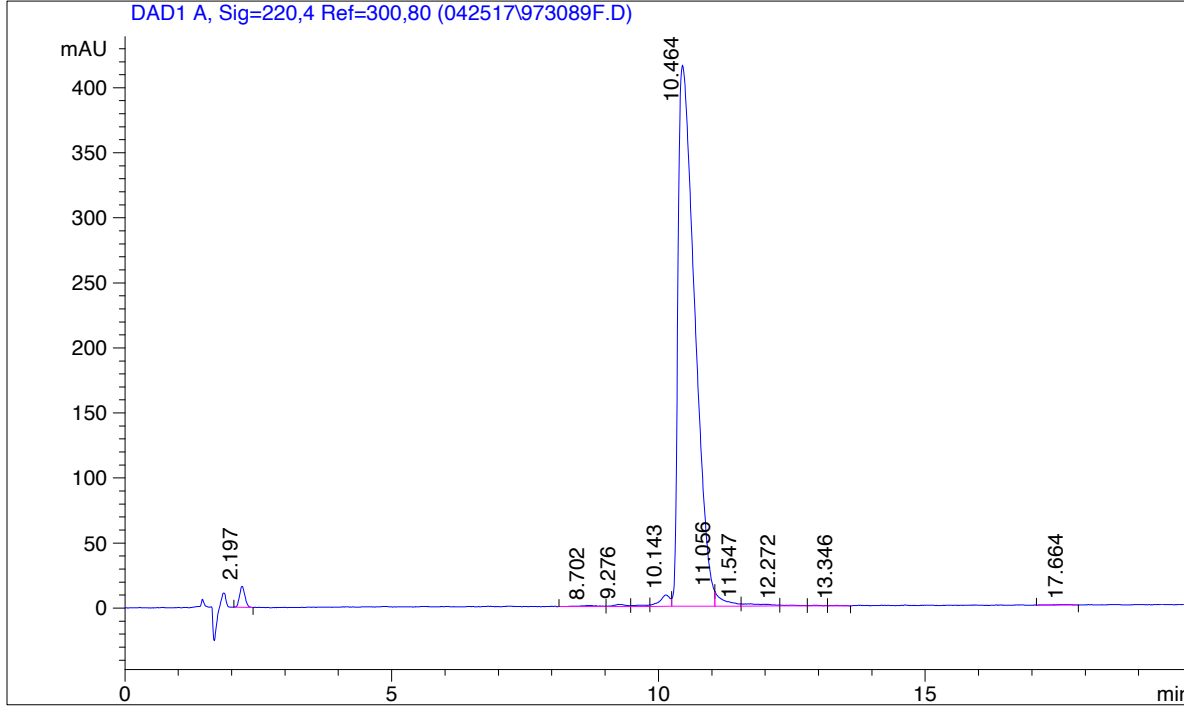

```

=====
Signal 1:DAD1 A, Sig=220,4 Ref=300,80
    
```

| Peak # | RT [min] | Type | Height  | Width [min] | Area     | Area % |
|--------|----------|------|---------|-------------|----------|--------|
| 1      | 2.197    | MM   | 16.381  | 0.115       | 112.946  | 1.188  |
| 2      | 8.702    | VV   | 0.846   | 0.354       | 22.440   | 0.236  |
| 3      | 9.276    | VV   | 1.525   | 0.243       | 24.168   | 0.254  |
| 4      | 9.696    | VV   | 0.900   | 0.274       | 18.190   | 0.191  |
| 5      | 10.143   | VV   | 8.686   | 0.194       | 115.938  | 1.219  |
| 6      | 10.464   | VF   | 415.540 | 0.336       | 8995.650 | 94.613 |
| 7      | 11.056   | VF   | 11.398  | 0.182       | 124.756  | 1.312  |
| 8      | 11.547   | VF   | 1.674   | 0.556       | 55.888   | 0.588  |
| 9      | 12.272   | VV   | 0.630   | 0.352       | 13.287   | 0.140  |
| 10     | 12.943   | VV   | 0.374   | 0.242       | 6.534    | 0.069  |
| 11     | 13.346   | VV   | 0.443   | 0.167       | 4.896    | 0.051  |
| 12     | 17.664   | MM   | 0.543   | 0.403       | 13.129   | 0.138  |

```

=====
    
```

\*\*\* End of Report \*\*\*

973089F

Type: Unknown ID: Unknown46 Row: 1

Sample Name:  
Sample Name: 973089  
Lot #: CQ-03-02802  
MW: 1619.8  
Sample Type: FINAL  
Operator: ZWJ  
Instrument Method: D:\data\Method\R&D\MS\MS-290.meth

973089F #9-20 RT: 0.21-0.45 AV: 12 NL: 2.34E8

T: + c ESI Full ms [ 290.00-2000.00]

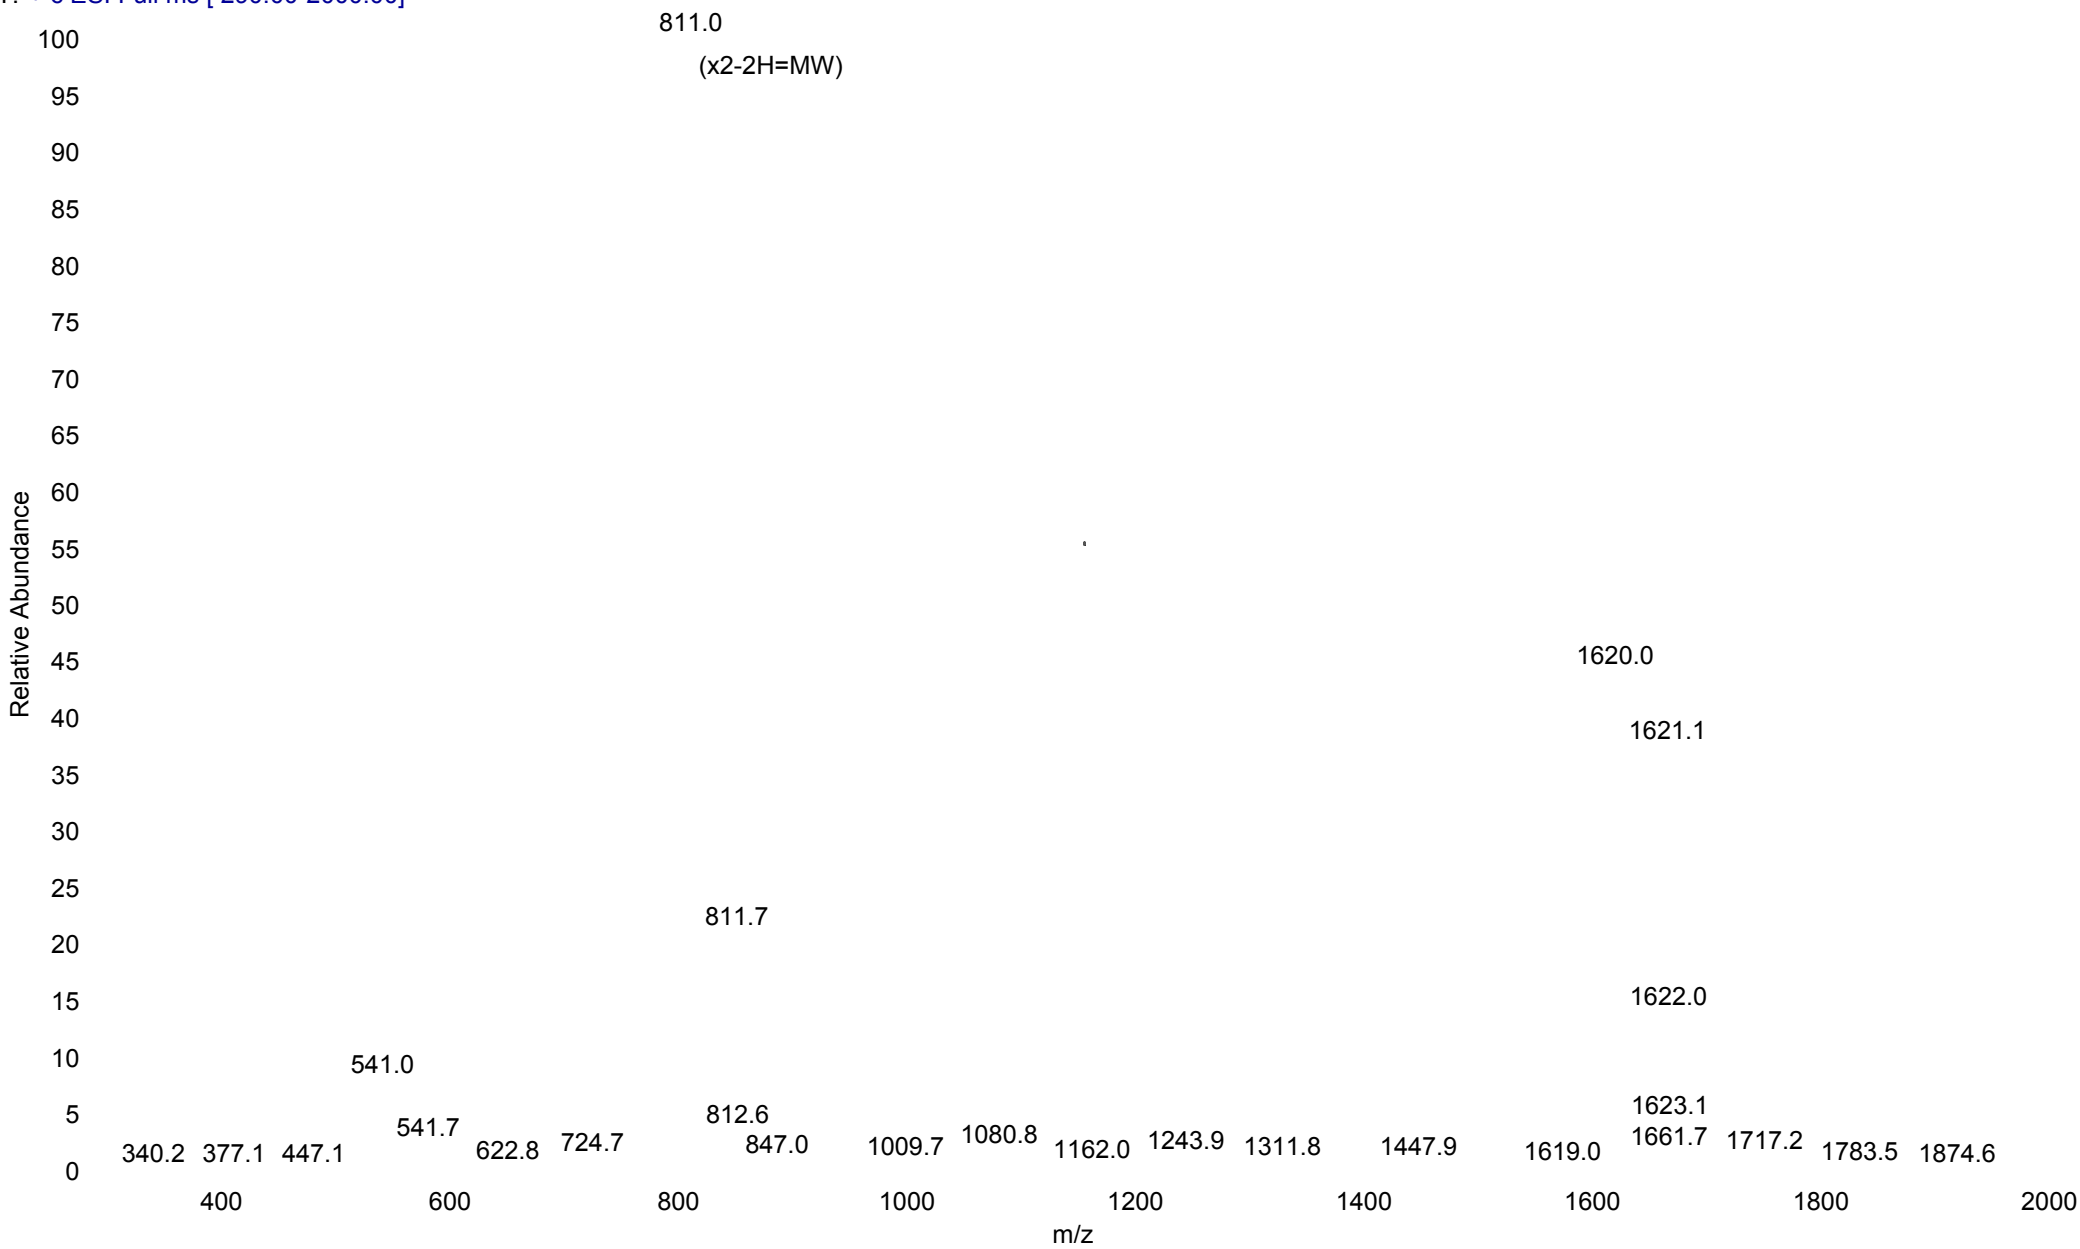



## Certificate of Analysis

**Product Name:** azide-ATSP-7041 (K1 to E5 lactam) **Barcode#:** 0952506728  
0152555083

**Product #:** 973072 **Lot #:** CQ-03-02785

**Sequence:** Ac-Lys(N3)-betaAla-(Lys-Thr-Phe-R8-Glu)-Tyr-Trp-Ala  
-Gln-Cba-S5-Ser-Ala-Ala-NH2 (olefin staple from R8 to  
S5, cycle from Glu to Lys)

**Molecular Weight:** 1967.3

**Mass Spectral Analysis:** Electrospray "Exhibits correct MW"  
(cis/trans isomers mixture see attached MS spectrogram)

**HPLC Analysis:** Peptide purity: 94.3%  
(see attached RP-HPLC chromatogram)

**Solubility:** 1 mg/ml in DMSO

**Appearance:** White lyophilized powder

**Counter Ion:** No Salt

**Cert. of Analysis Remarks:**

**Remarks:** Not for human use, research purpose only.

Quality Assurance By: Hawk Zhu Date: 04/20/17  
Quality Control Department

### Chinese Peptide Company

No. 69,12 Street, Hangzhou Economic & Technological Development Zone, China 310018  
Tel: 86-571-86737011 86737118-8686  
Fax: 86-571-86737013  
Email: sales@chinesepeptide.com  
Website: www.chinesepeptide.com

Sample ID:973072 Lot#:CQ-03-02785

Mobile Phase:A:0.1% TFA in H2O

B:0.09% TFA in (80%ACN+20%H2O)

Flow:1.0 mL/min 65.0%-75.0% B buffer in 20 min

Column:Phenomenex C18(2) 5u 100A 4.6\*150mm A832# Lot:D0100046

QC files for MP-002

```

=====
Injection Date : 4/18/2017          Location   :      Vial 4
Sample Name    : Final              Inj. Vol.  :      20 µl
Acq Operator   : ZWJ
Acq. Method    : Final.M
Analysis Method : C:\HPCHEM\1\METHODS\FINAL.M
  
```

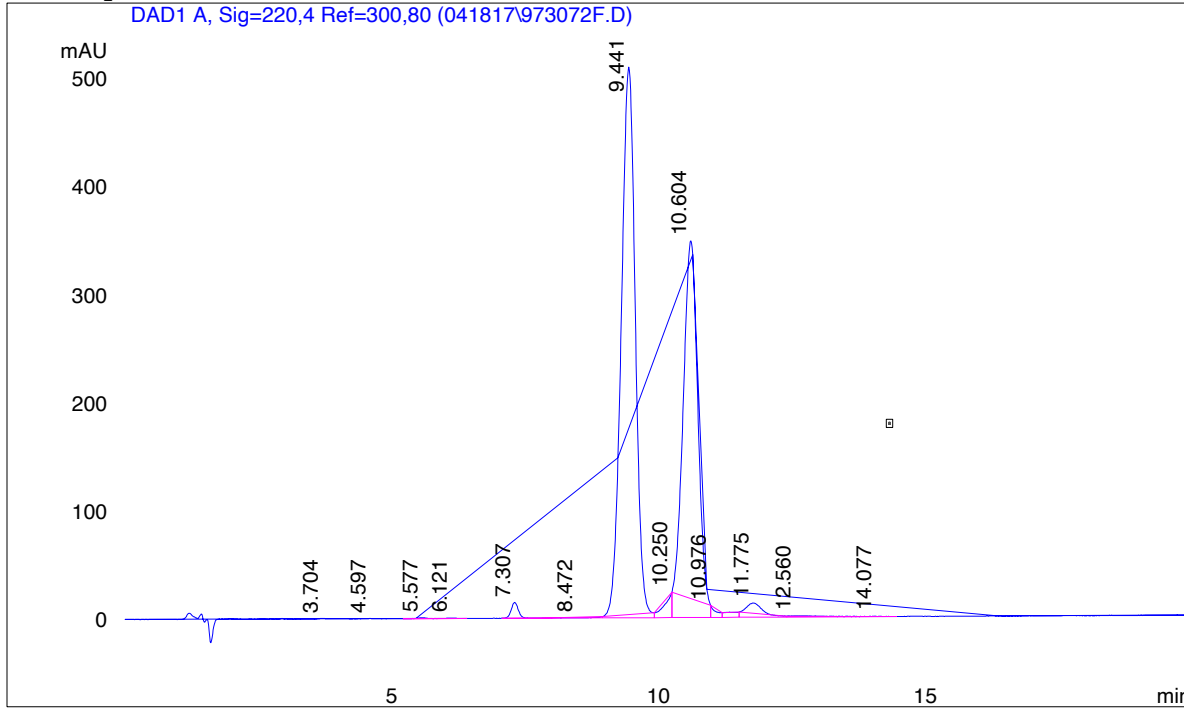

```

=====
Signal 1:DAD1 A, Sig=220,4 Ref=300,80
  
```

| Peak # | RT [min] | Type | Height  | Width [min] | Area     | Area % |
|--------|----------|------|---------|-------------|----------|--------|
| 1      | 3.704    | VV   | 0.736   | 0.239       | 12.668   | 0.074  |
| 2      | 4.597    | VV   | 0.425   | 0.231       | 6.772    | 0.040  |
| 3      | 5.577    | VV   | 0.786   | 0.243       | 12.956   | 0.076  |
| 4      | 6.121    | VP   | 0.508   | 0.281       | 9.155    | 0.053  |
| 5      | 7.307    | VV   | 14.752  | 0.156       | 140.296  | 0.820  |
| 6      | 8.472    | VV   | 0.312   | 0.756       | 19.530   | 0.114  |
| 7      | 9.441    | VV   | 508.317 | 0.284       | 9313.252 | 54.422 |
| 8      | 10.250   | VV   | 23.603  | 0.155       | 218.902  | 1.279  |
| 9      | 10.604   | VF   | 348.015 | 0.306       | 6838.379 | 39.960 |
| 10     | 10.976   | VV   | 11.205  | 0.117       | 78.457   | 0.458  |
| 11     | 11.363   | VV   | 4.667   | 0.259       | 85.679   | 0.501  |
| 12     | 11.775   | VV   | 13.046  | 0.359       | 315.516  | 1.844  |
| 13     | 12.560   | VV   | 1.049   | 0.547       | 46.845   | 0.274  |
| 14     | 14.077   | VV   | 0.373   | 0.482       | 14.595   | 0.085  |

```

=====
  
```

```

*** End of Report ***
  
```



973072F

Type: Unknown ID: Unknown Row: 1

Sample Name:  
Sample Name: 973072  
Lot #: CQ-03-02785  
MW: 1967.3  
Sample Type: Final  
Operator: JJK  
Instrument Method: D:\data\Method\R&D\MS\MS-290.meth

973072F #4-10 RT: 0.08-0.22 AV: 7 NL: 5.20E7

T: + c ESI Full ms [ 290.00-2000.00]

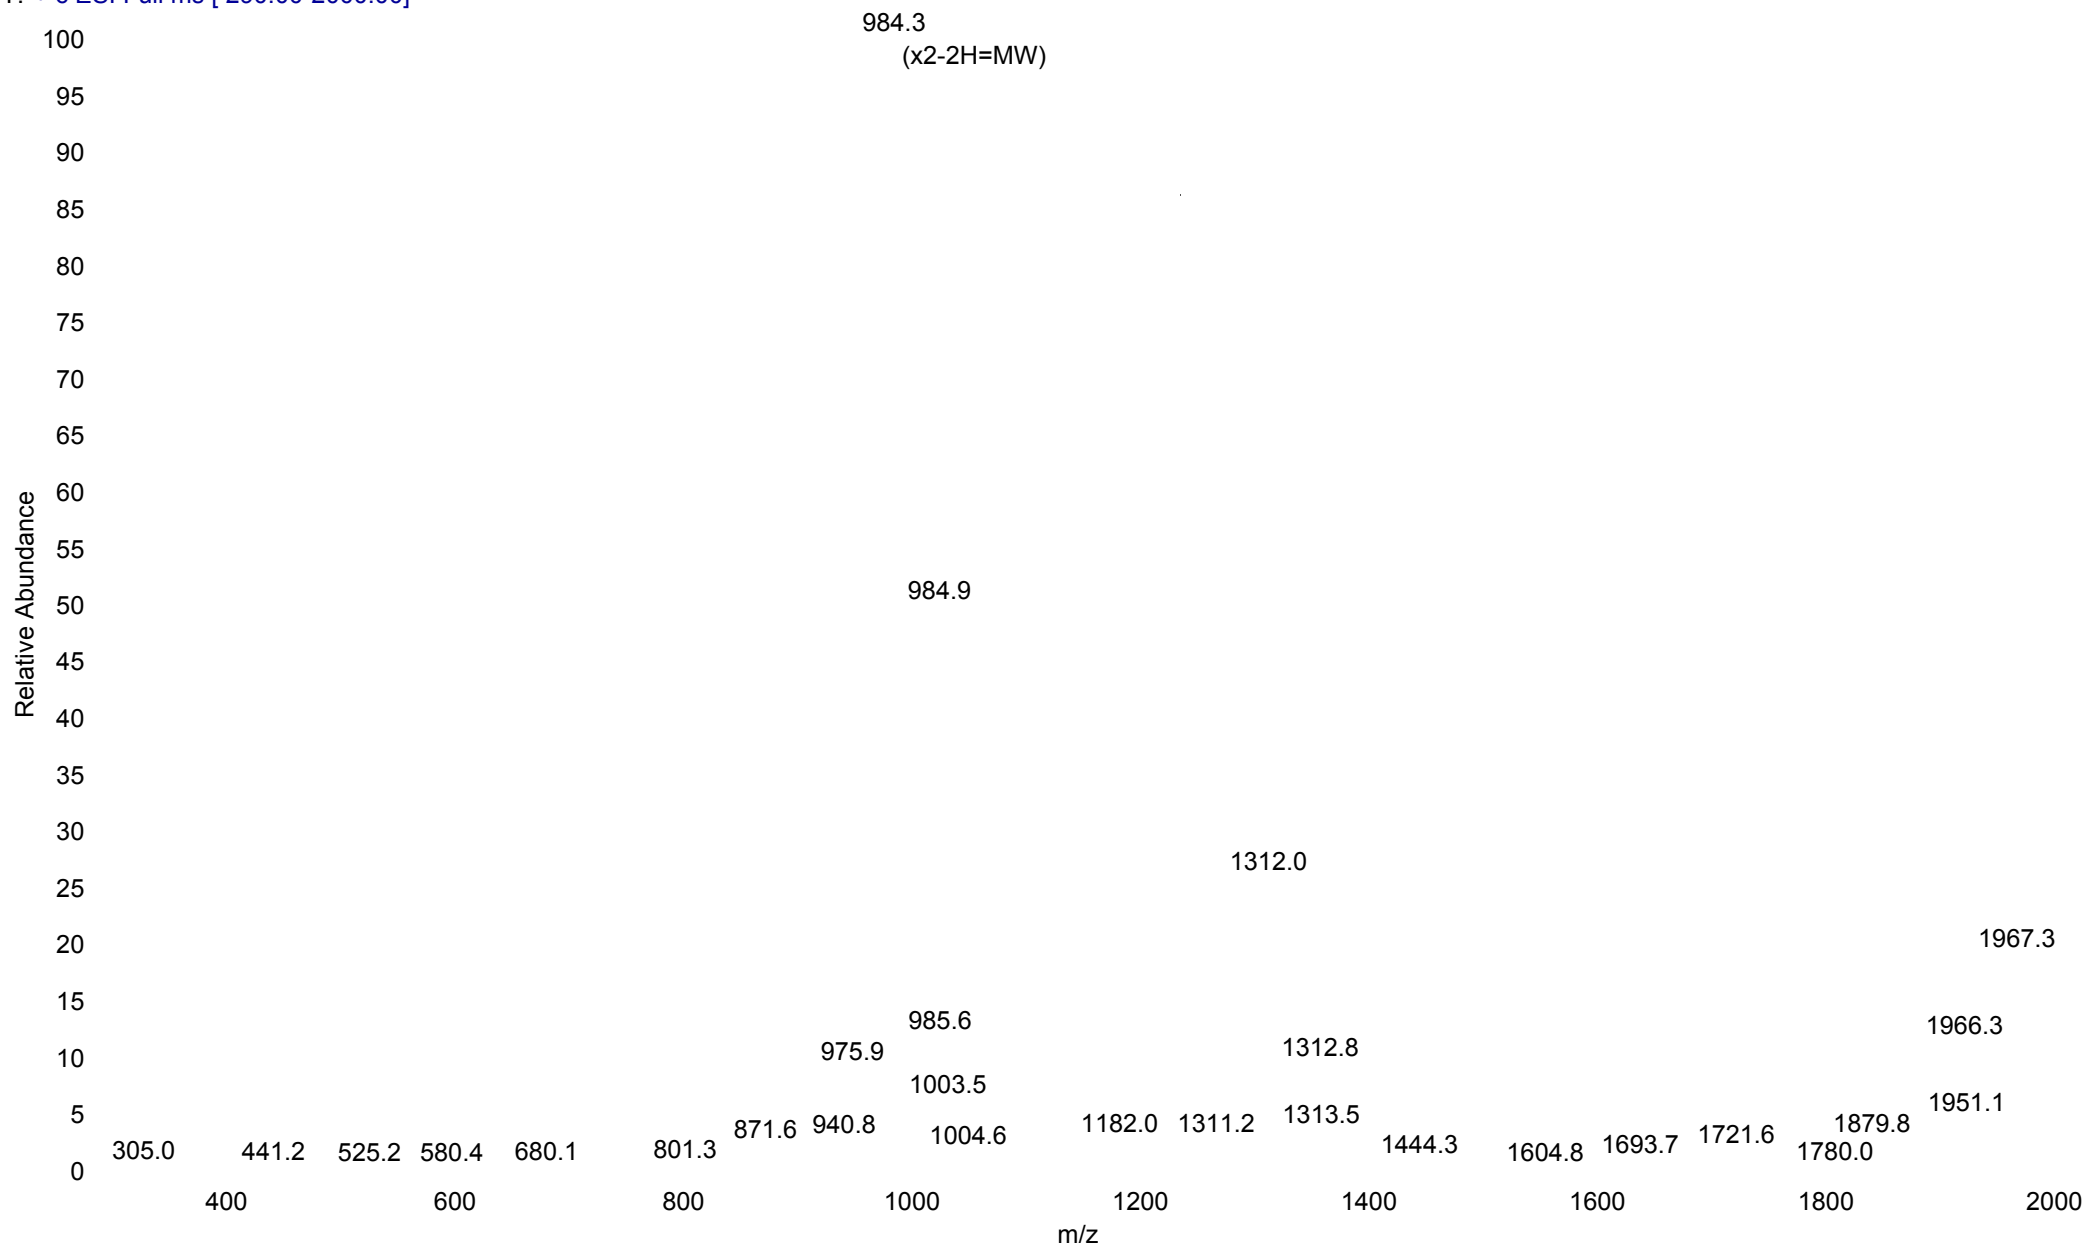



## Certificate of Analysis

**Product Name:** EEE-azide-SGS-PM2-EEE    **Barcode#:** 0955005020  
0154300353

**Product #:** 975714    **Lot #:** CT-04-00695

**Sequence:** Glu-Glu-Glu-Lys(N3)-Ser-Gly-Ser-Thr-Ser-Phe-R8-Glu-Tyr-Trp  
-Ala-Leu-Leu-S5-Glu-Glu-Glu-NH2 (olefin staple from R8 to S5)

**Molecular Weight:** 2580.8

**Mass Spectral Analysis:** Electrospray "Exhibits correct MW"  
(see attached MS spectrogram)

**HPLC Analysis:** Peptide purity: 93.4%  
(cis/trans isomers mixture see attached RP-HPLC chromatogram)

**Solubility:** 1 mg/ml in DMSO

**Appearance:** Off-white lyophilized powder

**Counter Ion:** Trifluoroacetate

**Cert. of Analysis Remarks:**

**Remarks:** Not for human use, research purpose only.

Quality Assurance By: Hawk Zhu    Date: 05/15/20  
Quality Control Department

### Chinese Peptide Company

No. 69,12 Street, Hangzhou Economic & Technological Development Zone, China 310018  
Tel: 86-571-86737011    86737118-8686  
Fax: 86-571-86737013  
Email: sales@chinesepeptide.com  
Website: www.chinesepeptide.com

Sample ID:975714 Lot:CT-04-00695

Mobile phase:A:0.1% TFA in H2O

B:0.09% TFA in (80%ACN+20%H2O)

Flow:1.0 ml/min 50.0%-60.0% B buffer in 20min

Column:Phenomenex C18(2) 5u 100A 4.6\*150mm A1112#

## QC files for MP-950

```

=====
Injection Date   : 5/14/2020                Location       : Vial 92
Sample Name     : Final                     Inj. Vol.     : 5 µl
Acq Operator    : ZWJ
Acq. Method     : Final.M
Analysis Method : C:\HPCHEM\1\METHODS\FINAL.M
  
```

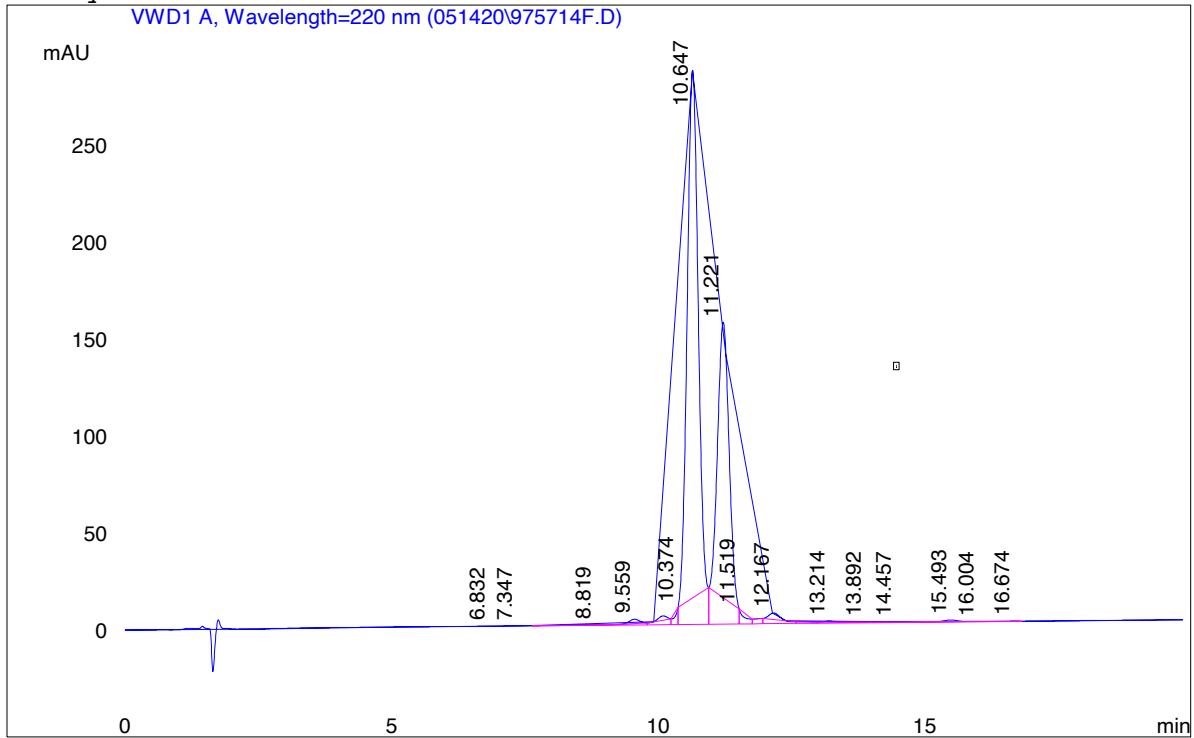

| Peak # | Signal RT [min] | Type | Width [min] | Height  | Area     | Area % |
|--------|-----------------|------|-------------|---------|----------|--------|
| 1      | 6.832           | VV   | 0.237       | 0.107   | 1.643    | 0.022  |
| 2      | 7.347           | VV   | 0.362       | 0.097   | 2.283    | 0.031  |
| 3      | 8.819           | VV   | 0.596       | 0.388   | 17.303   | 0.236  |
| 4      | 9.559           | VV   | 0.267       | 2.923   | 52.371   | 0.716  |
| 5      | 10.099          | VV   | 0.247       | 4.510   | 75.215   | 1.028  |
| 6      | 10.374          | VV   | 0.065       | 8.905   | 34.606   | 0.473  |
| 7      | 10.647          | VV   | 0.240       | 285.072 | 4300.078 | 58.767 |
| 8      | 11.221          | VF   | 0.255       | 155.240 | 2539.314 | 34.704 |
| 9      | 11.519          | VV   | 0.114       | 7.673   | 52.365   | 0.716  |
| 10     | 11.966          | VV   | 0.192       | 2.728   | 31.407   | 0.429  |
| 11     | 12.167          | VV   | 0.289       | 5.493   | 108.672  | 1.485  |
| 12     | 12.753          | VV   | 0.304       | 0.836   | 17.616   | 0.241  |
| 13     | 13.214          | VV   | 0.333       | 1.002   | 23.078   | 0.315  |
| 14     | 13.892          | VV   | 0.510       | 0.583   | 22.607   | 0.309  |
| 15     | 14.457          | VV   | 0.342       | 0.337   | 7.710    | 0.105  |
| 16     | 15.493          | VV   | 0.375       | 1.007   | 26.300   | 0.359  |
| 17     | 16.004          | VV   | 0.203       | 0.114   | 1.593    | 0.022  |
| 18     | 16.674          | VV   | 0.444       | 0.088   | 2.948    | 0.040  |

```

=====
*** End of Report ***
  
```

# QC files for MP-950

**Data file:** D:\DATE\200514\20200514-1 2020-05-14 11-30-26\975714.D  
**Sample name:** 975714  
**Description:** Lot#:CT-04-00695  
MW:2580.8  
Sample Type:Final  
**Acq. method:** 290-2000-Negative-Frag 130v.M

5/14/2020 12:44:17 PM

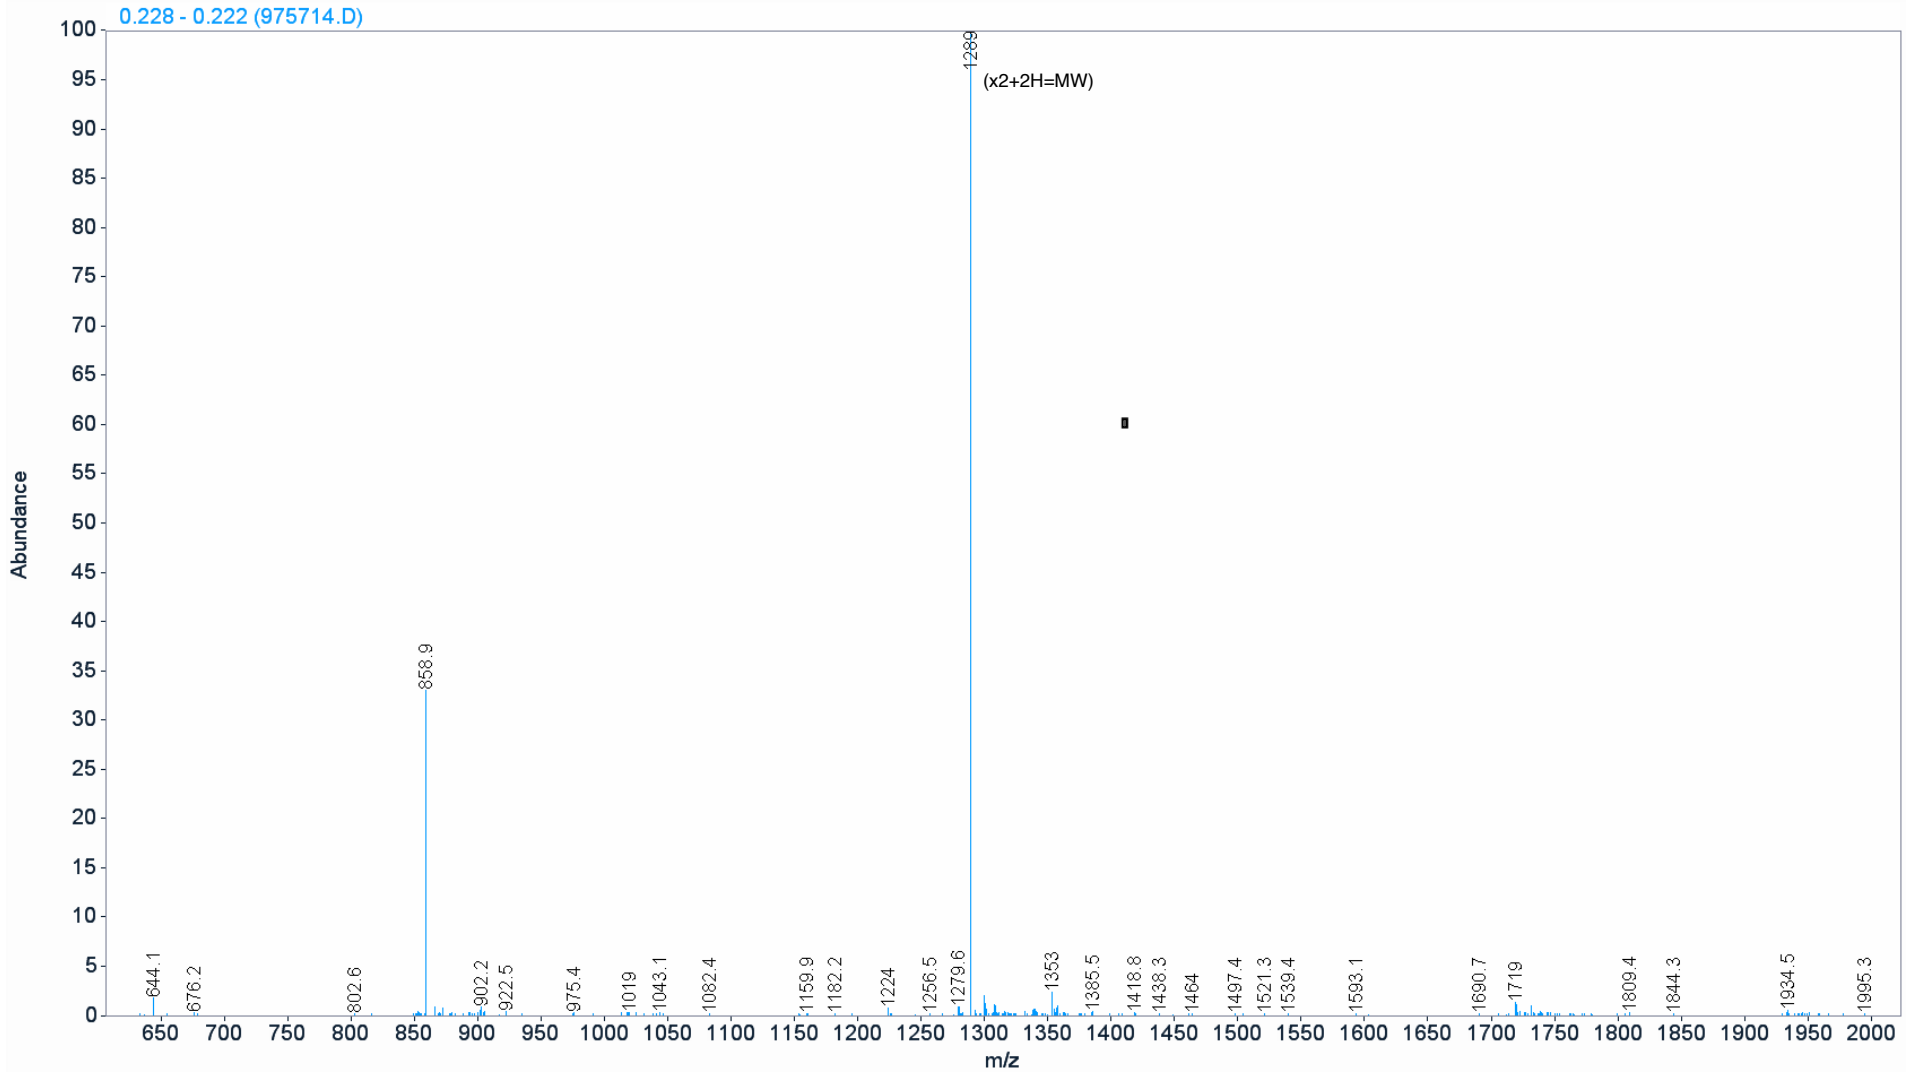

Sample ID:994408 Lot:CU-06-00367

Mobile phase:A:0.1% TFA in H2O

B:0.09% TFA in (80%ACN+20%H2O)

Flow:1.0 ml/min 58.0%-68.0% B buffer in 20 min

Column:Phenomenex C18(2) 5u 100A 4.6\*150mm A1184#

Equipment ID:2014070201 Computer ID:C6307082701

QC files for MP-950

```

=====
Injection Date   : 6/29/2021                Location    :      Vial 22
Sample Name     : Final                    Inj. Vol.  :      5 µl
Acq Operator    : ZWJ
Acq. Method     : Final.M
Analysis Method : C:\HPCHEM\1\METHODS\FINAL.M
=====

```

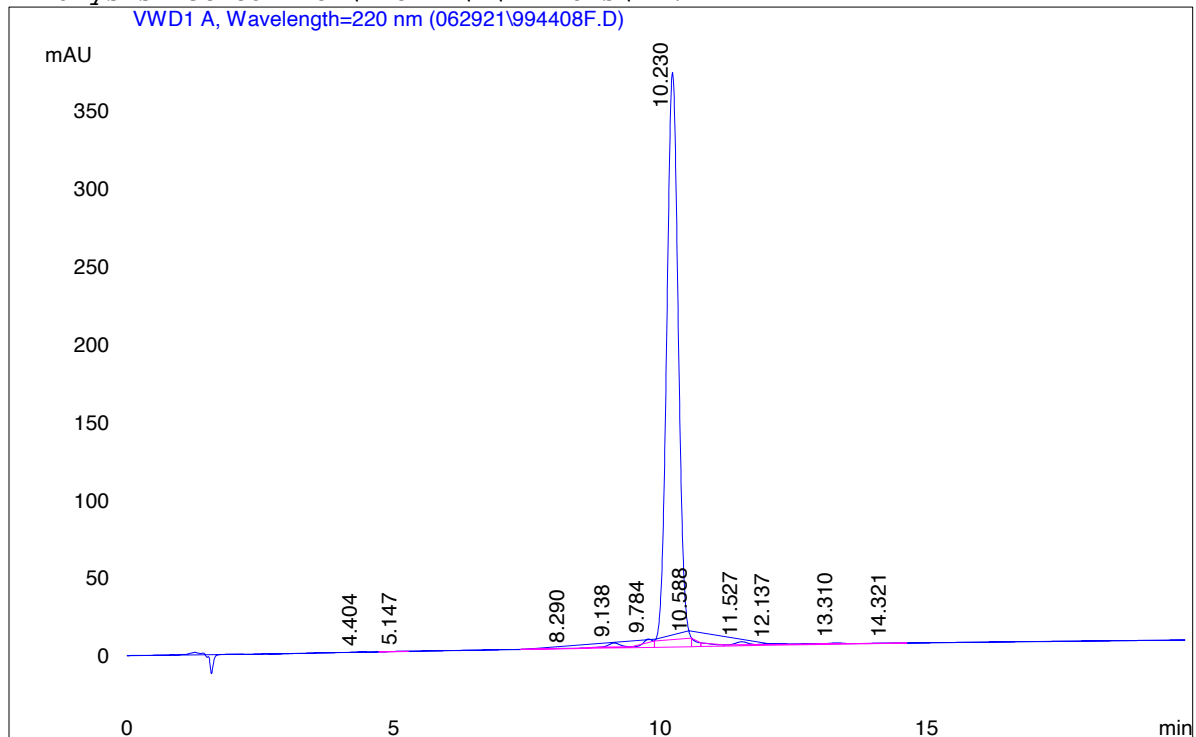

| Peak # | Signal RT [min] | 1:VWD1 A, Type | Width [min] | Height  | Area     | Area % |
|--------|-----------------|----------------|-------------|---------|----------|--------|
| 1      | 4.404           | BV             | 0.344       | 0.315   | 8.190    | 0.136  |
| 2      | 5.147           | VV             | 0.282       | 0.220   | 4.217    | 0.070  |
| 3      | 8.290           | VV             | 0.479       | 0.275   | 10.214   | 0.170  |
| 4      | 8.879           | VV             | 0.265       | 0.701   | 11.143   | 0.186  |
| 5      | 9.138           | VV             | 0.272       | 3.140   | 57.575   | 0.960  |
| 6      | 9.784           | VV             | 0.197       | 5.325   | 71.245   | 1.187  |
| 7      | 10.230          | VF             | 0.236       | 368.406 | 5622.391 | 93.705 |
| 8      | 10.588          | VF             | 0.105       | 5.563   | 35.171   | 0.586  |
| 9      | 10.762          | VV             | 0.262       | 2.356   | 37.096   | 0.618  |
| 10     | 11.527          | VV             | 0.306       | 2.610   | 54.162   | 0.903  |
| 11     | 12.137          | VV             | 0.490       | 1.166   | 39.122   | 0.652  |
| 12     | 13.014          | VV             | 0.502       | 0.558   | 16.793   | 0.280  |
| 13     | 13.310          | VV             | 0.361       | 0.916   | 22.837   | 0.381  |
| 14     | 14.321          | VV             | 0.812       | 0.159   | 9.931    | 0.166  |

```

=====
*** End of Report ***
=====

```
