# Supplementary material for: Design-rules for stapled peptides with in vivo activity and their application to Mdm2/X antagonists
Source: PubMed Central journal article supplement (PMC10786919; doi:10.1038/s41467-023-43346-4), 2024-01-12
Supplement: 41467_2023_43346_MOESM3_ESM.pdf [file 41467_2023_43346_MOESM3_ESM.pdf]

## **Description of Additional Supplementary Items**

**File name:** Supplementary Data 1

**Description:** Supplementary Table 1: Peptide unique identifiers (MP-IDs), sequences (chemical name), peptide names (trivial name), and processed data for all peptides synthesized in the current study.
